# Supplementary material for: Carriers of Heterozygous Loss-of-Function ACE Mutations Are at Risk for Alzheimer’s Disease
Source: MDPI journal article supplement (doi:10.3390/biomedicines12010162), 2024-01-12
Supplement: s1 [file s1]

## SUPPLEMENTARY MATERIALS

# Carriers of Heterozygous Loss-of-Function ACE Mutations Are at Risk for Alzheimer's Disease

Sergei M. Danilov <sup>1,\*</sup>, Ivan A. Adzhubei <sup>2</sup>, Alexander J. Kozuch <sup>1</sup>, Pavel A. Petukhov <sup>3</sup>, Isolda A. Popova <sup>4</sup>, Ananyo Choudhury <sup>5</sup>, Dhriti Sengupta <sup>5</sup> and Steven M. Dudek <sup>1</sup>

<sup>1</sup> Department of Medicine, Division of Pulmonary, Critical Care, Sleep and Allergy, University of Illinois Chicago, Chicago, IL 60612, USA; alexkozuch@gmail.com (A.J.K.); sdudek@uic.edu (S.M.D.)

<sup>2</sup> Department of Biomedical Informatics, Harvard Medical School, Boston, MA 02115, USA; iadzhubey@gmail.com

<sup>3</sup> Department of Pharmaceutical Sciences, College of Pharmacy, University of Illinois Chicago, Chicago, IL 60612, USA; pap4@uic.edu

<sup>4</sup> Toxicology Research Laboratory, University of Illinois Chicago, IL 60612, USA; ipopova3051@gmail.com

<sup>5</sup> Sydney Brenner Institute for Molecular Bioscience, University of the Witwatersrand, Johannesburg 2193, South Africa; ananyo.choudhury@wits.ac.za (A.C.); dhriti.sengupta@wits.ac.za (D.S.)

\* Correspondence: danilov@uic.edu; Tel.: +1-(708)-642-0635

Figures and Legends to Figures S1 to S3

Legends to Tables S1 to S4

and Tables S3 and S4 itself

Table S1 and Table S2 itself –

at the end of Supplementary Materials (due to big volume)

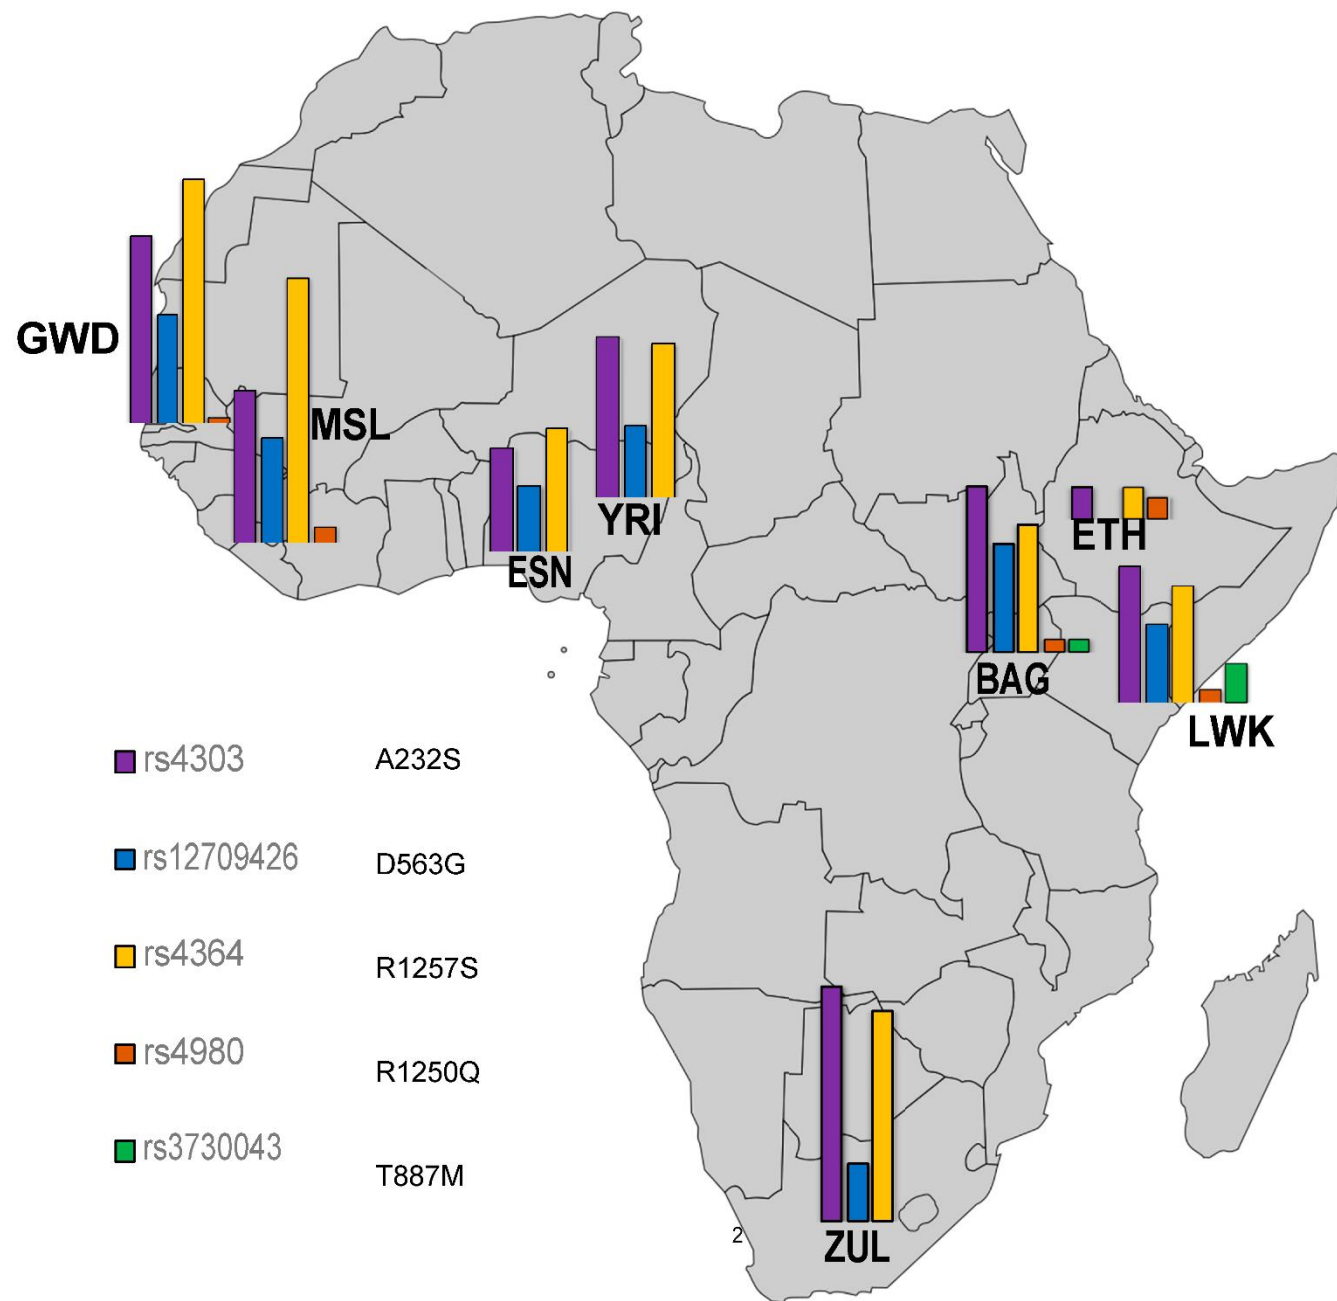

Figure S1

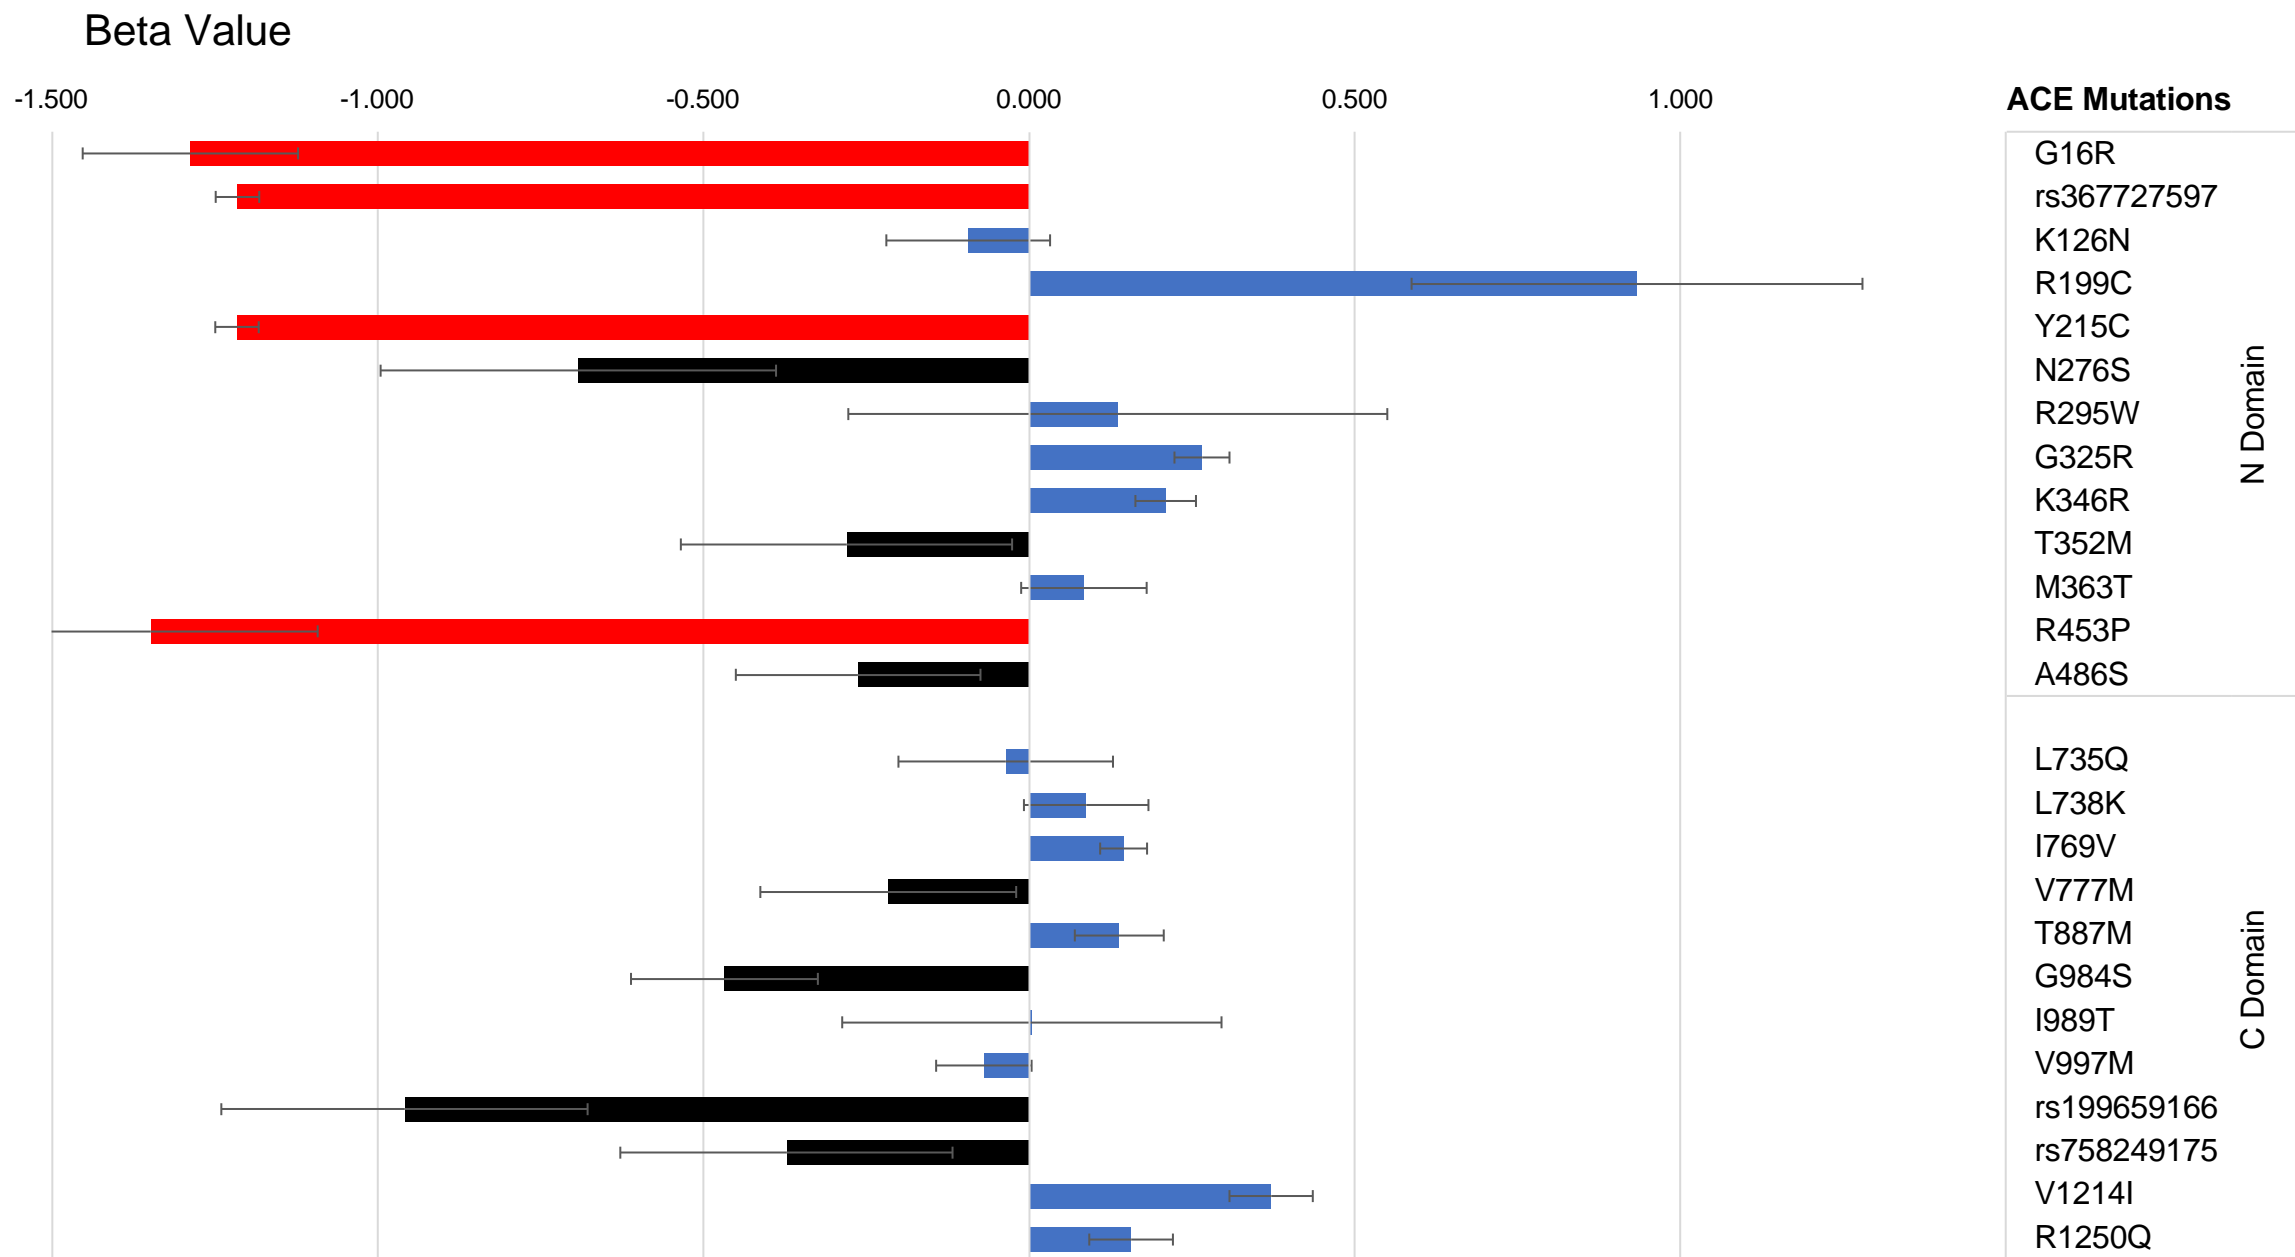

Figure S2

% of a particular distance occurs during the simulation

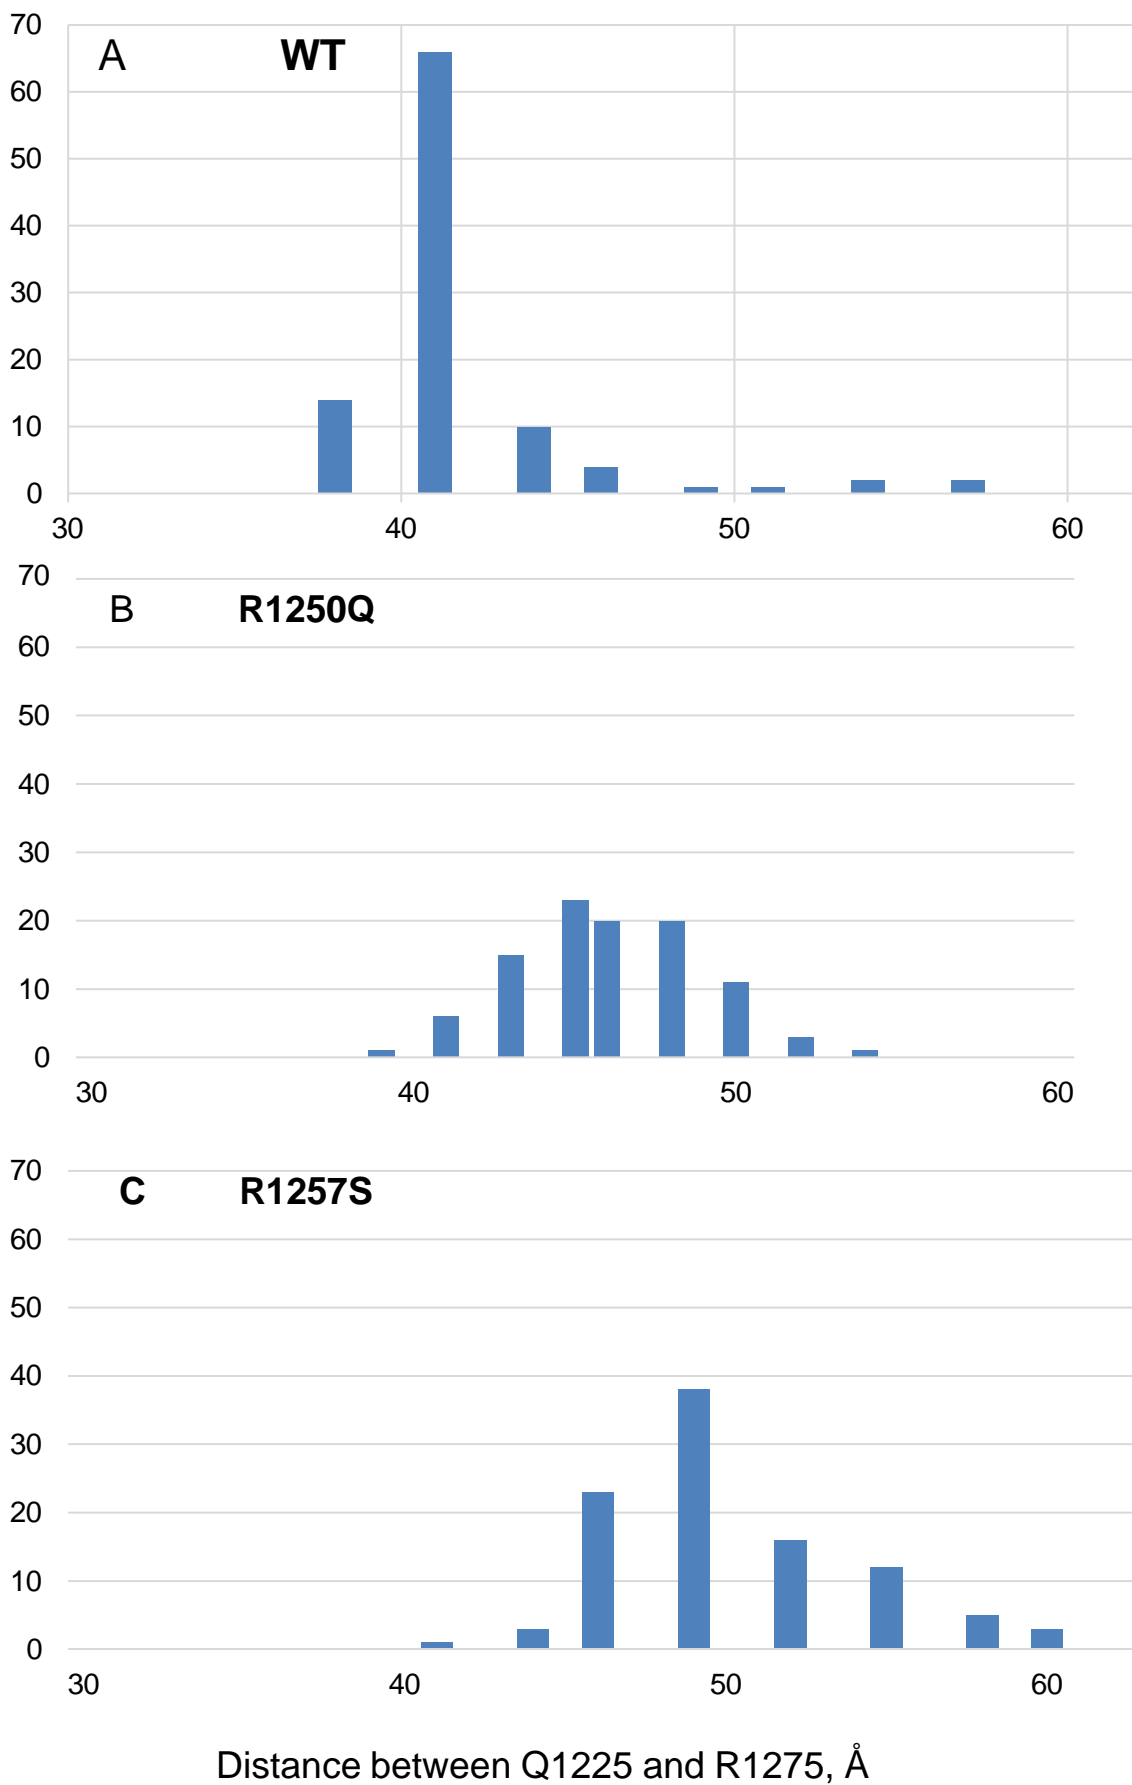

Figure S3

**Figure S1. Allele frequencies of select ACE variants within African populations.**

ESN: Esan in Nigeria; GWD: Gambian in Western Division, Mandinka; LWK: Luhya in Webuye, Kenya; MSL: Mende in Sierra Leone; YRI: Yoruba in Ibadan, Nigeria  
BAG: Baganda from Uganda; ETH: Amhara, Oromo, Somali and Gumuz from Ethiopia; ZUL: Zulu from South Africa

**Figure S2. Correlation of blood ACE levels with different ACE mutations found in Iceland.**

Correlations of blood ACE levels - from SomaScan assay [48], for each mostly missense ACE mutations found in this cohort of 35,559 Icelanders (from Table S4-GWAS summary statistics [48]) was presented as beta values (The beta of the variant/trait association) with their SE values.

At least carriers of three missense ACE mutations (G16R, Y215C and R453P) demonstrated dramatic drop in blood ACE levels (red bars) and another two ACE mutations (N276L and G984S)-demonstrated significant decrease in blood ACE levels (black bars).

**Figure S3. Distances between Q1225 and R1275 in WT ACE and both ACE mutants.**

A representative example of the analysis of the distances between Q1225 and R1275 in WT ACE and both ACE mutants (R1250Q and R1257S) during the simulation.

X axis -distances between residues Q1225 and R1275 during the simulation;

Y-axis- how much time (in %) a particular distance occurs during the simulation.

**Table S1. Analysis of missense ACE mutations in the available databases.**

List of 1,143 known coding non-synonymous single-nucleotide genetic variants (nsSNVs) in the ACE gene (ENST00000290866, GRCh38/hg38 genome assembly), for which minor allele frequencies (MAF) were determined from the population data: dbSNP MAF presented for each individual variant was the highest among 26 sequencing projects comprising missense variants in the ACE gene found in the dbSNP database [13] (<https://www.ncbi.nlm.nih.gov/projects/SNP/snp>) (build 155). For comparison, we also included minor allele frequencies obtained from the gnomAD v2.1.1 exome dataset, when present. Functional predictions and scores from four different *in silico* tools - PolyPhen-2 [15], SIFT4G [16], VEST4 [17] and REVEL [18] are included and majority vote predictions (Benign/Damaging) added for cases where more than two of the tools independently deliver the same prediction.

**Polyphen2:** PolyPhen-2 (dbNSFP version 3.3a) annotation based on HumanVar database. This annotation should be used when evaluating rare alleles at loci potentially involved in complex phenotypes, dense mapping of regions identified by genome-wide association studies, and analysis of natural selection from sequence data. The annotation consists of score and categorical prediction. There are three possible predictions: **D** (**Probably** damaging, score $\geq$ 0.909), **P** (**possibly** damaging, 0.446 $\leq$ score $\leq$ 0.908), B (benign, score $\leq$ 0.445).

**SIFT4G:** mutation considered damaging if score is less than 0.5.

**VEST4** and **REVEL:** mutation considered damaging if score is more than 0.5.

Majority of the missense variants in ACE gene lack any known disease association and a few variants found in the ClinVar [19] database (77 variants) are annotated either as Benign/Likely benign (23) or as variants of unknown significance (54).

**Table S2. All ACE mutations classified according to PolyPhen-2 scores.**

Name of the ACE mutations (column 3), that were already confirmed as LoF, were marked with red.

<sup>a</sup> Japanese; <sup>b</sup> Mutations, eliminating transmembrane anchor, i.e. increasing (>10-fold) blood ACE, and thus, decreasing tissue ACE; <sup>c</sup> mostly African; <sup>d</sup> frequent in Netherlands;

Frequency of mutations (MAF, column 6): >10-**bold**, >100-**red**, >1000-**bold red**.

Blood ACE levels (column 7) is expressed as % of mean in population.

**Polyphen2:** PolyPhen-2 (dbNSFP version 3.3a) annotation based on HumanVar database. This annotation should be used when evaluating rare alleles at loci potentially involved in complex phenotypes, dense mapping of regions identified by genome-wide association studies, and analysis of natural selection from sequence data. The annotation consists of score and categorical prediction. There are three possible predictions: **D** (**Probably** damaging, score $\geq$ 0.909), **P** (**possibly** damaging, 0.446 $\leq$ score $\leq$ 0.908), **B** (benign, score $\leq$ 0.445).

**References for Table S2 in Supplementary Materials.**

1. Gribouval, O. et al. Spectrum of mutations in the renin-angiotensin system genes in autosomal recessive renal tubular dysgenesis. *Hum. Mut.* **33**, 316–326 (2012).
2. Xie, X-Y. et al. Genetic profiles of familial late-onset Alzheimer’s disease in China: The Shanghai FLOAD Study. *Genes & Diseases* **9**, 1639–1649 (2022).
3. Kondoh, T. et al. Management of a preterm infant with renal tubular dysgenesis: A case report and review of the literature. *Tohoku J. Exp. Med.* **252**, 9–14 (2020)
4. Michaud, A. et al. Absence of cell surface expression of human ACE leads to perinatal death. *Hum. Mol. Genet.* **23**, 1479–1491 (2014).
5. Nesterovitch, A.B. et al. Angiotensin I-converting enzyme mutation (Trp1197Stop) causes a dramatic increase in blood ACE. *PLoS One* **4**, e8282 (2009).
6. Danilov, S.M. et al. Novel ACE mutations mimicking sarcoidosis by increasing blood ACE Levels. *Transl. Res.* **230**, 5–20 (2021).

7. Sassi, C. et al. Influence of coding variability in APP-A $\beta$  metabolism genes in sporadic Alzheimer's disease. *PLOS One* **11**, e0150079 (2016).
8. Lalli, M.A. et al. Exploratory data from complete genomes of familial Alzheimer's disease age-at-onset outliers. *Hum. Mutat.* **33**, 1630-1634 (2012).
9. Samokhodskaya, L.M. et al. Phenotyping angiotensin-converting enzyme in blood: A necessary approach for precision medicine. *J. Appl. Lab. Med.* **6**, 1179–1191 (2021).
10. Cuddy, L.K. et al. A $\beta$ -accelerated neurodegeneration caused by Alzheimer's-associated ace variant R1279Q is rescued by angiotensin system inhibition in mice. *Sci. Transl. Med.* **12**, eaaz2541 (2020).
11. Jacobson, P.A. et al. Genetic determinants of mycophenolate-related anemia and leukopenia after transplantation. *Transplantation* **91**, 309–316 (2011).
12. Danilov, S.M. et al. A novel angiotensin I-converting enzyme mutation (S333W) impairs N-domain enzymatic cleavage of the anti-fibrotic peptide, Ac-SDKP. *PLoS One* **9**: e88001 (2014).
13. Danilov, S.M. et al. An angiotensin I-converting enzyme mutation (Y465D) causes a dramatic increase in blood ACE via Accelerated ACE shedding *PLoS One* **6**, e25952 (2011).
14. Danilov, S.M. et al. Lysozyme and bilirubin bind to ACE and regulate its conformation and shedding. *Sci. Rep.* **6**, 34913 (2016).
15. Nicolaou, N. et al. Prioritization and burden analysis of rare variants in 208 candidate genes suggest they do not play a major role in CAKUT. *Kidney Int.* **89**, 476–486 (2016).
16. Ramoni, R.B., Himes, B.E., Sale, M.M., Furie, K.L. & Ramoni, M.F. Predictive genomics of cardioembolic stroke. *Stroke* **40**: (3 Suppl), S67-S70 (2009).
17. Danilov, S.M. et al. Angiotensin I-converting enzyme Gln1069Arg mutation impairs trafficking to the cell surface resulting in selective denaturation of the C-domain. *PLoS One*. **5**: e10438 (2010).



18. Kramers, C. et al. Point mutation in the stalk of angiotensin-converting enzyme causes a dramatic increase in serum angiotensin-converting enzyme but no cardiovascular disease. *Circulation* **104**, 1236–1240 (2001).
19. Richard S. et al. Standards and guidelines for the interpretation of sequence variants: A joint consensus recommendation of the American College of Medical Genetics and genomics and the Association for Molecular Pathology. *Genet Med.* **17**, 405–424 (2015).

Table S3. Allele frequency and age of the ACE variants associated with Alzheimer's disease.

| ID          | Position<br>(Chr. 17) | REF | ALT | Genetic<br>position | Amino acid<br>position | Thousand Genomes Project |       |       |       |       |       |       |       |       |       |       |       |       |       |       |       | Gnomad |       |        |        |        |           | AGVP   |        |        | Allele Age<br>(years) | Comment |               |                                                                                                                                                                                                                                                                                                                               |                                                                                                                                                                                  |       |               |                                                                                                                     |
|-------------|-----------------------|-----|-----|---------------------|------------------------|--------------------------|-------|-------|-------|-------|-------|-------|-------|-------|-------|-------|-------|-------|-------|-------|-------|--------|-------|--------|--------|--------|-----------|--------|--------|--------|-----------------------|---------|---------------|-------------------------------------------------------------------------------------------------------------------------------------------------------------------------------------------------------------------------------------------------------------------------------------------------------------------------------|----------------------------------------------------------------------------------------------------------------------------------------------------------------------------------|-------|---------------|---------------------------------------------------------------------------------------------------------------------|
|             |                       |     |     |                     |                        | ALL                      | AFR   | GWD   | MSL   | ESN   | YRI   | LWK   | ASW   | ACB   | EUR   | CEU   | IBS   | FIN   | TSI   | GBR   | EAS   | SAS    | AMR   | All    | AFR    | FIN    | Other_EUR | EAS    | AMR    | BAG    |                       |         | ETH           | ZUL                                                                                                                                                                                                                                                                                                                           |                                                                                                                                                                                  |       |               |                                                                                                                     |
| rs4303      | 61557823              | G   | T   | p.Ala261Ser         | A232S                  | 0.031                    | 0.112 | 0.146 | 0.118 | 0.081 | 0.125 | 0.106 | 0.131 | 0.078 | 0.003 | 0.000 | 0.009 | 0.000 | 0.005 | 0.000 | 0.000 | 0.000  | 0.000 | 0.000  | 0.000  | 0.000  | 0.001     | 0.0150 | 0.0520 | 0.0000 | 0.0003                | 0.0000  | 0.0040        | 0.085                                                                                                                                                                                                                                                                                                                         | 0.000                                                                                                                                                                            | 0.045 | 55,817        | African -specific variant. Large variations within each region.                                                     |
| rs12709426  | 61561756              | A   | G   | p.Asp592Gly         | D563G                  | 0.020                    | 0.072 | 0.084 | 0.082 | 0.051 | 0.056 | 0.061 | 0.107 | 0.062 | 0.002 | 0.000 | 0.005 | 0.000 | 0.005 | 0.000 | 0.000 | 0.000  | 0.000 | 0.000  | 0.000  | 0.000  | 0.001     | 0.0150 | 0.0520 | 0.0000 | 0.0003                | 0.0000  | 0.0040        | 0.085                                                                                                                                                                                                                                                                                                                         | 0.000                                                                                                                                                                            | 0.045 | 55,817        | African -specific variant. Higher allele frequencies in West compared to other regions                              |
| rs4364      | 61574662              | C   | A   | p.Arg1286Ser        | R1257S                 | 0.037                    | 0.129 | 0.190 | 0.206 | 0.096 | 0.120 | 0.091 | 0.090 | 0.109 | 0.000 | 0.000 | 0.000 | 0.000 | 0.000 | 0.000 | 0.000 | 0.000  | 0.000 | 0.000  | 0.000  | 0.000  | 0.017     | 0.0330 | 0.1170 | 0.0000 | 0.0003                | 0.0000  | 0.0140        | 0.100                                                                                                                                                                                                                                                                                                                         | 0.025                                                                                                                                                                            | 0.165 | 84,285        | African -specific variant. High allele frequency difference between West-African and other African NC speakers.     |
| rs148995315 | 61564428              | G   | A   | p.Glu767Lys         | E738K                  | -                        | -     | -     | -     | -     | -     | -     | -     | -     | -     | -     | -     | -     | -     | -     | -     | -      | -     | -      | -      | -      | -         | 0.0002 | 0.0000 | 0.0003 | 0.0003                | 0.0000  | 0.0000        | -                                                                                                                                                                                                                                                                                                                             | -                                                                                                                                                                                | -     | Not available | European only variant. Absent in other continental populations in the gnomAD and completely absent in 1KGP dataset. |
| rs3730043   | 61568577              | C   | T   | p.Thr916Met         | T887M                  | 0.003                    | 0.005 | 0.000 | 0.000 | 0.000 | 0.000 | 0.030 | 0.008 | 0.000 | 0.008 | 0.020 | 0.005 | 0.005 | 0.000 | 0.011 | 0.001 | 0.001  | 0.000 | 0.0040 | 0.0030 | 0.0030 | 0.0060    | 0.0000 | 0.0020 | 0.010  | 0.000                 | 0.000   | 0.000         | 13,280                                                                                                                                                                                                                                                                                                                        | Present in East Africa at highest frequency but absent in other continental African populations. Higher frequency in CEU and GBR among europeans. Also, present in South Asians. |       |               |                                                                                                                     |
| rs142947404 | 61570992              | C   | A   | p.Asn1036Lys        | N1007K                 | 0.000                    | 0.000 | 0.000 | 0.000 | 0.000 | 0.000 | 0.000 | 0.000 | 0.000 | 0.000 | 0.000 | 0.000 | 0.000 | 0.005 | 0.000 | 0.000 | 0.000  | 0.000 | 0.002  | 0.0003 | 0.0000 | 0.0000    | 0.0010 | 0.0000 | 0.0000 | -                     | -       | -             | 15,843                                                                                                                                                                                                                                                                                                                        | Only in TSI and PEL in KGP and only in line of the European groups in Gnomad.                                                                                                    |       |               |                                                                                                                     |
| rs4980      | 61574642              | G   | A   | p.Arg1279Gln        | R1250S                 | 0.004                    | 0.005 | 0.004 | 0.012 | 0.000 | 0.000 | 0.010 | 0.000 | 0.005 | 0.004 | 0.005 | 0.000 | 0.015 | 0.000 | 0.000 | 0.000 | 0.002  | 0.009 | 0.0060 | 0.0030 | 0.0090 | 0.0070    | 0.0000 | 0.0020 | 0.010  | 0.017                 | 0.000   | Not available | Global variant occurring at almost equal frequency in MSL and LWK but absent in other poplations from Africa. Among Europeans in occurs in FIN but absent in other four ppopulations in 1KGP. Mild presence in South Asia. The Gnomad dataset also shows a slightly higher frequency in FIN compared to other European groups |                                                                                                                                                                                  |       |               |                                                                                                                     |

**1000 Genome Population codes.** AFR: African ancestry; ESN: Esan in Nigeria; GWD: Gambian in Western Division, Mandinka; LWK: Luhya in Webuye, Kenya; MSL: Mende in Sierra Leone; YRI: Yoruba in Ibadan, Nigeria; ACB: African Caribbean in Barbados; ASW: People with African Ancestry in Southwest USA; EUR: European ancestry; CEU: Utah residents (CEPH) with Northern and Western European ancestry; GBR: British in England and Scotland; FIN: Finnish in Finland; IBS: Iberian Populations in Spain; TSI: Toscani in Italia; EAS: East Asian ancestry; SAS: South Asian ancestry; AMR: Americas;

**Gnomad Population codes.** AFR: Africans/African Americans; FIN: Finnish European; Other\_EUR: Non-Finnish European; EAS: East Asian; AMR: Latino/Admixed American

**AGVP Population codes.** BAG: Baganda from Uganda; ETH: Amhara, Oromo, Somali and Gumuz from Ethiopia; ZUL: Zulu from South Africa

**Table S3. Allele frequency and age of the ACE variants associated with Alzheimer's disease.**

**1000 Genome Population codes.** AFR: African ancestry; ESN: Esan in Nigeria; GWD:

Gambian in Western Division, Mandinka; LWK: Luhya in Webuye, Kenya;

MSL: Mende in Sierra Leone;

YRI: Yoruba in Ibadan, Nigeria; ACB: African Caribbean in Barbados;

ASW: People with African Ancestry in Southwest USA; EUR: European ancestry;

CEU: Utah residents (CEPH) with Northern and Western European ancestry;

GBR: British in England and Scotland; FIN: Finnish in Finland; IBS: Iberian Populations in Spain;

TSI: Toscani in Italia; EAS: East Asian ancestry; SAS: South Asian ancestry; AMR: Americas;

**Gnomad Population codes.** AFR: Africans/African Americans; FIN: Finnish

European; Other\_EUR: Non-Finnish European; EAS: East Asian; AMR:

Latino/Admixed American

**AGVP Population codes.** BAG: Baganda from Uganda; ETH:

Amhara, Oromo, Somali and Gumuz from Ethiopia; ZUL: Zulu

from South Africa

**Table S4. GWAS summary statistics for blood ACE levels with different ACE mutations.**

| ## | Chrom 17 | ACE mutations | Mutant | Ref.   |               |                  | minus      |       | MAF (per 100, 000) |           |                 |                  |
|----|----------|---------------|--------|--------|---------------|------------------|------------|-------|--------------------|-----------|-----------------|------------------|
|    | Position | rsids         | Allele | Allele | Beta          | Pval             | log10 pval | SE    | Iceland            | TOPMED    | ACE Mutation    | ## of Icelanders |
|    |          |               |        |        |               |                  |            |       | n=35,559           | n=264,690 | <b>N domain</b> |                  |
| 1  | 63477227 | rs750712925   | C      | G      | <b>-1.288</b> | <b>6.83E-15</b>  | 14.166     | 0.165 | <b>82</b>          | 2.9       | <b>G16R</b>     | 29               |
| 2  | 63478502 | rs367727597   | C      | CA     | <b>-1.216</b> | <b>1.06E-289</b> | 288.976    | 0.033 | 1537               | 801       | intron          | <b>543</b>       |
| 3  | 63479054 | rs143320537   | C      | G      | -0.094        | 0.454736         | 0.342      | 0.126 | <b>97</b>          | 31        | <b>K126N</b>    | 34               |
| 4  | 63480363 | rs141543325   | T      | C      | 0.933         | 0.007057         | 2.151      | 0.346 | 17                 | 30        | <b>R199C</b>    | 6                |
| 5  | 63480412 | rs3730025     | G      | A      | <b>-1.217</b> | <b>3.31E-291</b> | 290.481    | 0.033 | 1534               | 924       | <b>Y215C</b>    | <b>542</b>       |
| 6  | 63481157 | rs141186617   | T      | A      | <b>-0.692</b> | 0.022607         | 1.646      | 0.304 | 18                 | 11        | <b>N276S</b>    | 6                |
| 7  | 63481590 | rs35141294    | T      | C      | 0.136         | 0.742838         | 0.129      | 0.414 | <b>11</b>          | 851       | <b>R295W</b>    | 4                |
| 8  | 63481680 | rs56394458    | A      | G      | 0.265         | <b>3.68E-10</b>  | 9.434      | 0.042 | 1022               | 539       | <b>G325R</b>    | <b>361</b>       |
| 9  | 63482471 | rs778168348   | G      | A      | 0.209         | 6.91E-06         | 5.160      | 0.047 | <b>759</b>         | 0.4       | <b>K346R</b>    | <b>268</b>       |
| 10 | 63482489 | rs150466411   | T      | C      | -0.281        | 0.269633         | 0.569      | 0.254 | 35                 | 67        | <b>T352M</b>    | 12               |
| 11 | 63482522 | rs138418851   | C      | T      | 0.084         | 0.385686         | 0.414      | 0.096 | <b>187</b>         | 5         | <b>M363T</b>    | <b>66</b>        |
| 12 | 63483131 | rs757694144   | C      | G      | <b>-1.349</b> | 1.50E-07         | 6.824      | 0.257 | <b>34</b>          | 4         | <b>R453P</b>    | 12               |
| 13 | 63483515 | rs144294634   | T      | G      | -0.263        | 0.161681         | 0.791      | 0.188 | <b>58</b>          | 7         | <b>A486S</b>    | 21               |
|    |          |               |        |        |               |                  |            |       |                    |           | <b>C domain</b> |                  |
| 14 | 63487059 | rs145819052   | A      | T      | -0.036        | 0.825124         | 0.083      | 0.165 | <b>54</b>          | 10        | <b>L735Q</b>    | 19               |
| 15 | 63487067 | rs148995315   | A      | G      | 0.087         | 0.362323         | 0.441      | 0.096 | <b>201</b>         | 19        | <b>L738K</b>    | 71               |
| 16 | 63488734 | rs117647476   | G      | A      | 0.145         | 6.08E-05         | 4.216      | 0.036 | <b>1462</b>        | 192       | <b>I769V</b>    | <b>517</b>       |
| 17 | 63488758 | rs769397961   | A      | G      | -0.217        | 0.270028         | 0.569      | 0.196 | <b>32</b>          | 4         | <b>V777M</b>    | 11               |
| 18 | 63491216 | rs3730043     | T      | C      | 0.138         | 0.043456         | 1.362      | 0.068 | 358                | 419       | <b>T887M</b>    | <b>127</b>       |
| 19 | 63493560 | rs571848794   | A      | G      | -0.468        | 0.001102         | 2.958      | 0.143 | <b>93</b>          | 7         | <b>G984S</b>    | 33               |
| 20 | 63493576 | rs4976        | C      | T      | 0.004         | 0.989591         | 0.005      | 0.291 | <b>16</b>          | 142       | <b>I989T</b>    | 6                |
| 21 | 63493599 | rs377550847   | T      | G      | -0.070        | 0.033705         | 0.472      | 0.073 | <b>274</b>         | 2         | <b>V997M</b>    | 97               |
| 22 | 63496377 | rs199659166   | T      | G      | <b>-0.959</b> | 6.48E-04         | 3.188      | 0.281 | <b>27</b>          | 116       | splicing        | 10               |
| 23 | 63496381 | rs758249175   | T      | C      | -0.373        | 0.143715         | 0.8425     | 0.255 | <b>32</b>          | 1         | splicing        | 11               |
| 24 | 63497172 | rs372416620   | A      | G      | 0.371         | 6.66E-09         | 8.176      | 0.064 | <b>469</b>         | 6         | <b>V1214I</b>   | <b>166</b>       |
| 25 | 63497281 | rs4980        | A      | G      | 0.156         | 0.015164         | 1.819      | 0.064 | 477                | 493       | <b>R1250Q</b>   | <b>169</b>       |

**Table S4. GWAS summary statistics for blood ACE levels with different ACE mutations.**

Plasma protein levels with SomaScan multiplex aptamer assay was measured for 4,719 proteins, including ACE, in 35,559 Icelanders with genotype and phenotype information [48]. Authors (and deCODE Genetics) made available the full GWAS summary statistics for each protein from this study including ACE (<https://download.decode.is/form/folder/proteomics>)

We excerpted these GWAS statistics for ACE (correlation of blood ACE levels with some ACE mutations-beta value) and added Mean Allele Frequency for each mostly missense ACE mutations found in Iceland cohort and Mean Allele Frequency in general population (TOPMED with 264,690 participants)- in order to compare with frequency distribution of a given ACE mutation in Iceland. Those ACE mutations, which frequency in Iceland was more than 10-fold higher than in TOPMED cohort, were highlighted with green and their frequencies were highlighted with red. Those mutations which frequencies were several folds lower in Iceland were highlighted with yellow. Note ACE mutation K346R (rs778168348) highlighted with magenta, which is pretty endemic for Iceland, because MAF for this mutation in Iceland was more than 1000-fold higher than for general population -TOPMED cohort. We also added the correct name of each mutation using mature ACE numbering and ACE domain localization (N or C) and calculated amounts of subject with these ACE mutations in this cohort of 35, 559 Icelanders.

Table S1

Table S1 Analysis of ACE mutations

| Chr17    |         | Amino Acid   |         | Polyphen2 |              | HVAR |              | SIFT4G |              | VEST4 REVEL |                 | Majority      |               | Minor Allele Frequency |           | dbSNP Project | ClinVar significance   |
|----------|---------|--------------|---------|-----------|--------------|------|--------------|--------|--------------|-------------|-----------------|---------------|---------------|------------------------|-----------|---------------|------------------------|
| pos      | ref alt | rs_dbSNP     | Ref Alt | Pos       | Score        | Pred | Score        | Pred   | Score        | Score       | vote            | MAF / 100,000 | MAF / 100,000 | gnomAD Exomes          | All dbSNP |               |                        |
| 63477095 | A C     | rs1262893315 | M L     | 1         | 0.000        | B    | 0.239        | T      | <b>0.807</b> | 0.239       | Benign          | n/a           | 0.4           |                        |           | TOPMED        |                        |
| 63477096 | T A     | rs1005792910 | M K     | 1         | 0.016        | B    | <b>0.034</b> | D      | <b>0.836</b> | 0.249       |                 | n/a           | 6.0           |                        |           | TOMMO         |                        |
| 63477098 | G C     | rs2049627089 | G R     | 2         | <b>0.546</b> | P    | <b>0.000</b> | D      | 0.484        | 0.089       | Benign          | n/a           | 6.0           |                        |           | TOMMO         |                        |
| 63477099 | G T     | rs558593002  | G V     | 2         | 0.055        | B    | <b>0.000</b> | D      | 0.454        | 0.045       | Benign          | 53.0          | <b>579.0</b>  |                        |           | 1000Genomes   | Benign                 |
| 63477108 | C G     | rs1296229818 | S W     | 5         | 0.263        | B    | <b>0.023</b> | D      | 0.305        | 0.067       | Benign          | n/a           | 0.8           |                        |           | TOPMED        |                        |
| 63477110 | G C     | rs2049627437 | G R     | 6         | 0.027        | B    | <b>0.000</b> | D      | 0.297        | 0.093       | Benign          | n/a           | 0.7           |                        |           | GnomAD        |                        |
| 63477111 | G C     | rs1267076673 | G A     | 6         | 0.079        | B    | <b>0.000</b> | D      | 0.126        | 0.044       | Benign          | n/a           | 0.8           |                        |           | TOPMED        |                        |
| 63477113 | C G     | rs1285068027 | R G     | 7         | 0.001        | B    | 0.096        | T      | 0.163        | 0.054       | Benign          | n/a           | 0.7           |                        |           | GnomAD        |                        |
| 63477114 | G T     | rs1451926480 | R L     | 7         | 0.001        | B    | 0.124        | T      | 0.092        | 0.054       | Benign          | n/a           | 2.2           |                        |           | GnomAD        |                        |
| 63477116 | C T     | rs1333116255 | R W     | 8         | 0.001        | B    | <b>0.008</b> | D      | 0.131        | 0.103       | Benign          | 7.8           | 7.8           |                        |           | GnomAD_exomes | Uncertain_significance |
| 63477117 | G T     | rs2049627704 | R L     | 8         | 0.001        | B    | <b>0.038</b> | D      | 0.144        | 0.033       | Benign          | n/a           | 1.5           |                        |           | TOPMED        |                        |
| 63477119 | G T     | rs1320210312 | G W     | 9         | 0.008        | B    | 0.088        | T      | 0.283        | 0.044       | Benign          | n/a           | 0.8           |                        |           | TOPMED        |                        |
| 63477120 | G A     | rs1223694748 | G E     | 9         | 0.010        | B    | 0.072        | T      | 0.292        | 0.024       | Benign          | 3.0           | 3.0           |                        |           | GnomAD_exomes |                        |
| 63477126 | G T     | rs2049627977 | G V     | 11        | 0.007        | B    | 0.560        | T      | 0.221        | 0.027       | Benign          | n/a           | 0.7           |                        |           | GnomAD        |                        |
| 63477132 | T C     | rs1187548350 | L P     | 13        | 0.002        | B    | 0.146        | T      | 0.226        | 0.027       | Benign          | n/a           | <b>182.0</b>  |                        |           | KOREAN        |                        |
| 63477135 | T C     | rs1207951348 | L P     | 14        | 0.000        | B    | 0.084        | T      | 0.326        | 0.050       | Benign          | n/a           | 0.4           |                        |           | TOPMED        |                        |
| 63477137 | C T     | rs1193133040 | P S     | 15        | 0.001        | B    | 0.407        | T      | 0.163        | 0.019       | Benign          | 1.4           | <b>36.4</b>   |                        |           | KOREAN        |                        |
| 63477138 | C T     | rs1355518990 | P L     | 15        | 0.000        | B    | 0.804        | T      | 0.163        | 0.012       | Benign          | 1.4           | <b>109.0</b>  |                        |           | KOREAN        |                        |
| 63477140 | C A     | rs2049628775 | L M     | 16        | 0.004        | B    | 0.153        | T      | 0.250        | 0.046       | Benign          | n/a           | 6.0           |                        |           | TOMMO         |                        |
| 63477141 | T C     | rs1352305726 | L P     | 16        | 0.000        | B    | 0.203        | T      | 0.222        | 0.080       | Benign          | n/a           | 0.8           |                        |           | TOPMED        |                        |
| 63477143 | C T     | rs1599136248 | P S     | 17        | 0.001        | B    | 0.701        | T      | 0.149        | 0.054       | Benign          | n/a           | <b>56.7</b>   |                        |           | Korea1K       |                        |
| 63477144 | C G     | rs1441805434 | P R     | 17        | 0.084        | B    | 0.474        | T      | 0.340        | 0.103       | Benign          | 2.6           | <b>23.9</b>   |                        |           | TOMMO         |                        |
| 63477150 | T C     | rs1157043147 | L P     | 19        | <b>0.694</b> | P    | 0.054        | T      | <b>0.637</b> | 0.270       | Benign          | n/a           | <b>13.2</b>   |                        |           | dbGaP_PopFreq |                        |
| 63477153 | T G     | rs770640756  | L W     | 20        | <b>0.624</b> | P    | <b>0.002</b> | D      | <b>0.508</b> | 0.120       | <b>Damaging</b> | 1.3           | <b>10.3</b>   |                        |           | ExAC          |                        |
| 63477158 | C G     | rs2049629392 | L V     | 22        | 0.068        | B    | 0.276        | T      | 0.146        | 0.140       | Benign          | n/a           | 0.7           |                        |           | GnomAD        |                        |
| 63477162 | C T     | rs2049629518 | P L     | 23        | 0.000        | B    | 0.633        | T      | 0.139        | 0.023       | Benign          | n/a           | 0.4           |                        |           | TOPMED        |                        |
| 63477164 | C A     | rs2049629589 | P T     | 24        | 0.006        | B    | 0.307        | T      | 0.150        | 0.019       | Benign          | n/a           | <b>71.6</b>   |                        |           | TOMMO         |                        |
| 63477168 | A T     | rs968327653  | Q L     | 25        | 0.000        | B    | 0.405        | T      | 0.119        | 0.014       | Benign          | 1.2           | <b>14.2</b>   |                        |           | dbGaP_PopFreq |                        |
| 63477173 | G A     | rs2049629805 | A T     | 27        | 0.002        | B    | 0.051        | T      | 0.126        | 0.009       | Benign          | n/a           | 0.8           |                        |           | TOPMED        |                        |
| 63477174 | C T     | rs774092241  | A V     | 27        | 0.002        | B    | 0.346        | T      | 0.150        | 0.039       | Benign          | 2.2           | <b>30.3</b>   |                        |           | TOPMED        |                        |
| 63477183 | T C     | rs1196105733 | L S     | 30        | 0.374        | B    | 0.193        | T      | 0.363        | 0.203       | Benign          | n/a           | 0.8           |                        |           | TOPMED        |                        |
| 63477184 | G T     | rs1450600177 | L F     | 30        | <b>0.855</b> | P    | 0.157        | T      | 0.361        | 0.134       | Benign          | n/a           | 0.8           |                        |           | TOPMED        |                        |
| 63477188 | C A     | rs1395554180 | P T     | 32        | 0.002        | B    | 0.159        | T      | 0.359        | 0.132       | Benign          | n/a           | <b>72.5</b>   |                        |           | KOREAN        |                        |
| 63477200 | C A     | rs761292178  | P T     | 36        | <b>0.853</b> | P    | <b>0.010</b> | D      | <b>0.644</b> | 0.157       | <b>Damaging</b> | n/a           | 7.1           |                        |           | dbGaP_PopFreq |                        |
| 63477201 | C T     | rs769008922  | P L     | 36        | <b>0.914</b> | D    | <b>0.006</b> | D      | <b>0.711</b> | 0.216       | <b>Damaging</b> | 1.9           | 7.9           |                        |           | ExAC          |                        |
| 63477207 | A G     | rs1327600431 | N S     | 38        | 0.001        | B    | 0.496        | T      | 0.118        | 0.110       | Benign          | 0.9           | 0.9           |                        |           | GnomAD_exomes |                        |
| 63477215 | G A     | rs926499615  | A T     | 41        | 0.016        | B    | 0.587        | T      | 0.065        | 0.006       | Benign          | 0.9           | 0.9           |                        |           | GnomAD_exomes |                        |

Table S1

|          |   |   |              |   |   |    |       |   |       |   |       |       |          |      |       |               |                        |
|----------|---|---|--------------|---|---|----|-------|---|-------|---|-------|-------|----------|------|-------|---------------|------------------------|
| 63477216 | C | A | rs868524073  | A | D | 41 | 0.012 | B | 0.641 | T | 0.095 | 0.059 | Benign   | n/a  | 870.0 | dbGaP_PopFreq |                        |
| 63477218 | G | A | rs376354160  | D | N | 42 | 0.029 | B | 0.088 | T | 0.234 | 0.102 | Benign   | n/a  | 20.0  | 1000Genomes   |                        |
| 63477220 | C | A | rs1188476738 | D | E | 42 | 0.018 | B | 0.265 | T | 0.200 | 0.069 | Benign   | n/a  | 22.3  | Estonian      |                        |
| 63477222 | A | C | rs1310330954 | E | A | 43 | 0.889 | P | 0.039 | D | 0.281 | 0.279 | Benign   | n/a  | 0.8   | TOPMED        |                        |
| 63477224 | G | A | rs765456530  | A | T | 44 | 0.045 | B | 0.461 | T | 0.079 | 0.045 | Benign   | n/a  | 6.0   | TOPMED        |                        |
| 63477227 | G | T | rs750712925  | G | W | 45 | 0.999 | D | 0.017 | D | 0.589 | 0.276 | Damaging | n/a  | 17.9  | TOMMO         |                        |
| 63477228 | G | A | rs763151946  | G | E | 45 | 0.470 | P | 1.000 | T | 0.525 | 0.192 | Benign   | 0.8  | 6.5   | ExAC          |                        |
| 63477230 | G | A | rs1156835126 | A | T | 46 | 0.879 | P | 0.009 | D | 0.549 | 0.339 | Damaging | n/a  | 4.3   | GnomAD        |                        |
| 63477234 | A | G | rs767353320  | Q | R | 47 | 0.003 | B | 0.733 | T | 0.076 | 0.026 | Benign   | 7.1  | 12.4  | ExAC          | Likely_benign          |
| 63477241 | C | A | rs752407759  | F | L | 49 | 0.858 | P | 0.045 | D | 0.576 | 0.328 | Damaging | 8.7  | 24.4  | ExAC          |                        |
| 63477242 | G | A | rs1412092470 | A | T | 50 | 0.020 | B | 0.231 | T | 0.202 | 0.063 | Benign   | n/a  | 0.8   | TOPMED        |                        |
| 63477245 | C | T | rs1184203291 | Q | X | 51 |       |   | n/a   |   | 0.481 | n/a   |          | n/a  | 0.7   | GnomAD        |                        |
| 63477248 | A | G | rs756108093  | S | G | 52 | 0.049 | B | 0.198 | T | 0.194 | 0.100 | Benign   | 0.8  | 0.8   | GnomAD_exomes |                        |
| 63477249 | G | A | rs777523880  | S | N | 52 | 0.027 | B | 0.408 | T | 0.169 | 0.006 | Benign   | 0.8  | 5.9   | ExAC          |                        |
| 63477250 | C | A | rs368265670  | S | R | 52 | 0.316 | B | 0.263 | T | 0.216 | 0.072 | Benign   | 7.0  | 82.0  | TOPMED        |                        |
| 63477252 | A | G | rs991760634  | Y | C | 53 | 0.950 | D | 0.002 | D | 0.445 | 0.335 |          | n/a  | 0.4   | TOPMED        |                        |
| 63477255 | A | G | rs756763242  | N | S | 54 | 0.173 | B | 0.009 | D | 0.269 | 0.185 | Benign   | n/a  | 6.0   | TOMMO         |                        |
| 63477257 | T | C | rs2049631560 | S | P | 55 | 0.047 | B | 0.050 | T | 0.348 | 0.108 | Benign   | n/a  | 0.4   | TOPMED        |                        |
| 63477258 | C | T | rs886053219  | S | F | 55 | 0.261 | B | 0.011 | D | 0.442 | 0.165 | Benign   | n/a  | 0.8   | TOPMED        | Uncertain_significance |
| 63477261 | G | A | rs1854521219 | S | N | 56 | 0.503 | P | 0.200 | T | 0.194 | 0.062 | Benign   | n/a  | 0.4   | TOPMED        |                        |
| 63477263 | G | A | rs2049631676 | A | T | 57 | 0.191 | B | 0.020 | D | 0.452 | 0.239 | Benign   | n/a  | 0.8   | TOPMED        |                        |
| 63477269 | C | T | rs868134438  | Q | X | 59 |       |   | n/a   |   | 0.627 | n/a   |          | 0.8  | 0.8   | GnomAD_exomes |                        |
| 63477276 | T | A | rs745572589  | L | Q | 61 | 0.046 | B | 0.258 | T | 0.446 | 0.170 | Benign   | 2.5  | 11.2  | ExAC          |                        |
| 63477279 | T | C | rs1345758652 | F | S | 62 | 0.011 | B | 0.229 | T | 0.366 | 0.232 | Benign   | 0.8  | 0.8   | GnomAD_exomes |                        |
| 63477281 | C | T | rs1278390159 | Q | X | 63 |       |   | n/a   |   | 0.598 | n/a   |          | 0.8  | 0.8   | GnomAD_exomes |                        |
| 63477283 | G | C | rs780601919  | Q | H | 63 | 0.618 | P | 0.117 | T | 0.082 | 0.061 | Benign   | 5.2  | 5.7   | ExAC          |                        |
| 63477284 | A | G | rs747292160  | S | G | 64 | 0.104 | B | 0.070 | T | 0.400 | 0.142 | Benign   | n/a  | 5.7   | ExAC          |                        |
| 63477285 | G | A | rs769225220  | S | N | 64 | 0.059 | B | 0.142 | T | 0.183 | 0.048 | Benign   | n/a  | 5.7   | ExAC          |                        |
| 63477287 | G | A | rs776943620  | V | M | 65 | 0.061 | B | 0.162 | T | 0.074 | 0.039 | Benign   | n/a  | 2.2   | GnomAD        |                        |
| 63477290 | G | A | rs1450630173 | A | T | 66 | 0.004 | B | 0.737 | T | 0.110 | 0.065 | Benign   | n/a  | 1.1   | TOPMED        |                        |
| 63477294 | C | G | rs887280103  | A | G | 67 | 0.974 | D | 0.007 | D | 0.586 | 0.354 | Damaging | n/a  | 1.9   | TOPMED        |                        |
| 63477297 | G | T | rs1331734032 | S | I | 68 | 0.920 | D | 0.006 | D | 0.340 | 0.384 |          | n/a  | 0.4   | TOPMED        |                        |
| 63477298 | C | G | rs1170287329 | S | R | 68 | 0.486 | P | 0.088 | T | 0.715 | 0.265 | Benign   | 4.7  | 4.7   | GnomAD_exomes |                        |
| 63477303 | C | T | rs372565955  | A | V | 70 | 0.239 | B | 0.313 | T | 0.096 | 0.130 | Benign   | 16.5 | 157.0 | TOPMED        | Uncertain_significance |
| 63477305 | C | T | rs773257897  | H | Y | 71 | 0.000 | B | 1.000 | T | 0.169 | 0.061 | Benign   | 1.9  | 0.8   | TOPMED        |                        |
| 63477308 | G | T | rs752559637  | D | Y | 72 | 0.692 | P | 0.024 | D | 0.108 | 0.240 | Benign   | 5.9  | 18.6  | ExAC          | Uncertain_significance |
| 63477314 | A | G | rs1331766879 | N | D | 74 | 0.242 | B | 0.253 | T | 0.659 | 0.192 | Benign   | n/a  | 0.7   | GnomAD        |                        |
| 63477315 | A | G | rs1235548322 | N | S | 74 | 0.489 | P | 0.016 | D | 0.607 | 0.245 | Damaging | n/a  | 0.8   | TOPMED        |                        |
| 63477317 | A | T | rs375602836  | I | F | 75 | 0.944 | D | 0.006 | D | 0.470 | 0.335 |          | n/a  | 8.4   | GoESP         |                        |
| 63477318 | T | A | rs2049633221 | I | N | 75 | 0.974 | D | 0.001 | D | 0.660 | 0.334 | Damaging | n/a  | 32.5  | dbGaP_PopFreq |                        |
| 63477320 | A | T | rs1465491488 | T | S | 76 | 0.102 | B | 0.015 | D | 0.414 | 0.168 | Benign   | n/a  | 0.7   | GnomAD        |                        |

Table S1

|          |   |   |              |   |   |     |       |   |       |   |       |       |          |     |       |               |                        |
|----------|---|---|--------------|---|---|-----|-------|---|-------|---|-------|-------|----------|-----|-------|---------------|------------------------|
| 63477323 | G | A | rs867626302  | A | T | 77  | 0.009 | B | 0.019 | D | 0.084 | 0.012 | Benign   | n/a | 2.2   | GnomAD        |                        |
| 63477326 | G | C | rs778615098  | E | Q | 78  | 0.236 | B | 0.070 | T | 0.236 | 0.113 | Benign   | 3.7 | 3.7   | GnomAD_exomes |                        |
| 63477339 | G | T | rs997125723  | R | L | 82  | 0.002 | B | 0.393 | T | 0.141 | 0.052 | Benign   | n/a | 0.4   | TOPMED        |                        |
| 63477341 | C | A | rs1344103805 | Q | K | 83  | 0.032 | B | 0.185 | T | 0.672 | 0.141 | Benign   | n/a | 0.8   | TOPMED        |                        |
| 63477343 | G | C | rs747410284  | Q | H | 83  | 0.914 | D | 0.015 | D | 0.669 | 0.202 | Damaging | n/a | 9.2   | ExAC          |                        |
| 63477931 | G | A | rs1345164089 | E | K | 84  | 0.758 | P | 0.892 | T | 0.529 | 0.141 | Benign   | 0.8 | 0.8   | GnomAD_exomes |                        |
| 63477934 | G | A | rs150382846  | E | K | 85  | 0.173 | B | 0.580 | T | 0.300 | 0.046 | Benign   | 4.1 | 7.7   | GoESP         |                        |
| 63477940 | G | T | rs1440389747 | A | S | 87  | 0.022 | B | 0.817 | T | 0.183 | 0.082 | Benign   | n/a | 0.4   | TOPMED        |                        |
| 63477943 | C | G | rs762976911  | L | V | 88  | 0.077 | B | 0.213 | T | 0.640 | 0.167 | Benign   | 0.4 | 1.2   | ExAC          |                        |
| 63477947 | T | A | rs765857431  | L | H | 89  | 0.914 | D | 0.138 | T | 0.481 | 0.078 | Benign   | 2.9 | 8.3   | ExAC          |                        |
| 63477949 | A | G | rs751050925  | S | G | 90  | 0.016 | B | 0.425 | T | 0.325 | 0.025 | Benign   | 4.1 | 9.3   | ExAC          |                        |
| 63477950 | G | A | rs1221928144 | S | N | 90  | 0.002 | B | 0.543 | T | 0.192 | 0.011 | Benign   | 0.8 | 7.1   | dbGaP_PopFreq |                        |
| 63477952 | C | G | rs1414717313 | Q | E | 91  | 0.122 | B | 1.000 | T | 0.578 | 0.115 | Benign   | n/a | 0.7   | GnomAD        |                        |
| 63477956 | A | G | rs767149889  | E | G | 92  | 0.598 | P | 0.173 | T | 0.309 | 0.136 | Benign   | 0.4 | 1.1   | ExAC          |                        |
| 63477958 | T | G | rs1223622664 | F | V | 93  | 0.917 | D | 0.056 | T | 0.791 | 0.318 |          | 0.4 | 0.4   | GnomAD_exomes |                        |
| 63477962 | C | T | rs753078890  | A | V | 94  | 0.024 | B | 0.280 | T | 0.219 | 0.135 | Benign   | 4.1 | 4.4   | ExAC          |                        |
| 63477967 | G | C | rs756407366  | A | P | 96  | 0.332 | B | 0.225 | T | 0.521 | 0.277 | Benign   | 0.4 | 1.1   | ExAC          |                        |
| 63477968 | C | T | rs1193074438 | A | V | 96  | 0.003 | B | 0.759 | T | 0.214 | 0.104 | Benign   | 0.4 | 0.4   | GnomAD_exomes |                        |
| 63477971 | G | C | rs2049646473 | W | S | 97  | 0.086 | B | 0.328 | T | 0.827 | 0.374 | Benign   | n/a | 0.4   | TOPMED        |                        |
| 63477972 | G | C | rs1471264963 | W | C | 97  | 0.617 | P | 0.085 | T | 0.890 | 0.436 | Benign   | 0.4 | 0.4   | GnomAD_exomes |                        |
| 63477976 | C | G | rs749853877  | Q | E | 99  | 0.002 | B | 0.751 | T | 0.278 | 0.082 | Benign   | 0.8 | 5.7   | GnomAD        |                        |
| 63477979 | A | G | rs1407660027 | K | E | 100 | 0.079 | B | 0.488 | T | 0.611 | 0.132 | Benign   | 0.4 | 0.4   | GnomAD_exomes |                        |
| 63477982 | G | A | rs757757495  | A | T | 101 | 0.357 | B | 0.158 | T | 0.473 | 0.127 | Benign   | 1.6 | 2.1   | ExAC          |                        |
| 63477990 | G | T | rs1439594637 | E | D | 103 | 0.017 | B | 0.418 | T | 0.243 | 0.027 | Benign   | 0.4 | 11.1  | dbGaP_PopFreq |                        |
| 63477995 | A | G | rs1220739409 | Y | C | 105 | 0.769 | P | 0.135 | T | 0.617 | 0.244 | Benign   | n/a | 22.4  | dbGaP_PopFreq |                        |
| 63477998 | A | G | rs1279075366 | E | G | 106 | 0.001 | B | 0.373 | T | 0.190 | 0.101 | Benign   | n/a | 7.1   | dbGaP_PopFreq |                        |
| 63478001 | C | G | rs772201818  | P | R | 107 | 0.383 | B | 0.536 | T | 0.383 | 0.120 | Benign   | 2.9 | 2.9   | GnomAD_exomes |                        |
| 63478011 | G | C | rs780364983  | Q | H | 110 | 0.077 | B | 0.061 | T | 0.265 | 0.073 | Benign   | 0.4 | 1.2   | ExAC          |                        |
| 63478019 | C | T | rs1271259475 | T | M | 113 | 0.174 | B | 0.065 | T | 0.341 | 0.134 | Benign   | 0.4 | 11.1  | dbGaP_PopFreq |                        |
| 63478021 | G | C | rs1568035450 | D | H | 114 | 0.987 | D | 0.004 | D | 0.583 | 0.292 | Damaging | 0.4 | 0.4   | GnomAD_exomes |                        |
| 63478022 | A | C | rs1599137178 | D | A | 114 | 0.842 | P | 0.018 | D | 0.554 | 0.260 | Damaging | n/a | 164.0 | Korea1K       |                        |
| 63478024 | C | T | rs1188044442 | P | S | 115 | 0.053 | B | 0.438 | T | 0.188 | 0.073 | Benign   | n/a | 0.8   | TOPMED        |                        |
| 63478025 | C | G | rs1334067073 | P | R | 115 | 0.520 | P | 0.167 | T | 0.243 | 0.098 | Benign   | 0.4 | 3.1   | dbGaP_PopFreq | Uncertain_significance |
| 63478027 | C | T | rs747960753  | Q | X | 116 |       |   | n/a   |   | 0.865 | n/a   |          | 0.4 | 1.3   | ExAC          |                        |
| 63478033 | C | T | rs1439803774 | R | C | 118 | 0.989 | D | 0.002 | D | 0.566 | 0.167 | Damaging | 0.4 | 0.4   | GnomAD_exomes |                        |
| 63478034 | G | T | rs773121538  | R | L | 118 | 0.376 | B | 0.050 | T | 0.333 | 0.102 | Benign   | 0.4 | 1.6   | TOPMED        | Uncertain_significance |
| 63478039 | A | T | rs762839851  | I | F | 120 | 0.354 | B | 0.186 | T | 0.296 | 0.197 | Benign   | 0.9 | 2.9   | ExAC          |                        |
| 63478040 | T | C | rs770863321  | I | T | 120 | 0.203 | B | 0.109 | T | 0.430 | 0.140 | Benign   | 0.4 | 1.5   | ExAC          |                        |
| 63478042 | A | G | rs539067889  | I | V | 121 | 0.050 | B | 0.046 | D | 0.440 | 0.103 | Benign   | 2.6 | 20.0  | 1000Genomes   |                        |
| 63478043 | T | C | rs1416423148 | I | T | 121 | 0.922 | D | 0.009 | D | 0.694 | 0.347 | Damaging | 0.4 | 0.4   | GnomAD_exomes |                        |
| 63478045 | G | A | rs1170830801 | G | R | 122 | 0.030 | B | 0.549 | T | 0.200 | 0.049 | Benign   | n/a | 4.7   | dbGaP_PopFreq |                        |



Table S1

|          |   |   |              |   |   |     |              |          |              |          |              |              |                 |              |               |               |                        |
|----------|---|---|--------------|---|---|-----|--------------|----------|--------------|----------|--------------|--------------|-----------------|--------------|---------------|---------------|------------------------|
| 63478049 | C | A | rs2049648175 | A | D | 123 | 0.012        | B        | 0.218        | T        | 0.402        | 0.074        | Benign          | n/a          | 0.4           | TOPMED        |                        |
| 63478052 | T | C | rs2049648205 | V | A | 124 | 0.217        | B        | <b>0.005</b> | <b>D</b> | <b>0.552</b> | 0.211        |                 | n/a          | 0.7           | GnomAD        |                        |
| 63478054 | C | T | rs759033270  | R | C | 125 | <b>0.801</b> | <b>P</b> | <b>0.008</b> | <b>D</b> | 0.263        | 0.133        | Benign          | n/a          | 3.4           | ExAC          |                        |
| 63478055 | G | C | rs904130482  | R | P | 125 | <b>0.667</b> | <b>P</b> | <b>0.046</b> | <b>D</b> | <b>0.715</b> | 0.153        | <b>Damaging</b> | n/a          | 0.4           | TOPMED        |                        |
| 63478057 | A | C | rs1599137221 | T | P | 126 | 0.110        | B        | 0.205        | T        | 0.466        | 0.158        | Benign          | n/a          | <b>546.0</b>  | Korea1K       |                        |
| 63478058 | C | T | rs936814960  | T | I | 126 | 0.048        | B        | 0.564        | T        | 0.274        | 0.035        | Benign          | 0.5          | 0.5           | GnomAD_exomes |                        |
| 63478064 | G | C | rs767085054  | G | A | 128 | <b>0.833</b> | <b>P</b> | <b>0.005</b> | <b>D</b> | <b>0.820</b> | 0.318        | <b>Damaging</b> | 2.3          | 3.8           | ExAC          |                        |
| 63478073 | A | C | rs1599137236 | N | T | 131 | 0.360        | B        | 0.699        | T        | <b>0.734</b> | 0.136        | Benign          | n/a          | <b>273.0</b>  | Korea1K       |                        |
| 63478084 | G | A | rs752416873  | A | T | 135 | 0.018        | B        | 0.567        | T        | 0.176        | 0.023        | Benign          | 1.0          | 2.4           | ExAC          |                        |
| 63478087 | A | G | rs2049648986 | K | E | 136 | 0.109        | B        | 0.264        | T        | 0.161        | 0.031        | Benign          | n/a          | 0.8           | TOPMED        |                        |
| 63478088 | A | C | rs760310248  | K | T | 136 | <b>0.634</b> | <b>P</b> | 0.087        | T        | 0.372        | 0.130        | Benign          | 1.5          | 1.5           | GnomAD_exomes |                        |
| 63478090 | C | G | rs764488884  | R | G | 137 | <b>0.747</b> | <b>P</b> | 0.328        | T        | <b>0.577</b> | 0.273        | Benign          | 1.0          | 5.2           | ExAC          |                        |
| 63478091 | G | A | rs556087296  | R | Q | 137 | 0.051        | B        | 0.293        | T        | 0.432        | 0.145        | Benign          | n/a          | <b>20.0</b>   | 1000Genomes   |                        |
| 63478096 | C | G | rs750481872  | Q | E | 139 | 0.071        | B        | 1.000        | T        | 0.238        | 0.028        | Benign          | 1.6          | 5.6           | dbGaP_PopFreq |                        |
| 63479012 | C | G | rs746469812  | N | K | 141 | <b>0.839</b> | <b>P</b> | 0.058        | T        | <b>0.841</b> | 0.278        | Benign          | n/a          | 3.0           | TOPMED        |                        |
| 63479013 | G | A | rs1202551533 | A | T | 142 | 0.082        | B        | 1.000        | T        | 0.179        | 0.041        | Benign          | n/a          | <b>54.6</b>   | Korea1K       |                        |
| 63479023 | G | T | rs768306471  | S | I | 145 | <b>0.994</b> | <b>D</b> | <b>0.018</b> | <b>D</b> | <b>0.821</b> | 0.478        | <b>Damaging</b> | 0.4          | 0.4           | GnomAD_exomes |                        |
| 63479024 | C | A | rs776279706  | S | R | 145 | <b>0.938</b> | <b>D</b> | 0.160        | T        | <b>0.849</b> | 0.315        |                 | 0.4          | 0.9           | ExAC          |                        |
| 63479026 | A | T | rs761366166  | N | I | 146 | 0.148        | B        | 0.075        | T        | <b>0.652</b> | 0.104        | Benign          | 0.8          | 0.9           | ExAC          |                        |
| 63479028 | A | G | rs201716509  | M | V | 147 | <b>0.916</b> | <b>D</b> | <b>0.003</b> | <b>D</b> | <b>0.876</b> | <b>0.593</b> | <b>Damaging</b> | 1.2          | <b>20.0</b>   | 1000Genomes   |                        |
| 63479029 | T | C | rs773425152  | M | T | 147 | <b>0.996</b> | <b>D</b> | <b>0.001</b> | <b>D</b> | <b>0.955</b> | <b>0.621</b> | <b>Damaging</b> | 0.4          | 0.9           | ExAC          |                        |
| 63479032 | G | A | rs147057007  | S | N | 148 | 0.006        | B        | 0.391        | T        | 0.187        | 0.020        | Benign          | 0.4          | 7.7           | GoESP         |                        |
| 63479036 | G | C | rs766945182  | R | S | 149 | 0.146        | B        | 1.000        | T        | 0.405        | 0.100        | Benign          | 6.4          | 8.8           | ExAC          | Uncertain_significance |
| 63479039 | C | G | rs1370591668 | I | M | 150 | <b>0.870</b> | <b>P</b> | <b>0.007</b> | <b>D</b> | <b>0.771</b> | 0.262        | <b>Damaging</b> | 0.4          | 6.2           | dbGaP_PopFreq |                        |
| 63479043 | T | A | rs75214560   | S | T | 152 | 0.258        | B        | <b>0.012</b> | <b>D</b> | 0.441        | 0.195        | Benign          | 0.4          | <b>22.3</b>   | Estonian      |                        |
| 63479046 | A | G | rs767705427  | T | A | 153 | 0.059        | B        | <b>0.034</b> | <b>D</b> | <b>0.587</b> | 0.239        |                 | 1.2          | 4.3           | GnomAD        |                        |
| 63479047 | C | T | rs201277497  | T | I | 153 | <b>0.817</b> | <b>P</b> | <b>0.011</b> | <b>D</b> | <b>0.839</b> | 0.320        | <b>Damaging</b> | 1.2          | 20.0          | 1000Genomes   |                        |
| 63479049 | G | A | rs13306087   | A | T | 154 | 0.330        | B        | 0.091        | T        | 0.461        | 0.139        | Benign          | <b>83.9</b>  | <b>1520.0</b> | PRJEB37584    | Benign                 |
| 63479050 | C | T | rs569318874  | A | V | 154 | <b>0.486</b> | <b>P</b> | <b>0.005</b> | <b>D</b> | 0.408        | 0.174        | Benign          | 0.4          | <b>68.4</b>   | KOREAN        |                        |
| 63479054 | G | C | rs143320537  | K | N | 155 | <b>0.727</b> | <b>P</b> | <b>0.006</b> | <b>D</b> | <b>0.550</b> | 0.250        | <b>Damaging</b> | <b>32.3</b>  | <b>53.9</b>   | TWINSUK       | Uncertain_significance |
| 63479055 | G | T | rs745608171  | V | F | 156 | 0.940        | <b>D</b> | <b>0.004</b> | <b>D</b> | <b>0.909</b> | 0.463        | <b>Damaging</b> | 0.4          | 0.9           | ExAC          |                        |
| 63479059 | G | C | rs2049664994 | C | S | 157 | <b>0.879</b> | <b>P</b> | <b>0.027</b> | <b>D</b> | <b>0.547</b> | 0.349        | <b>Damaging</b> | n/a          | 1.5           | TOPMED        |                        |
| 63479065 | C | A | rs2049665165 | P | H | 159 | 0.025        | B        | 0.104        | T        | <b>0.573</b> | 0.152        | Benign          | n/a          | 6.0           | TOMMO         |                        |
| 63479067 | A | C | rs768220716  | N | H | 160 | 0.154        | B        | <b>0.037</b> | <b>D</b> | <b>0.543</b> | 0.104        |                 | 1.6          | 3.8           | TOPMED        |                        |
| 63479068 | A | G | rs117134739  | N | S | 160 | 0.032        | B        | 0.158        | T        | 0.396        | 0.060        | Benign          | <b>152.2</b> | <b>2460.0</b> | Korea1K       | Benign                 |
| 63479074 | C | T | rs1459787773 | T | I | 162 | 0.296        | B        | 0.231        | T        | <b>0.529</b> | 0.138        | Benign          | 1.6          | 1.6           | TOPMED        |                        |
| 63479077 | C | A | rs1378946788 | A | D | 163 | 0.045        | B        | 0.428        | T        | 0.356        | 0.118        | Benign          | n/a          | 1.1           | TOPMED        |                        |
| 63479085 | T | C | rs1015195326 | W | R | 166 | <b>0.911</b> | <b>D</b> | 0.117        | T        | <b>0.524</b> | 0.419        |                 | n/a          | 0.8           | TOPMED        |                        |
| 63479089 | C | T | rs1362069107 | S | F | 167 | <b>0.924</b> | <b>D</b> | <b>0.021</b> | <b>D</b> | 0.323        | 0.212        |                 | n/a          | 0.7           | GnomAD        |                        |
| 63479092 | T | C | rs139076951  | L | P | 168 | <b>0.996</b> | <b>D</b> | <b>0.001</b> | <b>D</b> | <b>0.992</b> | <b>0.787</b> | <b>Damaging</b> | <b>31.9</b>  | <b>107.0</b>  | PAGE_STUDY    | Uncertain_significance |
| 63479769 | A | G | rs142380421  | D | G | 171 | 0.054        | B        | 0.284        | T        | 0.278        | 0.285        | Benign          | n/a          | 7.7           | GoESP         |                        |

Table S1

|          |   |   |              |   |   |     |       |   |       |   |       |       |          |      |       |               |                        |
|----------|---|---|--------------|---|---|-----|-------|---|-------|---|-------|-------|----------|------|-------|---------------|------------------------|
| 63479775 | C | T | rs1277204441 | T | I | 173 | 0.521 | P | 0.051 | T | 0.313 | 0.164 | Benign   | n/a  | 2.4   | TOPMED        |                        |
| 63479778 | A | G | rs751322397  | N | S | 174 | 0.004 | B | 0.445 | T | 0.092 | 0.094 | Benign   | 0.8  | 3.0   | TOPMED        |                        |
| 63479781 | T | A | rs1346356853 | I | N | 175 | 0.894 | P | 0.001 | D | 0.825 | 0.425 | Damaging | 1.2  | 2.1   | GnomAD        |                        |
| 63479784 | T | C | rs755647501  | L | P | 176 | 0.997 | D | 0.002 | D | 0.599 | 0.581 | Damaging | 0.4  | 0.8   | ExAC          |                        |
| 63479790 | C | T | rs1305248868 | S | F | 178 | 0.198 | B | 0.007 | D | 0.130 | 0.077 | Benign   | 0.8  | 0.8   | GnomAD_exomes |                        |
| 63479793 | C | T | rs374910265  | S | L | 179 | 0.993 | D | 0.001 | D | 0.804 | 0.646 | Damaging | n/a  | 7.7   | GoESP         |                        |
| 63479795 | C | T | rs779454500  | R | X | 180 |       |   | n/a   |   | 0.880 | n/a   |          | 0.8  | 0.8   | ExAC          |                        |
| 63479796 | G | A | rs369022610  | R | Q | 180 | 0.299 | B | 0.012 | D | 0.567 | 0.444 |          | 4.4  | 15.4  | GoESP         |                        |
| 63479799 | G | C | rs1213510652 | S | T | 181 | 0.032 | B | 0.012 | D | 0.368 | 0.155 | Benign   | 0.4  | 0.8   | TOPMED        |                        |
| 63479802 | A | G | rs772645129  | Y | C | 182 | 0.999 | D | 0.007 | D | 0.877 | 0.593 | Damaging | 0.4  | 0.8   | ExAC          |                        |
| 63479804 | G | A | rs12720754   | A | T | 183 | 0.230 | B | 0.525 | T | 0.055 | 0.017 | Benign   | 43.0 | 304.0 | PAGE_STUDY    | Likely_benign          |
| 63479807 | A | G | rs776669133  | M | V | 184 | 0.002 | B | 0.039 | D | 0.070 | 0.062 | Benign   | 0.4  | 0.8   | ExAC          |                        |
| 63479809 | G | A | rs1172383595 | M | I | 184 | 0.002 | B | 0.028 | D | 0.129 | 0.082 | Benign   | 0.4  | 0.7   | GnomAD        |                        |
| 63479810 | C | T | rs762060056  | L | F | 185 | 0.999 | D | 0.008 | D | 0.725 | 0.378 | Damaging | 1.2  | 1.2   | GnomAD_exomes |                        |
| 63479819 | G | A | rs1568036282 | A | T | 188 | 0.294 | B | 0.063 | T | 0.427 | 0.163 | Benign   | n/a  | 0.7   | GnomAD        |                        |
| 63479824 | G | A | rs765401595  | W | X | 189 |       |   | n/a   |   | 0.813 | n/a   |          | 0.4  | 0.8   | ExAC          |                        |
| 63479825 | G | C | rs751371256  | E | Q | 190 | 0.274 | B | 0.137 | T | 0.327 | 0.188 | Benign   | 1.2  | 54.6  | Korea1K       |                        |
| 63479835 | A | G | rs1461565755 | H | R | 193 | 0.853 | P | 0.988 | T | 0.265 | 0.270 | Benign   | 0.4  | 14.2  | dbGaP_PopFreq |                        |
| 63479838 | A | G | rs2049677386 | N | S | 194 | 0.504 | P | 0.238 | T | 0.204 | 0.154 | Benign   | n/a  | 0.4   | TOPMED        |                        |
| 63479840 | G | A | rs767340249  | A | T | 195 | 0.129 | B | 0.161 | T | 0.118 | 0.017 | Benign   | 2.8  | 54.6  | Korea1K       |                        |
| 63479841 | C | T | rs376986357  | A | V | 195 | 0.101 | B | 0.439 | T | 0.131 | 0.041 | Benign   | 4.0  | 68.5  | KOREAN        |                        |
| 63479844 | C | T | rs756060281  | A | V | 196 | 0.006 | B | 1.000 | T | 0.044 | 0.029 | Benign   | 0.8  | 6.0   | TOMMO         |                        |
| 63479847 | G | A | rs753361228  | G | D | 197 | 0.994 | D | 0.002 | D | 0.890 | 0.666 | Damaging | 2.8  | 4.5   | dbGaP_PopFreq | Uncertain_significance |
| 63479849 | A | C | rs778647989  | I | L | 198 | 0.002 | B | 0.303 | T | 0.224 | 0.060 | Benign   | 0.4  | 0.8   | ExAC          |                        |
| 63479853 | C | T | rs553520266  | P | L | 199 | 0.834 | P | 0.016 | D | 0.689 | 0.238 | Damaging | 4.8  | 67.0  | Estonian      |                        |
| 63479858 | A | G | rs2049677865 | K | E | 201 | 0.978 | D | 0.007 | D | 0.382 | 0.249 |          | n/a  | 9.4   | dbGaP_PopFreq |                        |
| 63479859 | A | C | rs769174358  | K | T | 201 | 0.997 | D | 0.006 | D | 0.376 | 0.109 |          | 0.8  | 463.0 | Qatari        |                        |
| 63479862 | C | T | rs148460287  | P | L | 202 | 0.785 | P | 0.040 | D | 0.429 | 0.124 | Benign   | 31.6 | 179.0 | PAGE_STUDY    |                        |
| 63479865 | T | C | rs1175840645 | L | P | 203 | 0.556 | P | 0.227 | T | 0.494 | 0.256 | Benign   | 0.4  | 0.7   | GnomAD        |                        |
| 63479867 | T | A | rs2049678156 | Y | N | 204 | 1.000 | D | 0.000 | D | 0.879 | 0.512 | Damaging | n/a  | 1.4   | GnomAD        |                        |
| 63479870 | G | A | rs763223753  | E | K | 205 | 0.038 | B | 0.788 | T | 0.108 | 0.005 | Benign   | 3.6  | 6.0   | TOMMO         |                        |
| 63479874 | A | T | rs767268916  | D | V | 206 | 0.177 | B | 0.046 | D | 0.196 | 0.084 | Benign   | 0.4  | 0.9   | ExAC          |                        |
| 63479882 | G | A | rs775328930  | A | T | 209 | 0.008 | B | 0.516 | T | 0.067 | 0.004 | Benign   | 0.8  | 1.7   | ExAC          |                        |
| 63479888 | A | G | rs760563261  | S | G | 211 | 0.412 | B | 0.083 | T | 0.870 | 0.220 | Benign   | 0.8  | 1.4   | GnomAD        |                        |
| 63479889 | G | T | rs148144906  | S | I | 211 | 0.976 | D | 0.012 | D | 0.916 | 0.328 | Damaging | 0.8  | 20.0  | 1000Genomes   |                        |
| 63479891 | A | G | rs764076582  | N | D | 212 | 0.988 | D | 0.006 | D | 0.885 | 0.535 | Damaging | 0.4  | 0.9   | ExAC          |                        |
| 63479893 | T | A | rs753408382  | N | K | 212 | 1.000 | D | 0.002 | D | 0.889 | 0.585 | Damaging | 2.0  | 2.7   | ExAC          |                        |
| 63479897 | G | A | rs142677199  | A | T | 214 | 0.962 | D | 0.009 | D | 0.847 | 0.479 | Damaging | 3.2  | 71.1  | dbGaP_PopFreq |                        |
| 63479898 | C | G | rs1354264426 | A | G | 214 | 0.480 | P | 0.221 | T | 0.758 | 0.188 | Benign   | n/a  | 1.6   | TOPMED        |                        |
| 63479904 | A | G | rs2049678808 | K | R | 216 | 0.006 | B | 0.718 | T | 0.073 | 0.020 | Benign   | n/a  | 6.0   | TOMMO         |                        |
| 63479906 | C | G | rs1209300158 | Q | E | 217 | 0.011 | B | 1.000 | T | 0.210 | 0.088 | Benign   | 0.8  | 0.8   | GnomAD_exomes |                        |

Table S1

|          |   |   |              |   |   |     |       |   |       |   |       |       |          |        |        |               |                        |
|----------|---|---|--------------|---|---|-----|-------|---|-------|---|-------|-------|----------|--------|--------|---------------|------------------------|
| 63479912 | G | A | rs750097881  | G | S | 219 | 0.994 | D | 0.010 | D | 0.581 | 0.395 | Damaging | 2.1    | 4.3    | dbGaP_PopFreq |                        |
| 63480337 | G | T | rs769812428  | G | V | 219 | 0.998 | D | 0.001 | D | 0.701 | 0.475 | Damaging | 0.4    | 0.8    | ExAC          |                        |
| 63480339 | T | C | rs772619837  | F | L | 220 | 0.239 | B | 0.105 | T | 0.657 | 0.266 | Benign   | 0.4    | 0.8    | ExAC          |                        |
| 63480345 | G | A | rs765803965  | D | N | 222 | 0.812 | P | 0.088 | T | 0.840 | 0.305 | Benign   | 0.4    | 0.8    | ExAC          |                        |
| 63480349 | C | T | rs759167880  | T | M | 223 | 0.351 | B | 0.349 | T | 0.682 | 0.180 | Benign   | 1.2    | 2.3    | TOPMED        |                        |
| 63480354 | G | T | rs753023714  | A | S | 225 | 0.383 | B | 0.456 | T | 0.111 | 0.131 | Benign   | 5.2    | 6.6    | ExAC          |                        |
| 63480357 | T | C | rs756638375  | Y | H | 226 | 0.980 | D | 0.066 | T | 0.586 | 0.306 |          | 0.4    | 7.1    | dbGaP_PopFreq |                        |
| 63480363 | C | T | rs141543325  | R | C | 228 | 0.994 | D | 0.004 | D | 0.929 | 0.496 | Damaging | 24.3   | 214.0  | PRJEB37766    | Uncertain_significance |
| 63480364 | G | A | rs1455284992 | R | H | 228 | 0.987 | D | 0.012 | D | 0.807 | 0.566 | Damaging | 1.6    | 1.6    | GnomAD_exomes |                        |
| 63480367 | C | T | rs1376819053 | S | F | 229 | 0.441 | B | 0.145 | T | 0.533 | 0.469 | Benign   | 0.4    | 4.7    | dbGaP_PopFreq |                        |
| 63480371 | G | T | rs757421466  | W | C | 230 | 0.635 | P | 0.091 | T | 0.722 | 0.271 | Benign   | 0.8    | 2.8    | dbGaP_PopFreq |                        |
| 63480376 | A | C | rs1160172583 | N | T | 232 | 0.012 | B | 0.027 | D | 0.265 | 0.142 | Benign   | 0.4    | 3.1    | dbGaP_PopFreq |                        |
| 63480378 | T | A | rs901989090  | S | T | 233 | 0.022 | B | 0.407 | T | 0.285 | 0.096 | Benign   | n/a    | 0.4    | TOPMED        |                        |
| 63480379 | C | T | rs998995786  | S | F | 233 | 0.959 | D | 0.176 | T | 0.735 | 0.358 |          | n/a    | 11.9   | TOMMO         |                        |
| 63480381 | C | T | rs778841130  | P | S | 234 | 0.146 | B | 0.403 | T | 0.196 | 0.057 | Benign   | 0.8    | 6.0    | TOMMO         |                        |
| 63480390 | G | A | rs773728684  | E | K | 237 | 0.050 | B | 0.286 | T | 0.372 | 0.048 | Benign   | 1.6    | 27.0   | TWINSUK       |                        |
| 63480396 | G | A | rs77294580   | D | N | 239 | 0.026 | B | 0.136 | T | 0.380 | 0.140 | Benign   | 0.4    | 20.0   | 1000Genomes   |                        |
| 63480402 | G | C | rs763411587  | E | Q | 241 | 0.239 | B | 0.075 | T | 0.658 | 0.257 | Benign   | 0.4    | 25.9   | ALSPAC        |                        |
| 63480405 | C | G | rs749170321  | H | D | 242 | 0.004 | B | 0.448 | T | 0.238 | 0.056 | Benign   | 0.4    | 0.4    | GnomAD_exomes |                        |
| 63480406 | A | C | rs1599139288 | H | P | 242 | 0.119 | B | 0.156 | T | 0.431 | 0.138 | Benign   | n/a    | 328.0  | Korea1K       |                        |
| 63480411 | T | C | rs2049686933 | Y | H | 244 | 0.998 | D | 0.000 | D | 0.641 | 0.429 | Damaging | n/a    | 0.4    | TOPMED        |                        |
| 63480412 | A | G | rs3730025    | Y | C | 244 | 0.998 | D | 0.002 | D | 0.612 | 0.278 | Damaging | 1067.6 | 2230.0 | Estonian      | Benign                 |
| 63480414 | C | G | rs2049687041 | Q | E | 245 | 0.004 | B | 1.000 | T | 0.143 | 0.052 | Benign   | n/a    | 1.1    | TOPMED        |                        |
| 63480421 | T | C | rs1469557705 | L | P | 247 | 0.997 | D | 0.001 | D | 0.873 | 0.534 | Damaging | 0.4    | 0.4    | GnomAD_exomes |                        |
| 63480423 | G | C | rs775849960  | E | Q | 248 | 0.144 | B | 0.258 | T | 0.316 | 0.095 | Benign   | 0.8    | 0.8    | ExAC          |                        |
| 63480427 | C | T | rs760966452  | P | L | 249 | 0.999 | D | 0.002 | D | 0.593 | 0.642 | Damaging | 0.4    | 0.8    | ExAC          |                        |
| 63480429 | C | G | rs1409716305 | L | V | 250 | 0.979 | D | 0.003 | D | 0.784 | 0.514 | Damaging | 0.8    | 0.8    | GnomAD_exomes |                        |
| 63480430 | T | C | rs764359224  | L | P | 250 | 1.000 | D | 0.001 | D | 0.924 | 0.740 | Damaging | 0.4    | 0.8    | ExAC          |                        |
| 63480432 | T | C | rs1279450935 | Y | H | 251 | 1.000 | D | 0.000 | D | 0.859 | 0.668 | Damaging | n/a    | 0.4    | TOPMED        |                        |
| 63480436 | T | C | rs2049687508 | L | P | 252 | 0.997 | D | 0.230 | T | 0.737 | 0.395 |          | n/a    | 0.4    | TOPMED        |                        |
| 63480439 | A | C | rs200907466  | N | T | 253 | 0.915 | D | 0.024 | D | 0.584 | 0.360 | Damaging | n/a    | 109.0  | Korea1K       |                        |
| 63480441 | C | T | rs751023560  | L | F | 254 | 0.993 | D | 0.003 | D | 0.886 | 0.542 | Damaging | 0.4    | 25.9   | ALSPAC        |                        |
| 63480448 | C | T | rs758714422  | A | V | 256 | 0.991 | D | 0.004 | D | 0.681 | 0.528 | Damaging | n/a    | 0.8    | ExAC          |                        |
| 63480452 | C | G | rs780365048  | F | L | 257 | 0.415 | B | 0.005 | D | 0.352 | 0.237 | Benign   | 0.4    | 2.8    | dbGaP_PopFreq |                        |
| 63480453 | G | A | rs747960808  | V | I | 258 | 0.546 | P | 0.039 | D | 0.582 | 0.311 | Damaging | 0.4    | 1.9    | TOPMED        |                        |
| 63480456 | C | T | rs777408360  | R | C | 259 | 1.000 | D | 0.000 | D | 0.897 | 0.513 | Damaging | 1.2    | 3.6    | GnomAD        |                        |
| 63480457 | G | A | rs370903033  | R | H | 259 | 0.995 | D | 0.000 | D | 0.832 | 0.568 | Damaging | 1.2    | 7.7    | GoESP         |                        |
| 63480459 | C | T | rs147670020  | R | C | 260 | 0.805 | P | 0.008 | D | 0.813 | 0.297 | Damaging | 3.2    | 7.7    | GoESP         |                        |
| 63480460 | G | A | rs150011877  | R | H | 260 | 0.426 | B | 0.043 | D | 0.658 | 0.264 |          | 2.4    | 20.0   | 1000Genomes   |                        |
| 63480462 | G | T | rs4303       | A | S | 261 | 0.848 | P | 0.025 | D | 0.141 | 0.089 | Benign   | 741.6  | 6540.0 | HapMap        | Benign                 |
| 63480463 | C | T | rs564933233  | A | V | 261 | 0.589 | P | 0.047 | D | 0.137 | 0.059 | Benign   | 0.8    | 59.9   | 1000Genomes   |                        |

Table S1

|          |   |   |              |   |   |     |       |   |       |   |       |       |          |      |       |               |                        |
|----------|---|---|--------------|---|---|-----|-------|---|-------|---|-------|-------|----------|------|-------|---------------|------------------------|
| 63480468 | C | T | rs1478780828 | H | Y | 263 | 0.010 | B | 1.000 | T | 0.188 | 0.071 | Benign   | n/a  | 7.1   | dbGaP_PopFreq |                        |
| 63480471 | C | T | rs1249291422 | R | C | 264 | 0.972 | D | 0.013 | D | 0.470 | 0.234 |          | 2.8  | 2.8   | GnomAD_exomes |                        |
| 63480472 | G | A | rs776828648  | R | H | 264 | 0.314 | B | 0.029 | D | 0.364 | 0.125 | Benign   | 0.8  | 2.6   | TOPMED        |                        |
| 63480474 | C | T | rs138873311  | R | X | 265 |       |   | n/a   |   | 0.918 | n/a   |          | 1.2  | 15.4  | GoESP         |                        |
| 63480475 | G | A | rs930786156  | R | Q | 265 | 0.162 | B | 0.708 | T | 0.195 | 0.042 | Benign   | 0.4  | 54.6  | Korea1K       |                        |
| 63480478 | A | G | rs373616533  | Y | C | 266 | 1.000 | D | 0.002 | D | 0.901 | 0.649 | Damaging | 0.8  | 7.7   | GoESP         |                        |
| 63480480 | G | A | rs149412997  | G | R | 267 | 0.973 | D | 0.004 | D | 0.879 | 0.663 | Damaging | 33.0 | 117.0 | TOPMED        | Uncertain_significance |
| 63480483 | G | A | rs1403582878 | D | N | 268 | 0.146 | B | 0.083 | T | 0.336 | 0.067 | Benign   | n/a  | 0.7   | GnomAD        |                        |
| 63480485 | C | G | rs766561924  | D | E | 268 | 0.025 | B | 0.691 | T | 0.150 | 0.021 | Benign   | 0.4  | 0.8   | ExAC          |                        |
| 63480489 | T | A | rs2049688901 | Y | N | 270 | 0.119 | B | 0.074 | T | 0.698 | 0.253 | Benign   | n/a  | 6.0   | TOMMO         |                        |
| 63480492 | A | G | rs530535736  | I | V | 271 | 0.065 | B | 0.380 | T | 0.187 | 0.052 | Benign   | 0.8  | 39.9  | 1000Genomes   |                        |
| 63480504 | G | A | rs1316614976 | G | R | 275 | 0.897 | P | 0.006 | D | 0.851 | 0.594 | Damaging | n/a  | 2.1   | GnomAD        |                        |
| 63480507 | C | G | rs777657188  | P | A | 276 | 0.371 | B | 0.225 | T | 0.673 | 0.318 | Benign   | 0.8  | 0.8   | TOPMED        |                        |
| 63480510 | A | G | rs757233793  | I | V | 277 | 0.753 | P | 0.007 | D | 0.570 | 0.348 | Damaging | 1.2  | 1.7   | ExAC          |                        |
| 63480513 | C | A | rs1229110590 | P | T | 278 | 1.000 | D | 0.000 | D | 0.950 | 0.854 | Damaging | 0.4  | 0.4   | GnomAD_exomes |                        |
| 63480520 | A | G | rs1303022378 | H | R | 280 | 0.999 | D | 0.001 | D | 0.923 | 0.601 | Damaging | n/a  | 0.8   | TOPMED        |                        |
| 63480523 | T | A | rs778759109  | L | Q | 281 | 1.000 | D | 0.001 | D | 0.929 | 0.687 | Damaging | 0.8  | 1.7   | ExAC          |                        |
| 63480526 | T | C | rs1040577967 | L | P | 282 | 0.999 | D | 0.001 | D | 0.969 | 0.737 | Damaging | n/a  | 7.1   | dbGaP_PopFreq |                        |
| 63481096 | A | G | rs923234679  | M | V | 285 | 0.712 | P | 0.003 | D | 0.904 | 0.531 | Damaging | n/a  | 2.8   | dbGaP_PopFreq |                        |
| 63481097 | T | C | rs747832023  | M | T | 285 | 1.000 | D | 0.001 | D | 0.959 | 0.691 | Damaging | 1.2  | 3.1   | dbGaP_PopFreq |                        |
| 63481098 | G | A | rs1749235389 | M | I | 285 | 0.712 | P | 0.005 | D | 0.892 | 0.405 | Damaging | n/a  | 0.8   | TOPMED        |                        |
| 63481099 | T | G | rs1365148386 | W | G | 286 | 0.999 | D | 0.000 | D | 0.933 | 0.763 | Damaging | 0.4  | 0.4   | GnomAD_exomes |                        |
| 63481102 | G | T | rs1218416633 | A | S | 287 | 0.690 | P | 0.247 | T | 0.394 | 0.188 | Benign   | 0.4  | 11.1  | dbGaP_PopFreq |                        |
| 63481103 | C | T | rs770340552  | A | V | 287 | 0.987 | D | 0.003 | D | 0.772 | 0.404 | Damaging | 0.4  | 0.8   | ExAC          |                        |
| 63481106 | A | G | rs199591851  | Q | R | 288 | 0.998 | D | 0.147 | T | 0.408 | 0.327 | Benign   | 74.4 | 987.0 | FINRISK       |                        |
| 63481109 | G | A | rs763587114  | S | N | 289 | 0.354 | B | 0.270 | T | 0.446 | 0.122 | Benign   | 0.4  | 0.8   | ExAC          |                        |
| 63481112 | G | C | rs1266264733 | W | S | 290 | 1.000 | D | 0.000 | D | 0.931 | 0.722 | Damaging | 0.4  | 0.4   | GnomAD_exomes |                        |
| 63481114 | G | A | rs1464640594 | E | K | 291 | 0.194 | B | 0.786 | T | 0.394 | 0.059 | Benign   | 0.4  | 0.4   | GnomAD_exomes |                        |
| 63481115 | A | C | rs771517816  | E | A | 291 | 0.172 | B | 0.690 | T | 0.421 | 0.093 | Benign   | 0.4  | 0.8   | ExAC          |                        |
| 63481126 | G | A | rs989500910  | D | N | 295 | 0.308 | B | 0.207 | T | 0.497 | 0.125 | Benign   | 0.4  | 14.2  | dbGaP_PopFreq |                        |
| 63481129 | A | G | rs1190943736 | M | V | 296 | 0.011 | B | 0.047 | D | 0.544 | 0.040 |          | 0.4  | 9.4   | dbGaP_PopFreq |                        |
| 63481132 | G | A | rs61740982   | V | M | 297 | 0.267 | B | 0.420 | T | 0.301 | 0.078 | Benign   | 4.8  | 39.9  | 1000Genomes   |                        |
| 63481135 | G | T | rs752924819  | V | L | 298 | 0.054 | B | 0.259 | T | 0.612 | 0.032 | Benign   | 0.8  | 1.4   | GnomAD        |                        |
| 63481138 | C | A | rs760860250  | P | T | 299 | 0.983 | D | 0.000 | D | 0.945 | 0.903 | Damaging | 0.4  | 0.8   | ExAC          |                        |
| 63481147 | G | T | rs139813210  | D | Y | 302 | 0.890 | P | 0.031 | D | 0.648 | 0.111 | Damaging | 0.4  | 7.7   | GoESP         |                        |
| 63481154 | C | T | rs1419966263 | P | L | 304 | 0.105 | B | 0.009 | D | 0.779 | 0.258 |          | n/a  | 0.4   | TOPMED        |                        |
| 63481157 | A | G | rs141186617  | N | S | 305 | 0.000 | B | 0.839 | T | 0.281 | 0.047 | Benign   | 2.8  | 11.3  | TOPMED        |                        |
| 63481160 | T | G | rs1044992578 | L | R | 306 | 0.315 | B | 0.002 | D | 0.922 | 0.351 |          | n/a  | 0.7   | GnomAD        |                        |
| 63481162 | G | A | rs532619151  | D | N | 307 | 0.875 | P | 0.000 | D | 0.704 | 0.388 | Damaging | 0.4  | 20.0  | 1000Genomes   |                        |
| 63481163 | A | G | rs754511687  | D | G | 307 | 0.995 | D | 0.000 | D | 0.968 | 0.629 | Damaging | 0.8  | 2.5   | ExAC          |                        |
| 63481168 | A | G | rs747796419  | T | A | 309 | 0.700 | P | 0.004 | D | 0.682 | 0.428 | Damaging | 0.4  | 0.8   | ExAC          |                        |

Table S1

|          |   |   |              |   |   |     |       |   |       |   |       |       |          |       |        |                |                        |
|----------|---|---|--------------|---|---|-----|-------|---|-------|---|-------|-------|----------|-------|--------|----------------|------------------------|
| 63481171 | A | G | rs144137849  | S | G | 310 | 0.009 | B | 0.342 | T | 0.279 | 0.019 | Benign   | 17.5  | 859.0  | TOMMO          | Uncertain_significance |
| 63481172 | G | A | rs774789681  | S | N | 310 | 0.003 | B | 0.588 | T | 0.202 | 0.034 | Benign   | 0.4   | 3.2    | TOPMED         |                        |
| 63481175 | C | G | rs746377185  | T | S | 311 | 0.008 | B | 0.425 | T | 0.276 | 0.050 | Benign   | 1.2   | 3.3    | ExAC           |                        |
| 63481177 | A | G | rs367998749  | M | V | 312 | 0.738 | P | 0.004 | D | 0.784 | 0.571 | Damaging | 2.4   | 7.7    | GoESP          |                        |
| 63481178 | T | C | rs201588518  | M | T | 312 | 0.999 | D | 0.001 | D | 0.950 | 0.660 | Damaging | 1.6   | 39.9   | 1000Genomes    |                        |
| 63481186 | C | T | rs760913528  | Q | X | 315 |       |   | n/a   |   | 0.936 | n/a   |          | 0.4   | 0.8    | ExAC           |                        |
| 63481566 | G | T | rs561813163  | G | C | 316 | 0.994 | D | 0.001 | D | 0.756 | 0.415 | Damaging | 0.4   | 20.0   | 1000Genomes    |                        |
| 63481567 | G | T | rs2049710108 | G | V | 316 | 0.989 | D | 0.001 | D | 0.758 | 0.416 | Damaging | n/a   | 0.4    | TOPMED         |                        |
| 63481570 | G | A | rs1414333467 | W | X | 317 |       |   | n/a   |   | 0.925 | n/a   |          | n/a   | 0.8    | TOPMED         |                        |
| 63481575 | G | T | rs34126458   | A | S | 319 | 0.120 | B | 0.052 | T | 0.581 | 0.170 | Benign   | 74.3  | 90.3   | dbGaP_PopFreq  | Likely_benign          |
| 63481576 | C | T | rs2049710282 | A | V | 319 | 0.019 | B | 0.259 | T | 0.406 | 0.057 | Benign   | n/a   | 0.4    | TOPMED         |                        |
| 63481578 | A | G | rs1384833654 | T | A | 320 | 0.030 | B | 0.710 | T | 0.659 | 0.212 | Benign   | n/a   | 0.7    | GnomAD         |                        |
| 63481579 | C | T | rs139137100  | T | M | 320 | 0.163 | B | 0.150 | T | 0.661 | 0.143 | Benign   | 0.4   | 7.7    | GoESP          |                        |
| 63481581 | C | T | rs2049710489 | H | Y | 321 | 0.102 | B | 0.011 | D | 0.452 | 0.216 | Benign   | n/a   | 0.7    | GnomAD         |                        |
| 63481584 | A | G | rs1391141938 | M | V | 322 | 0.738 | P | 0.004 | D | 0.940 | 0.642 | Damaging | 0.8   | 0.8    | GnomAD_exomes  |                        |
| 63481590 | C | T | rs35141294   | R | W | 324 | 0.975 | D | 0.047 | D | 0.530 | 0.097 | Damaging | 202.1 | 1850.0 | Qatari         | Benign                 |
| 63481591 | G | A | rs374029266  | R | Q | 324 | 0.028 | B | 0.368 | T | 0.456 | 0.054 | Benign   | 3.2   | 20.0   | 1000Genomes    |                        |
| 63481593 | G | A | rs771762179  | V | M | 325 | 0.207 | B | 0.281 | T | 0.659 | 0.109 | Benign   | 0.4   | 0.8    | ExAC           |                        |
| 63481596 | G | A | rs1273653682 | A | T | 326 | 0.940 | D | 0.006 | D | 0.643 | 0.258 | Damaging | 1.6   | 1.6    | GnomAD_exomes  |                        |
| 63481602 | G | A | rs992848550  | E | K | 328 | 0.240 | B | 0.296 | T | 0.502 | 0.125 | Benign   | 0.4   | 2.8    | dbGaP_PopFreq  |                        |
| 63481610 | C | A | rs763740829  | F | L | 330 | 0.954 | D | 0.004 | D | 0.927 | 0.557 | Damaging | 3.6   | 3.6    | GnomAD_exomes  |                        |
| 63481612 | C | G | rs1444816395 | T | S | 331 | 0.030 | B | 0.244 | T | 0.515 | 0.106 | Benign   | n/a   | 0.7    | GnomAD         |                        |
| 63481615 | C | T | rs2049711073 | S | F | 332 | 0.986 | D | 0.029 | D | 0.893 | 0.589 | Damaging | n/a   | 4.7    | dbGaP_PopFreq  |                        |
| 63481617 | C | G | rs983222441  | L | V | 333 | 0.824 | P | 0.109 | T | 0.846 | 0.290 | Benign   | n/a   | 0.7    | GnomAD         |                        |
| 63481618 | T | A | rs761390621  | L | Q | 333 | 1.000 | D | 0.001 | D | 0.971 | 0.723 | Damaging | 0.8   | 2.8    | dbGaP_PopFreq  |                        |
| 63481620 | G | C | rs1336871330 | E | Q | 334 | 0.295 | B | 0.003 | D | 0.384 | 0.145 | Benign   | n/a   | 0.7    | GnomAD         |                        |
| 63481629 | C | T | rs764882826  | P | S | 337 | 0.077 | B | 0.426 | T | 0.500 | 0.110 | Benign   | n/a   | 6.0    | TOMMO          |                        |
| 63481630 | C | T | rs750754792  | P | L | 337 | 0.626 | P | 0.094 | T | 0.478 | 0.183 | Benign   | 1.2   | 1.2    | GnomAD_exomes  |                        |
| 63481632 | A | G | rs1414191617 | M | V | 338 | 0.307 | B | 0.017 | D | 0.549 | 0.193 |          | n/a   | 1.5    | TOPMED         |                        |
| 63481634 | G | A | rs1422578392 | M | I | 338 | 0.797 | P | 0.022 | D | 0.692 | 0.261 | Damaging | n/a   | 0.7    | GnomAD         |                        |
| 63481635 | C | T | rs1455859263 | P | S | 339 | 0.392 | B | 0.066 | T | 0.676 | 0.330 | Benign   | 0.8   | 11.9   | TOMMO          |                        |
| 63481641 | G | C | rs201456235  | E | Q | 341 | 0.172 | B | 0.126 | T | 0.704 | 0.182 | Benign   | n/a   | 11.9   | TOMMO          |                        |
| 63481645 | T | C | rs755446607  | F | S | 342 | 1.000 | D | 0.000 | D | 0.960 | 0.742 | Damaging | 0.4   | 0.8    | ExAC           |                        |
| 63481648 | G | A | rs200225958  | W | X | 343 |       |   | n/a   |   | 0.913 | n/a   |          | 0.8   | 20.0   | 1000Genomes    |                        |
| 63481657 | C | T | rs781272495  | S | L | 346 | 0.994 | D | 0.001 | D | 0.931 | 0.692 | Damaging | 1.2   | 4.7    | dbGaP_PopFreq  |                        |
| 63481663 | T | C | rs769913687  | L | P | 348 | 0.995 | D | 0.002 | D | 0.968 | 0.690 | Damaging | 0.4   | 0.8    | ExAC           |                        |
| 63481666 | A | C | rs778126198  | E | A | 349 | 0.203 | B | 0.107 | T | 0.639 | 0.271 | Benign   | 0.4   | 0.8    | ExAC           |                        |
| 63481668 | A | C | rs2049712159 | K | Q | 350 | 0.060 | B | 0.005 | D | 0.674 | 0.288 |          | n/a   | 0.4    | TOPMED         |                        |
| 63481672 | C | T | rs2229839    | P | L | 351 | 0.832 | P | 0.002 | D | 0.909 | 0.466 | Damaging | 23.9  | 333.0  | NorthernSweden | Uncertain_significance |
| 63481675 | C | A | rs2049712318 | A | D | 352 | 0.004 | B | 0.650 | T | 0.254 | 0.049 | Benign   | n/a   | 0.4    | TOPMED         |                        |
| 63481677 | G | A | rs148193919  | D | N | 353 | 0.249 | B | 0.002 | D | 0.559 | 0.288 |          | 50.5  | 506.0  | PRJEB37584     | Likely_benign          |



Table S1

|          |   |   |              |   |   |     |       |   |       |   |       |       |          |       |        |                |                        |
|----------|---|---|--------------|---|---|-----|-------|---|-------|---|-------|-------|----------|-------|--------|----------------|------------------------|
| 63481680 | G | A | rs56394458   | G | R | 354 | 0.998 | D | 0.003 | D | 0.650 | 0.318 | Damaging | 780.4 | 3640.0 | FINRISK        | Benign                 |
| 63481683 | C | T | rs776297611  | R | W | 355 | 0.993 | D | 0.000 | D | 0.909 | 0.486 | Damaging | 2.0   | 5.6    | dbGaP_PopFreq  |                        |
| 63481684 | G | A | rs761322765  | R | Q | 355 | 0.487 | P | 0.067 | T | 0.837 | 0.396 | Benign   | 1.6   | 7.1    | dbGaP_PopFreq  |                        |
| 63481686 | G | A | rs553718986  | E | K | 356 | 0.114 | B | 0.270 | T | 0.740 | 0.227 | Benign   | 0.4   | 20.0   | 1000Genomes    |                        |
| 63481689 | G | A | rs1273328602 | V | M | 357 | 0.296 | B | 0.084 | T | 0.478 | 0.191 | Benign   | n/a   | 0.7    | GnomAD         |                        |
| 63481692 | G | A | rs764651696  | V | M | 358 | 0.928 | D | 0.002 | D | 0.833 | 0.429 | Damaging | 1.2   | 2.5    | ExAC           |                        |
| 63481698 | C | T | rs199690936  | H | Y | 360 | 0.442 | B | 0.001 | D | 0.882 | 0.450 |          | 0.4   | 20.0   | 1000Genomes    |                        |
| 63481699 | A | G | rs2049713014 | H | R | 360 | 0.456 | P | 0.003 | D | 0.923 | 0.550 | Damaging | n/a   | 0.4    | TOPMED         |                        |
| 63481701 | G | A | rs546455400  | A | T | 361 | 0.992 | D | 0.005 | D | 0.952 | 0.541 | Damaging | 6.0   | 20.0   | 1000Genomes    |                        |
| 63481704 | T | A | rs1274888100 | S | T | 362 | 0.460 | P | 0.121 | T | 0.816 | 0.374 | Benign   | n/a   | 0.8    | TOPMED         |                        |
| 63481705 | C | G | rs142328237  | S | W | 362 | 1.000 | D | 0.000 | D | 0.888 | 0.684 | Damaging | 6.8   | 59.9   | 1000Genomes    |                        |
| 63481707 | G | C | rs1443267419 | A | P | 363 | 0.999 | D | 0.000 | D | 0.962 | 0.649 | Damaging | n/a   | 0.4    | TOPMED         |                        |
| 63481708 | C | T | rs370491569  | A | V | 363 | 0.999 | D | 0.000 | D | 0.927 | 0.522 | Damaging | 1.2   | 7.7    | GoESP          |                        |
| 63481712 | G | T | rs1325867826 | W | C | 364 | 0.996 | D | 0.001 | D | 0.922 | 0.654 | Damaging | n/a   | 0.4    | TOPMED         |                        |
| 63481723 | A | G | rs369713789  | N | S | 368 | 0.098 | B | 0.104 | T | 0.806 | 0.206 | Benign   | 0.8   | 2.5    | ExAC           |                        |
| 63481724 | C | G | rs1482676646 | N | K | 368 | 0.557 | P | 0.098 | T | 0.849 | 0.254 | Benign   | 0.4   | 1.1    | TOPMED         |                        |
| 63481725 | A | G | rs373357172  | R | G | 369 | 0.098 | B | 0.516 | T | 0.606 | 0.207 | Benign   | n/a   | 7.7    | GoESP          |                        |
| 63481729 | A | G | rs1176719016 | K | R | 370 | 0.008 | B | 0.260 | T | 0.380 | 0.057 | Benign   | 0.4   | 0.4    | GnomAD_exomes  |                        |
| 63482466 | G | T | rs189243320  | R | S | 373 | 1.000 | D | 0.000 | D | 0.948 | 0.646 | Damaging | 3.2   | 39.9   | 1000Genomes    |                        |
| 63482471 | A | G | rs778168348  | K | R | 375 | 0.983 | D | 0.000 | D | 0.687 | 0.502 | Damaging | 0.4   | 27.0   | TWINSUK        |                        |
| 63482482 | C | T | rs750724647  | R | W | 379 | 0.983 | D | 0.014 | D | 0.423 | 0.094 |          | 4.4   | 22.3   | Estonian       | Uncertain_significance |
| 63482483 | G | A | rs13306085   | R | Q | 379 | 0.040 | B | 0.534 | T | 0.121 | 0.021 | Benign   | 2.4   | 68.4   | KOREAN         |                        |
| 63482486 | T | A | rs752385390  | V | D | 380 | 0.776 | P | 0.001 | D | 0.819 | 0.577 | Damaging | 0.4   | 0.8    | ExAC           |                        |
| 63482489 | C | T | rs150466411  | T | M | 381 | 0.988 | D | 0.001 | D | 0.751 | 0.355 | Damaging | 84.8  | 667.0  | NorthernSweden |                        |
| 63482491 | A | G | rs370890237  | M | V | 382 | 0.236 | B | 0.063 | T | 0.793 | 0.248 | Benign   | 0.4   | 15.4   | GoESP          |                        |
| 63482492 | T | C | rs2049726728 | M | T | 382 | 0.291 | B | 0.045 | D | 0.886 | 0.512 | Damaging | n/a   | 0.4    | TOPMED         |                        |
| 63482493 | G | A | rs770475936  | M | I | 382 | 0.316 | B | 0.023 | D | 0.757 | 0.245 |          | 0.4   | 0.8    | ExAC           |                        |
| 63482494 | G | T | rs2049726795 | D | Y | 383 | 0.947 | D | 0.003 | D | 0.457 | 0.323 |          | n/a   | 1.1    | TOPMED         |                        |
| 63482495 | A | G | rs374899854  | D | G | 383 | 0.216 | B | 0.141 | T | 0.316 | 0.145 | Benign   | 0.4   | 0.8    | ExAC           |                        |
| 63482506 | A | G | rs1347736201 | T | A | 387 | 0.355 | B | 0.008 | D | 0.846 | 0.382 |          | n/a   | 7.1    | dbGaP_PopFreq  |                        |
| 63482514 | C | A | rs1405848294 | H | Q | 389 | 1.000 | D | 0.000 | D | 0.773 | 0.548 | Damaging | n/a   | 0.7    | GnomAD         |                        |
| 63482522 | T | C | rs138418851  | M | T | 392 | 0.991 | D | 0.001 | D | 0.841 | 0.773 | Damaging | 4.0   | 7.6    | PAGE_STUDY     |                        |
| 63482525 | G | A | rs2049727156 | G | D | 393 | 0.999 | D | 0.001 | D | 0.979 | 0.887 | Damaging | n/a   | 0.7    | GnomAD         |                        |
| 63482528 | A | G | rs775932125  | H | R | 394 | 0.977 | D | 0.000 | D | 0.935 | 0.758 | Damaging | 0.8   | 0.8    | ExAC           |                        |
| 63482532 | A | G | rs760885341  | I | M | 395 | 0.896 | P | 0.004 | D | 0.389 | 0.251 | Benign   | 0.4   | 0.8    | ExAC           |                        |
| 63482533 | C | T | rs769063911  | Q | X | 396 |       |   | n/a   |   | 0.808 | n/a   |          | 0.4   | 1.1    | TOPMED         |                        |
| 63482545 | C | A | rs771386010  | Q | K | 400 | 0.334 | B | 0.196 | T | 0.920 | 0.505 |          | 1.2   | 25.9   | ALSPAC         |                        |
| 63482546 | A | G | rs548450663  | Q | R | 400 | 0.436 | B | 0.128 | T | 0.899 | 0.625 |          | 0.4   | 20.0   | 1000Genomes    |                        |
| 63482549 | A | G | rs765449601  | Y | C | 401 | 0.986 | D | 0.000 | D | 0.923 | 0.733 | Damaging | 1.2   | 1.7    | ExAC           |                        |
| 63482552 | A | T | rs1329993082 | K | M | 402 | 0.940 | D | 0.010 | D | 0.793 | 0.619 | Damaging | 0.8   | 0.8    | GnomAD_exomes  |                        |
| 63482555 | A | C | rs763292265  | D | A | 403 | 0.045 | B | 0.087 | T | 0.421 | 0.141 | Benign   | 0.8   | 0.8    | ExAC           |                        |

Table S1

|          |   |   |              |   |   |     |       |   |       |   |       |       |          |      |       |               |                        |
|----------|---|---|--------------|---|---|-----|-------|---|-------|---|-------|-------|----------|------|-------|---------------|------------------------|
| 63482557 | C | G | rs1229622121 | L | V | 404 | 0.112 | B | 0.022 | D | 0.195 | 0.164 | Benign   | n/a  | 0.7   | GnomAD        |                        |
| 63482561 | C | G | rs766454164  | P | R | 405 | 0.996 | D | 0.006 | D | 0.599 | 0.289 | Damaging | 0.8  | 4.3   | dbGaP_PopFreq |                        |
| 63482563 | G | A | rs201117983  | V | I | 406 | 0.050 | B | 0.283 | T | 0.126 | 0.111 | Benign   | 30.6 | 274.0 | KOREAN        | Uncertain_significance |
| 63482567 | C | T | rs570424963  | S | F | 407 | 0.354 | B | 0.616 | T | 0.385 | 0.170 | Benign   | 0.8  | 20.0  | 1000Genomes   |                        |
| 63482570 | T | C | rs2049728056 | L | P | 408 | 0.999 | D | 0.001 | D | 0.677 | 0.466 | Damaging | n/a  | 0.4   | TOPMED        |                        |
| 63482572 | C | T | rs199746395  | R | C | 409 | 1.000 | D | 0.000 | D | 0.899 | 0.606 | Damaging | 2.4  | 4.8   | TOPMED        |                        |
| 63482573 | G | A | rs371833006  | R | H | 409 | 0.995 | D | 0.002 | D | 0.800 | 0.607 | Damaging | 4.8  | 34.2  | KOREAN        |                        |
| 63482575 | C | T | rs370836540  | R | W | 410 | 0.783 | P | 0.015 | D | 0.243 | 0.133 | Benign   | 2.8  | 7.7   | GoESP         |                        |
| 63482576 | G | A | rs145172277  | R | Q | 410 | 0.004 | B | 0.557 | T | 0.058 | 0.065 | Benign   | 23.1 | 182.0 | PRJEB37766    | Uncertain_significance |
| 63482578 | G | A | rs1347844823 | G | R | 411 | 1.000 | D | 0.002 | D | 0.925 | 0.595 | Damaging | 0.4  | 0.4   | GnomAD_exomes |                        |
| 63482581 | G | T | rs779643154  | A | S | 412 | 0.987 | D | 0.006 | D | 0.632 | 0.557 | Damaging | 0.4  | 0.8   | ExAC          |                        |
| 63482585 | A | G | rs1308632106 | N | S | 413 | 0.848 | P | 0.019 | D | 0.789 | 0.436 | Damaging | 2.0  | 15.1  | TOPMED        |                        |
| 63482586 | C | G | rs1352223425 | N | K | 413 | 1.000 | D | 0.004 | D | 0.888 | 0.518 | Damaging | 1.6  | 1.6   | GnomAD_exomes |                        |
| 63482590 | G | A | rs149252911  | G | S | 415 | 0.990 | D | 0.007 | D | 0.876 | 0.597 | Damaging | 5.6  | 59.9  | 1000Genomes   |                        |
| 63482591 | G | A | rs1350271986 | G | D | 415 | 0.999 | D | 0.001 | D | 0.947 | 0.650 | Damaging | 0.4  | 0.4   | GnomAD_exomes |                        |
| 63482597 | A | G | rs1229041283 | H | R | 417 | 0.910 | D | 0.000 | D | 0.899 | 0.613 | Damaging | 0.4  | 0.7   | GnomAD        |                        |
| 63482599 | G | A | rs1599141410 | E | K | 418 | 0.998 | D | 0.000 | D | 0.803 | 0.683 | Damaging | n/a  | 54.6  | Korea1K       |                        |
| 63482602 | G | T | rs1311367540 | A | S | 419 | 0.963 | D | 0.006 | D | 0.754 | 0.470 | Damaging | n/a  | 7.1   | dbGaP_PopFreq |                        |
| 63482605 | A | G | rs2049728955 | I | V | 420 | 0.266 | B | 0.787 | T | 0.182 | 0.211 | Benign   | n/a  | 23.9  | TOMMO         |                        |
| 63482606 | T | C | rs144494842  | I | T | 420 | 0.996 | D | 0.002 | D | 0.777 | 0.662 | Damaging | 21.9 | 79.9  | 1000Genomes   | Uncertain_significance |
| 63482609 | G | A | rs2049729061 | G | E | 421 | 0.999 | D | 0.001 | D | 0.949 | 0.660 | Damaging | n/a  | 6.0   | TOMMO         |                        |
| 63482614 | G | A | rs148018765  | V | M | 423 | 0.697 | P | 0.008 | D | 0.632 | 0.293 | Damaging | 7.6  | 15.4  | GoESP         |                        |
| 63482621 | C | T | rs372626836  | A | V | 425 | 0.811 | P | 0.004 | D | 0.402 | 0.349 | Benign   | 2.8  | 463.0 | Qatari        |                        |
| 63482624 | T | G | rs1295075641 | L | R | 426 | 1.000 | D | 0.001 | D | 0.968 | 0.813 | Damaging | n/a  | 0.8   | TOPMED        |                        |
| 63482627 | C | T | rs1484293906 | S | L | 427 | 0.995 | D | 0.001 | D | 0.879 | 0.723 | Damaging | 2.4  | 8.7   | TOPMED        |                        |
| 63482629 | G | C | rs1368163348 | V | L | 428 | 0.916 | D | 0.007 | D | 0.733 | 0.462 | Damaging | n/a  | 0.4   | TOPMED        |                        |
| 63482630 | T | G | rs774484341  | V | G | 428 | 0.997 | D | 0.000 | D | 0.649 | 0.719 | Damaging | 2.8  | 5.6   | dbGaP_PopFreq |                        |
| 63482633 | C | T | rs1430341434 | S | F | 429 | 0.316 | B | 0.052 | T | 0.901 | 0.552 |          | n/a  | 1.4   | GnomAD        |                        |
| 63482638 | C | T | rs1599141452 | P | S | 431 | 0.883 | P | 0.003 | D | 0.791 | 0.538 | Damaging | n/a  | 54.6  | Korea1K       |                        |
| 63482639 | C | T | rs2049729701 | P | L | 431 | 0.907 | P | 0.003 | D | 0.608 | 0.425 | Damaging | n/a  | 0.4   | TOPMED        | Uncertain_significance |
| 63482645 | A | G | rs763905584  | H | R | 433 | 0.928 | D | 0.002 | D | 0.847 | 0.660 | Damaging | 0.8  | 6.0   | TOMMO         |                        |
| 63482647 | C | G | rs753578845  | L | V | 434 | 0.859 | P | 0.000 | D | 0.788 | 0.482 | Damaging | 10.7 | 10.7  | GnomAD_exomes |                        |
| 63482651 | A | T | rs757195769  | H | L | 435 | 0.019 | B | 0.253 | T | 0.227 | 0.219 | Benign   | 0.4  | 0.8   | ExAC          |                        |
| 63482653 | A | T | rs1427700343 | K | X | 436 |       |   |       |   | 0.833 | n/a   |          | 0.8  | 0.8   | GnomAD_exomes |                        |
| 63482654 | A | G | rs765088731  | K | R | 436 | 0.077 | B | 0.089 | T | 0.399 | 0.059 | Benign   | 0.4  | 0.8   | ExAC          |                        |
| 63482659 | G | A | rs1051245483 | G | S | 438 | 0.844 | P | 0.007 | D | 0.578 | 0.301 | Damaging | 0.8  | 54.6  | Korea1K       |                        |
| 63482660 | G | A | rs757908100  | G | D | 438 | 0.927 | D | 0.036 | D | 0.301 | 0.229 |          | 0.8  | 1.7   | ExAC          |                        |
| 63482665 | C | G | rs199697957  | L | V | 440 | 0.364 | B | 0.032 | D | 0.754 | 0.270 |          | 11.9 | 654.0 | Vietn/amese   |                        |
| 63482666 | T | A | rs748465912  | L | Q | 440 | 0.991 | D | 0.001 | D | 0.934 | 0.679 | Damaging | 0.8  | 1.1   | TOPMED        |                        |
| 63482668 | G | A | rs770430455  | D | N | 441 | 0.045 | B | 0.120 | T | 0.150 | 0.071 | Benign   | 0.8  | 0.8   | ExAC          |                        |
| 63482669 | A | C | rs1599141508 | D | A | 441 | 0.339 | B | 0.020 | D | 0.389 | 0.194 | Benign   | n/a  | 54.6  | Korea1K       |                        |

Table S1

|          |   |   |              |   |   |     |       |   |       |   |       |       |          |       |        |               |                        |
|----------|---|---|--------------|---|---|-----|-------|---|-------|---|-------|-------|----------|-------|--------|---------------|------------------------|
| 63482671 | C | T | rs749779360  | R | C | 442 | 0.002 | B | 0.066 | T | 0.237 | 0.072 | Benign   | 2.0   | 34.2   | KOREAN        | Benign                 |
| 63482672 | G | A | rs35865660   | R | H | 442 | 0.001 | B | 0.166 | T | 0.060 | 0.024 | Benign   | 131.8 | 755.0  | PAGE_STUDY    |                        |
| 63482680 | A | G | rs776411660  | N | D | 445 | 0.012 | B | 0.984 | T | 0.151 | 0.026 | Benign   | 0.4   | 0.8    | ExAC          |                        |
| 63482682 | T | A | rs2037090472 | N | K | 445 | 0.143 | B | 0.200 | T | 0.297 | 0.029 | Benign   | n/a   | 0.4    | TOPMED        |                        |
| 63482683 | G | A | rs2049730943 | D | N | 446 | 0.170 | B | 0.154 | T | 0.475 | 0.157 | Benign   | n/a   | 0.7    | GnomAD        |                        |
| 63482686 | A | G | rs761659396  | T | A | 447 | 0.004 | B | 0.775 | T | 0.108 | 0.026 | Benign   | 1.2   | 1.5    | TOPMED        |                        |
| 63482687 | C | T | rs746314800  | T | M | 447 | 0.046 | B | 0.132 | T | 0.141 | 0.022 | Benign   | 4.8   | 25.9   | ALSPAC        |                        |
| 63483031 | A | G | rs2049737716 | S | G | 449 | 0.104 | B | 0.100 | T | 0.539 | 0.140 | Benign   | n/a   | 0.4    | TOPMED        |                        |
| 63483032 | G | C | rs373076770  | S | T | 449 | 0.059 | B | 0.412 | T | 0.310 | 0.018 | Benign   | n/a   | 7.7    | GoESP         |                        |
| 63483034 | G | A | rs185115105  | D | N | 450 | 0.310 | B | 0.131 | T | 0.398 | 0.135 | Benign   | 0.8   | 20.0   | 1000Genomes   |                        |
| 63483037 | A | G | rs1401663578 | I | V | 451 | 0.305 | B | 0.056 | T | 0.510 | 0.218 | Benign   | n/a   | 1.4    | GnomAD        |                        |
| 63483038 | T | C | rs1158360384 | I | T | 451 | 0.820 | P | 0.040 | D | 0.509 | 0.200 | Damaging | 0.4   | 3.8    | TOPMED        |                        |
| 63483047 | T | A | rs1404415405 | L | X | 454 |       |   | n/a   |   | 0.990 | n/a   |          | n/a   | 0.8    | TOPMED        |                        |
| 63483052 | A | C | rs2049738166 | K | Q | 456 | 0.121 | B | 0.050 | T | 0.690 | 0.203 | Benign   | n/a   | 6.0    | TOMMO         |                        |
| 63483059 | C | T | rs1388880245 | A | V | 458 | 0.963 | D | 0.002 | D | 0.884 | 0.530 | Damaging | 0.4   | 0.4    | GnomAD_exomes |                        |
| 63483070 | A | T | rs1370566904 | I | F | 462 | 0.861 | P | 0.002 | D | 0.868 | 0.362 | Damaging | n/a   | 7.1    | dbGaP_PopFreq |                        |
| 63483071 | T | A | rs1289633744 | I | N | 462 | 1.000 | D | 0.000 | D | 0.965 | 0.644 | Damaging | 0.4   | 0.4    | GnomAD_exomes |                        |
| 63483076 | T | A | rs2049738685 | F | I | 464 | 0.869 | P | 0.004 | D | 0.907 | 0.698 | Damaging | n/a   | 0.4    | TOPMED        |                        |
| 63483088 | G | T | rs1170017440 | G | C | 468 | 0.996 | D | 0.002 | D | 0.920 | 0.589 | Damaging | n/a   | 1.4    | GnomAD        |                        |
| 63483097 | G | A | rs768818130  | V | M | 471 | 0.323 | B | 0.510 | T | 0.503 | 0.172 | Benign   | 0.8   | 1.7    | ExAC          |                        |
| 63483106 | T | C | rs772897915  | W | R | 474 | 0.999 | D | 0.000 | D | 0.960 | 0.817 | Damaging | 0.4   | 6.0    | TOMMO         |                        |
| 63483107 | G | A | rs762742726  | W | X | 474 |       |   | n/a   |   | 0.874 | n/a   |          | 0.8   | 0.8    | ExAC          |                        |
| 63483109 | C | T | rs770628079  | R | C | 475 | 1.000 | D | 0.000 | D | 0.985 | 0.630 | Damaging | 1.6   | 5.6    | dbGaP_PopFreq |                        |
| 63483110 | G | A | rs774394975  | R | H | 475 | 1.000 | D | 0.000 | D | 0.985 | 0.621 | Damaging | 2.0   | 8.7    | dbGaP_PopFreq |                        |
| 63483116 | G | A | rs986987823  | G | E | 477 | 0.279 | B | 0.691 | T | 0.406 | 0.080 | Benign   | 0.8   | 1.1    | TOPMED        |                        |
| 63483119 | T | G | rs1599141944 | V | G | 478 | 0.999 | D | 0.000 | D | 0.621 | 0.615 | Damaging | n/a   | 1090.0 | Korea1K       |                        |
| 63483121 | T | G | rs760413658  | F | V | 479 | 0.999 | D | 0.001 | D | 0.897 | 0.747 | Damaging | 0.4   | 54.6   | Korea1K       |                        |
| 63483125 | G | A | rs886053220  | S | N | 480 | 0.055 | B | 0.122 | T | 0.303 | 0.099 | Benign   | n/a   | 0.4    | TOPMED        |                        |
| 63483130 | C | T | rs201540553  | R | C | 482 | 0.649 | P | 0.022 | D | 0.408 | 0.100 | Benign   | 19.1  | 100.0  | GoNL          | Uncertain_significance |
| 63483131 | G | A | rs757694144  | R | H | 482 | 0.006 | B | 0.194 | T | 0.282 | 0.035 | Benign   | 4.4   | 6.0    | TOMMO         |                        |
| 63483133 | A | C | rs1568038525 | T | P | 483 | 0.388 | B | 0.041 | D | 0.492 | 0.324 | Benign   | 1.2   | 600.0  | Korea1K       |                        |
| 63483134 | C | T | rs2049740100 | T | I | 483 | 0.833 | P | 0.800 | T | 0.504 | 0.201 | Benign   | n/a   | 0.4    | TOPMED        |                        |
| 63483137 | C | G | rs1365864797 | P | R | 484 | 0.615 | P | 0.134 | T | 0.682 | 0.214 | Benign   | n/a   | 0.4    | TOPMED        |                        |
| 63483139 | C | G | rs202178737  | P | A | 485 | 0.059 | B | 0.061 | T | 0.555 | 0.100 | Benign   | 9.1   | 44.6   | Estonian      |                        |
| 63483140 | C | G | rs28730839   | P | R | 485 | 0.301 | B | 0.040 | D | 0.708 | 0.190 |          | 48.1  | 375.0  | MGP           |                        |
| 63483143 | C | T | rs748305912  | S | F | 486 | 0.923 | D | 0.008 | D | 0.496 | 0.111 |          | 0.4   | 0.8    | ExAC          |                        |
| 63483145 | C | T | rs149784122  | R | C | 487 | 0.972 | D | 0.028 | D | 0.642 | 0.107 | Damaging | 25.1  | 91.1   | PRJEB37766    |                        |
| 63483146 | G | A | rs376430907  | R | H | 487 | 0.235 | B | 0.065 | T | 0.305 | 0.083 | Benign   | 7.2   | 10.6   | TOPMED        | Likely_benign          |
| 63483149 | A | C | rs948392443  | Y | S | 488 | 0.999 | D | 0.011 | D | 0.880 | 0.780 | Damaging | n/a   | 2.1    | GnomAD        |                        |
| 63483151 | A | C | rs745820101  | N | H | 489 | 0.999 | D | 0.047 | D | 0.935 | 0.673 | Damaging | n/a   | 54.6   | Korea1K       |                        |
| 63483153 | C | G | rs145755731  | N | K | 489 | 1.000 | D | 0.020 | D | 0.935 | 0.435 | Damaging | 0.8   | 7.7    | GoESP         |                        |



Table S1

|          |   |   |                     |   |   |     |              |          |              |          |              |              |                 |             |              |                |                        |
|----------|---|---|---------------------|---|---|-----|--------------|----------|--------------|----------|--------------|--------------|-----------------|-------------|--------------|----------------|------------------------|
| 63483157 | G | A | rs371335496         | D | N | 491 | 0.152        | B        | 0.419        | T        | <b>0.603</b> | 0.085        | Benign          | 0.4         | 7.7          | GoESP          |                        |
| 63483159 | C | G | rs1254289491        | D | E | 491 | 0.054        | B        | 0.714        | T        | 0.358        | 0.052        | Benign          | n/a         | 0.7          | GnomAD         |                        |
| 63483161 | G | A | <b>rs1446625916</b> | W | X | 492 |              |          | n/a          |          | <b>0.874</b> | n/a          |                 | 0.8         | 5.6          | dbGaP_PopFreq  |                        |
| 63483163 | T | C | rs2049741339        | W | R | 493 | <b>0.999</b> | <b>D</b> | <b>0.004</b> | <b>D</b> | <b>0.920</b> | <b>0.781</b> | <b>Damaging</b> | n/a         | 0.4          | TOPMED         |                        |
| 63483165 | G | T | rs1182135727        | W | C | 493 | <b>0.992</b> | <b>D</b> | <b>0.003</b> | <b>D</b> | <b>0.902</b> | <b>0.691</b> | <b>Damaging</b> | 0.4         | 0.4          | GnomAD_exomes  |                        |
| 63483166 | T | G | rs760325775         | Y | D | 494 | 0.011        | B        | 0.630        | T        | <b>0.594</b> | 0.191        | Benign          | 2.4         | <b>54.6</b>  | Korea1K        |                        |
| 63483169 | C | T | rs374169715         | L | F | 495 | <b>0.974</b> | <b>D</b> | <b>0.024</b> | <b>D</b> | <b>0.624</b> | 0.372        | <b>Damaging</b> | 0.4         | 7.7          | GoESP          |                        |
| 63483461 | A | G | rs766717973         | T | A | 497 | 0.382        | B        | 0.754        | T        | 0.498        | 0.108        | Benign          | 0.4         | 0.8          | ExAC           |                        |
| 63483465 | A | G | rs752110462         | K | R | 498 | 0.217        | B        | 0.074        | T        | 0.392        | 0.119        | Benign          | 2.4         | <b>11.9</b>  | TOMMO          |                        |
| 63483468 | A | G | rs779110765         | Y | C | 499 | <b>0.999</b> | <b>D</b> | <b>0.003</b> | <b>D</b> | <b>0.937</b> | <b>0.801</b> | <b>Damaging</b> | 2.8         | <b>25.9</b>  | ALSPAC         |                        |
| 63483470 | C | T | <b>rs2049747561</b> | Q | X | 500 |              |          | n/a          |          | <b>0.944</b> | n/a          |                 | n/a         | 0.7          | GnomAD         |                        |
| 63483471 | A | G | rs1330033201        | Q | R | 500 | <b>0.956</b> | <b>D</b> | <b>0.007</b> | <b>D</b> | <b>0.854</b> | <b>0.664</b> | <b>Damaging</b> | 0.4         | 0.8          | TOPMED         |                        |
| 63483473 | G | A | rs886053221         | G | R | 501 | <b>1.000</b> | <b>D</b> | <b>0.003</b> | <b>D</b> | <b>0.793</b> | <b>0.587</b> | <b>Damaging</b> | n/a         | 4.7          | dbGaP_PopFreq  | Uncertain_significance |
| 63483474 | G | A | rs767656727         | G | E | 501 | <b>1.000</b> | <b>D</b> | <b>0.002</b> | <b>D</b> | <b>0.841</b> | <b>0.556</b> | <b>Damaging</b> | 0.4         | 0.8          | ExAC           |                        |
| 63483479 | T | A | rs1485835785        | C | S | 503 | 0.133        | B        | 0.417        | T        | <b>0.768</b> | 0.336        | Benign          | 0.4         | 0.4          | GnomAD_exomes  |                        |
| 63483482 | C | T | rs778204413         | P | S | 504 | <b>0.912</b> | <b>D</b> | <b>0.013</b> | <b>D</b> | 0.269        | 0.253        |                 | 1.6         | 1.6          | GnomAD_exomes  | Uncertain_significance |
| 63483483 | C | T | rs557514021         | P | L | 504 | <b>1.000</b> | <b>D</b> | <b>0.003</b> | <b>D</b> | <b>0.556</b> | 0.427        | <b>Damaging</b> | 0.8         | <b>20.0</b>  | 1000Genomes    |                        |
| 63483485 | C | G | rs148943954         | P | A | 505 | <b>0.939</b> | <b>D</b> | <b>0.015</b> | <b>D</b> | <b>0.571</b> | 0.359        | <b>Damaging</b> | <b>59.3</b> | <b>183.0</b> | PRJEB37766     | Uncertain_significance |
| 63483488 | G | A | rs747001287         | V | I | 506 | <b>0.480</b> | <b>P</b> | 0.272        | T        | 0.092        | 0.046        | Benign          | 0.8         | 0.8          | ExAC           |                        |
| 63483491 | A | G | rs1385293426        | T | A | 507 | 0.001        | B        | 0.783        | T        | 0.060        | 0.012        | Benign          | n/a         | 0.7          | GnomAD         |                        |
| 63483492 | C | G | rs1225189746        | T | S | 507 | 0.004        | B        | 0.765        | T        | 0.095        | 0.007        | Benign          | n/a         | 0.7          | GnomAD         |                        |
| 63483495 | G | A | rs746397573         | R | Q | 508 | <b>0.999</b> | <b>D</b> | <b>0.004</b> | <b>D</b> | <b>0.775</b> | <b>0.500</b> | <b>Damaging</b> | 2.0         | <b>51.9</b>  | ALSPAC         | Uncertain_significance |
| 63483497 | A | G | rs769290119         | N | D | 509 | 0.071        | B        | 0.572        | T        | 0.401        | 0.100        | Benign          | 0.4         | 0.8          | ExAC           |                        |
| 63483500 | G | A | rs371544905         | E | K | 510 | <b>0.847</b> | <b>P</b> | <b>0.007</b> | <b>D</b> | <b>0.644</b> | <b>0.524</b> | <b>Damaging</b> | 2.4         | <b>34.2</b>  | KOREAN         |                        |
| 63483503 | A | G | rs762574298         | T | A | 511 | 0.027        | B        | 0.719        | T        | 0.130        | 0.029        | Benign          | 1.6         | 1.6          | GnomAD_exomes  |                        |
| 63483512 | G | A | rs201762720         | D | N | 514 | <b>1.000</b> | <b>D</b> | <b>0.002</b> | <b>D</b> | <b>0.835</b> | 0.466        | <b>Damaging</b> | 4.4         | <b>34.2</b>  | KOREAN         | Uncertain_significance |
| 63483515 | G | T | rs144294634         | A | S | 515 | <b>0.978</b> | <b>D</b> | <b>0.013</b> | <b>D</b> | 0.381        | 0.242        |                 | <b>30.2</b> | <b>167.0</b> | NorthernSweden |                        |
| 63483530 | C | A | rs767844081         | H | N | 520 | <b>0.983</b> | <b>D</b> | <b>0.000</b> | <b>D</b> | <b>0.941</b> | <b>0.503</b> | <b>Damaging</b> | 2.8         | 4.1          | ExAC           |                        |
| 63483531 | A | G | rs1222739179        | H | R | 520 | <b>0.963</b> | <b>D</b> | <b>0.000</b> | <b>D</b> | <b>0.961</b> | <b>0.714</b> | <b>Damaging</b> | 0.4         | 0.7          | GnomAD         |                        |
| 63483533 | G | A | rs2049749257        | V | I | 521 | 0.072        | B        | 1.000        | T        | 0.091        | 0.039        | Benign          | n/a         | 6.0          | TOMMO          |                        |
| 63483537 | C | T | rs2049749316        | P | L | 522 | <b>0.994</b> | <b>D</b> | <b>0.004</b> | <b>D</b> | <b>0.889</b> | <b>0.534</b> | <b>Damaging</b> | n/a         | 6.0          | TOMMO          |                        |
| 63483539 | A | C | rs1053930450        | N | H | 523 | <b>0.705</b> | <b>P</b> | 0.056        | T        | 0.217        | 0.171        | Benign          | n/a         | 0.8          | TOPMED         |                        |
| 63483540 | A | G | rs1195088899        | N | S | 523 | 0.121        | B        | 0.403        | T        | 0.117        | 0.007        | Benign          | n/a         | 0.7          | GnomAD         |                        |
| 63483542 | G | A | rs1198635867        | V | M | 524 | <b>0.836</b> | <b>P</b> | <b>0.006</b> | <b>D</b> | 0.193        | 0.101        | Benign          | n/a         | 1.4          | GnomAD         |                        |
| 63483543 | T | C | rs12720746          | V | A | 524 | 0.150        | B        | 0.085        | T        | 0.174        | 0.035        | Benign          | 4.0         | <b>10.4</b>  | dbGaP_PopFreq  |                        |
| 63483545 | A | G | rs764244232         | T | A | 525 | 0.090        | B        | 0.238        | T        | <b>0.572</b> | 0.141        | Benign          | 0.4         | 0.8          | ExAC           |                        |
| 63483546 | C | T | rs1251832995        | T | I | 525 | <b>0.485</b> | <b>P</b> | 0.142        | T        | <b>0.692</b> | 0.151        | Benign          | 0.4         | 0.4          | GnomAD_exomes  |                        |
| 63483548 | C | A | rs754150700         | P | T | 526 | <b>0.997</b> | <b>D</b> | <b>0.007</b> | <b>D</b> | <b>0.901</b> | <b>0.573</b> | <b>Damaging</b> | n/a         | <b>34.3</b>  | KOREAN         |                        |
| 63483552 | A | G | rs376323371         | Y | C | 527 | <b>0.997</b> | <b>D</b> | <b>0.000</b> | <b>D</b> | <b>0.952</b> | <b>0.702</b> | <b>Damaging</b> | 2.0         | 8.6          | GnomAD         |                        |
| 63483556 | C | G | rs2029861083        | I | M | 528 | <b>0.898</b> | <b>P</b> | <b>0.037</b> | <b>D</b> | <b>0.854</b> | 0.247        | <b>Damaging</b> | n/a         | 0.4          | TOPMED         |                        |
| 63483849 | G | C | rs368074905         | R | S | 529 | <b>0.918</b> | <b>D</b> | <b>0.004</b> | <b>D</b> | <b>0.882</b> | 0.474        | <b>Damaging</b> | n/a         | 7.7          | GoESP          |                        |

Table S1

|          |   |   |              |   |   |     |       |   |       |   |       |       |          |      |       |               |                        |
|----------|---|---|--------------|---|---|-----|-------|---|-------|---|-------|-------|----------|------|-------|---------------|------------------------|
| 63483850 | T | C | rs2029861365 | Y | H | 530 | 0.942 | D | 0.000 | D | 0.978 | 0.772 | Damaging | n/a  | 0.4   | TOPMED        |                        |
| 63483851 | A | G | rs745506888  | Y | C | 530 | 0.999 | D | 0.000 | D | 0.956 | 0.844 | Damaging | 1.2  | 1.7   | ExAC          |                        |
| 63483854 | T | G | rs551801825  | F | C | 531 | 1.000 | D | 0.000 | D | 0.924 | 0.575 | Damaging | 0.4  | 20.0  | 1000Genomes   |                        |
| 63483856 | G | T | rs2029861375 | V | L | 532 | 0.456 | P | 0.267 | T | 0.759 | 0.260 | Benign   | n/a  | 0.7   | GnomAD        |                        |
| 63483864 | T | G | rs1390757637 | F | L | 534 | 0.274 | B | 0.094 | T | 0.871 | 0.355 | Benign   | n/a  | 0.7   | GnomAD        |                        |
| 63483865 | G | A | rs1190471425 | V | I | 535 | 0.097 | B | 1.000 | T | 0.130 | 0.063 | Benign   | n/a  | 2.1   | GnomAD        |                        |
| 63483871 | C | T | rs1460738029 | Q | X | 537 |       |   | n/a   |   | 0.889 | n/a   |          | 0.4  | 0.4   | GnomAD_exomes |                        |
| 63483872 | A | G | rs762937072  | Q | R | 537 | 0.919 | D | 0.001 | D | 0.649 | 0.619 | Damaging | 2.4  | 25.9  | ALSPAC        |                        |
| 63483873 | G | T | rs868856670  | Q | H | 537 | 0.995 | D | 0.001 | D | 0.878 | 0.542 | Damaging | n/a  | 0.7   | GnomAD        |                        |
| 63483876 | C | G | rs769230286  | F | L | 538 | 0.963 | D | 0.000 | D | 0.822 | 0.465 | Damaging | 0.4  | 0.8   | ExAC          |                        |
| 63483877 | C | A | rs1474365321 | Q | K | 539 | 1.000 | D | 0.000 | D | 0.942 | 0.614 | Damaging | n/a  | 0.8   | TOPMED        |                        |
| 63483884 | A | G | rs776858777  | H | R | 541 | 0.998 | D | 0.008 | D | 0.887 | 0.692 | Damaging | 0.4  | 0.8   | ExAC          |                        |
| 63483887 | A | G | rs1453609198 | E | G | 542 | 0.665 | P | 0.020 | D | 0.275 | 0.349 | Benign   | n/a  | 0.7   | GnomAD        |                        |
| 63483889 | G | T | rs762055246  | A | S | 543 | 0.547 | P | 0.381 | T | 0.464 | 0.228 | Benign   | 0.4  | 2.3   | TOPMED        |                        |
| 63483890 | C | T | rs765347178  | A | V | 543 | 0.751 | P | 0.005 | D | 0.204 | 0.294 | Benign   | 0.4  | 0.8   | TOPMED        |                        |
| 63483901 | G | T | rs1319345885 | E | X | 547 |       |   | n/a   |   | 0.879 | n/a   |          | 0.4  | 0.4   | GnomAD_exomes |                        |
| 63483908 | G | A | rs1328713530 | G | D | 549 | 0.965 | D | 0.099 | T | 0.232 | 0.168 | Benign   | 0.4  | 0.8   | TOPMED        |                        |
| 63483911 | A | G | rs753761783  | Y | C | 550 | 0.751 | P | 0.008 | D | 0.391 | 0.235 | Benign   | 1.2  | 1.7   | ExAC          |                        |
| 63483916 | G | A | rs1339063327 | G | S | 552 | 0.678 | P | 0.044 | D | 0.403 | 0.411 | Benign   | n/a  | 0.7   | GnomAD        |                        |
| 63483917 | G | A | rs145152527  | G | D | 552 | 0.245 | B | 0.052 | T | 0.683 | 0.412 | Benign   | 2.4  | 39.9  | 1000Genomes   | Uncertain_significance |
| 63483923 | T | C | rs2029861451 | L | P | 554 | 0.992 | D | 0.000 | D | 0.945 | 0.763 | Damaging | n/a  | 0.8   | TOPMED        |                        |
| 63483925 | C | T | rs778451287  | H | Y | 555 | 0.721 | P | 0.144 | T | 0.564 | 0.246 | Benign   | 1.2  | 1.7   | ExAC          |                        |
| 63483931 | T | C | rs1012505443 | C | R | 557 | 1.000 | D | 0.000 | D | 0.863 | 0.695 | Damaging | n/a  | 2.8   | dbGaP_PopFreq |                        |
| 63483934 | G | A | rs2029861470 | D | N | 558 | 0.878 | P | 0.010 | D | 0.816 | 0.409 | Damaging | n/a  | 0.4   | TOPMED        |                        |
| 63483937 | A | G | rs1205538057 | I | V | 559 | 0.224 | B | 0.010 | D | 0.597 | 0.294 |          | 0.4  | 0.4   | GnomAD_exomes |                        |
| 63483938 | T | C | rs2029861475 | I | T | 559 | 0.984 | D | 0.002 | D | 0.894 | 0.687 | Damaging | n/a  | 6.0   | TOMMO         |                        |
| 63483941 | A | G | rs745536540  | Y | C | 560 | 0.996 | D | 0.004 | D | 0.914 | 0.618 | Damaging | 0.4  | 0.8   | ExAC          |                        |
| 63483943 | C | T | rs4314       | R | W | 561 | 0.783 | P | 0.012 | D | 0.371 | 0.103 | Benign   | 77.8 | 369.0 | GoESP         | Benign                 |
| 63483944 | G | T | rs780299861  | R | L | 561 | 0.082 | B | 0.081 | T | 0.336 | 0.135 | Benign   | n/a  | 5.7   | dbGaP_PopFreq |                        |
| 63483946 | T | C | rs1599142834 | S | P | 562 | 0.993 | D | 0.002 | D | 0.904 | 0.678 | Damaging | n/a  | 0.4   | TOPMED        |                        |
| 63483949 | A | C | rs747313119  | T | P | 563 | 0.047 | B | 0.123 | T | 0.218 | 0.080 | Benign   | 0.4  | 0.9   | ExAC          |                        |
| 63483950 | C | T | rs769142434  | T | I | 563 | 0.179 | B | 0.084 | T | 0.246 | 0.094 | Benign   | 2.0  | 16.2  | TOPMED        | Uncertain_significance |
| 63483952 | A | G | rs1171059871 | K | E | 564 | 0.002 | B | 1.000 | T | 0.047 | 0.102 | Benign   | n/a  | 3.1   | dbGaP_PopFreq |                        |
| 63483953 | A | C | rs1599142842 | K | T | 564 | 0.025 | B | 0.037 | D | 0.289 | 0.060 | Benign   | n/a  | 34.2  | KOREAN        |                        |
| 63483955 | G | A | rs777339023  | A | T | 565 | 0.976 | D | 0.000 | D | 0.856 | 0.536 | Damaging | 4.8  | 6.8   | dbGaP_PopFreq |                        |
| 63483956 | C | T | rs2029861504 | A | V | 565 | 0.945 | D | 0.000 | D | 0.822 | 0.514 | Damaging | n/a  | 0.4   | TOPMED        |                        |
| 63483958 | G | A | rs748643856  | G | R | 566 | 1.000 | D | 0.000 | D | 0.876 | 0.706 | Damaging | 0.8  | 14.2  | dbGaP_PopFreq |                        |
| 63483959 | G | A | rs769805183  | G | E | 566 | 1.000 | D | 0.000 | D | 0.847 | 0.703 | Damaging | 0.4  | 2.4   | TOPMED        |                        |
| 63483961 | G | A | rs1399318948 | A | T | 567 | 0.059 | B | 0.506 | T | 0.188 | 0.051 | Benign   | 0.4  | 0.4   | GnomAD_exomes |                        |
| 63483962 | C | T | rs1422455629 | A | V | 567 | 0.358 | B | 0.249 | T | 0.303 | 0.195 | Benign   | n/a  | 22.4  | dbGaP_PopFreq |                        |
| 63483967 | C | G | rs1318295451 | L | V | 569 | 0.952 | D | 0.000 | D | 0.519 | 0.416 | Damaging | 0.4  | 0.4   | GnomAD_exomes |                        |

Table S1

|          |   |   |              |   |   |     |       |   |       |   |       |       |          |       |        |               |                        |
|----------|---|---|--------------|---|---|-----|-------|---|-------|---|-------|-------|----------|-------|--------|---------------|------------------------|
| 63483968 | T | C | rs773305413  | L | P | 569 | 1.000 | D | 0.000 | D | 0.830 | 0.757 | Damaging | 0.4   | 0.9    | ExAC          |                        |
| 63483970 | C | T | rs567828872  | R | W | 570 | 0.983 | D | 0.014 | D | 0.313 | 0.166 |          | 15.3  | 109.0  | Korea1K       |                        |
| 63483971 | G | A | rs371599063  | R | Q | 570 | 0.137 | B | 0.608 | T | 0.218 | 0.027 | Benign   | 2.4   | 9.8    | dbGaP_PopFreq |                        |
| 63484332 | A | C | rs2029862390 | K | T | 571 | 0.040 | B | 0.543 | T | 0.202 | 0.082 | Benign   | n/a   | 0.7    | GnomAD        |                        |
| 63484333 | G | C | rs777717910  | K | N | 571 | 0.096 | B | 0.479 | T | 0.106 | 0.025 | Benign   | 0.8   | 3.6    | GnomAD        |                        |
| 63484338 | T | C | rs1365063879 | L | P | 573 | 0.999 | D | 0.001 | D | 0.900 | 0.642 | Damaging | n/a   | 0.8    | TOPMED        |                        |
| 63484340 | C | A | rs2029862424 | Q | K | 574 | 0.003 | B | 0.508 | T | 0.128 | 0.070 | Benign   | n/a   | 0.4    | TOPMED        |                        |
| 63484341 | A | T | rs2029862431 | Q | L | 574 | 0.046 | B | 0.046 | D | 0.421 | 0.138 | Benign   | n/a   | 0.7    | GnomAD        |                        |
| 63484347 | G | C | rs1243492273 | G | A | 576 | 0.989 | D | 0.000 | D | 0.833 | 0.835 | Damaging | 0.4   | 4.3    | dbGaP_PopFreq |                        |
| 63484349 | T | A | rs749450863  | S | T | 577 | 0.146 | B | 0.223 | T | 0.381 | 0.147 | Benign   | 0.4   | 5.1    | dbGaP_PopFreq |                        |
| 63484353 | C | T | rs2029862464 | S | F | 578 | 1.000 | D | 0.000 | D | 0.807 | 0.465 | Damaging | n/a   | 0.7    | GnomAD        |                        |
| 63484358 | C | A | rs759719543  | P | T | 580 | 0.119 | B | 0.007 | D | 0.478 | 0.258 | Benign   | 2.4   | 4.8    | ExAC          | Uncertain_significance |
| 63484359 | C | T | rs897870088  | P | L | 580 | 0.805 | P | 0.003 | D | 0.520 | 0.362 | Damaging | n/a   | 0.8    | TOPMED        |                        |
| 63484362 | G | A | rs768467806  | W | X | 581 |       |   | n/a   |   | 0.948 | n/a   |          | 0.4   | 1.0    | ExAC          |                        |
| 63484363 | G | T | rs1337718181 | W | C | 581 | 1.000 | D | 0.002 | D | 0.936 | 0.716 | Damaging | 0.4   | 54.6   | Korea1K       |                        |
| 63484369 | G | C | rs1198303493 | E | D | 583 | 0.001 | B | 0.729 | T | 0.147 | 0.046 | Benign   | 0.4   | 0.4    | GnomAD_exomes |                        |
| 63484370 | G | A | rs2029862514 | V | M | 584 | 0.985 | D | 0.009 | D | 0.461 | 0.315 |          | n/a   | 9.4    | dbGaP_PopFreq |                        |
| 63484371 | T | G | rs1599143230 | V | G | 584 | 0.973 | D | 0.090 | T | 0.533 | 0.461 |          | n/a   | 491.0  | Korea1K       |                        |
| 63484374 | T | C | rs776358299  | L | P | 585 | 0.998 | D | 0.001 | D | 0.952 | 0.729 | Damaging | 0.8   | 0.9    | ExAC          |                        |
| 63484376 | A | G | rs371414386  | K | E | 586 | 0.013 | B | 1.000 | T | 0.136 | 0.122 | Benign   | n/a   | 7.7    | GoESP         | Uncertain_significance |
| 63484377 | A | G | rs1489606366 | K | R | 586 | 0.009 | B | 0.253 | T | 0.094 | 0.071 | Benign   | n/a   | 0.4    | TOPMED        |                        |
| 63484379 | G | A | rs1182072433 | D | N | 587 | 0.001 | B | 0.492 | T | 0.072 | 0.064 | Benign   | 0.8   | 0.8    | GnomAD_exomes |                        |
| 63484382 | A | G | rs1429588559 | M | V | 588 | 0.020 | B | 0.412 | T | 0.063 | 0.026 | Benign   | 0.8   | 1.1    | TOPMED        |                        |
| 63484383 | T | C | rs1171932485 | M | T | 588 | 0.092 | B | 0.017 | D | 0.152 | 0.125 | Benign   | 0.4   | 0.4    | GnomAD_exomes |                        |
| 63484388 | G | A | rs762585402  | G | S | 590 | 0.898 | P | 0.029 | D | 0.800 | 0.480 | Damaging | 34.3  | 45.9   | PAGE_STUDY    | Likely_benign          |
| 63484389 | G | A | rs1176792351 | G | D | 590 | 0.882 | P | 0.022 | D | 0.891 | 0.583 | Damaging | 0.4   | 0.4    | GnomAD_exomes |                        |
| 63484394 | G | A | rs1450198005 | D | N | 592 | 0.022 | B | 0.503 | T | 0.140 | 0.096 | Benign   | 0.4   | 0.7    | GnomAD        |                        |
| 63484395 | A | G | rs12709426   | D | G | 592 | 0.047 | B | 0.300 | T | 0.168 | 0.076 | Benign   | 382.2 | 5910.0 | Chileans      | Benign/Likely_benign   |
| 63484401 | T | C | rs781708329  | L | P | 594 | 0.998 | D | 0.002 | D | 0.810 | 0.507 | Damaging | 0.4   | 1.5    | TOPMED        |                        |
| 63484403 | G | T | rs753055168  | D | Y | 595 | 0.992 | D | 0.003 | D | 0.805 | 0.328 | Damaging | 0.4   | 0.9    | ExAC          |                        |
| 63484406 | G | T | rs530248886  | A | S | 596 | 0.562 | P | 0.020 | D | 0.468 | 0.315 | Benign   | 0.8   | 20.0   | 1000Genomes   |                        |
| 63484407 | C | T | rs546796175  | A | V | 596 | 0.438 | B | 0.203 | T | 0.324 | 0.221 | Benign   | 1.6   | 20.0   | 1000Genomes   |                        |
| 63484409 | C | T | rs2029862662 | Q | X | 597 |       |   | n/a   |   | 0.875 | n/a   |          | n/a   | 0.4    | TOPMED        |                        |
| 63484412 | C | T | rs988156346  | P | S | 598 | 0.522 | P | 0.158 | T | 0.185 | 0.078 | Benign   | 0.4   | 2.8    | dbGaP_PopFreq |                        |
| 63484413 | C | T | rs759009903  | P | L | 598 | 0.997 | D | 0.046 | D | 0.412 | 0.321 |          | 1.6   | 25.9   | ALSPAC        |                        |
| 63484421 | A | G | rs1188841988 | K | E | 601 | 0.011 | B | 1.000 | T | 0.052 | 0.107 | Benign   | 0.4   | 0.4    | GnomAD_exomes |                        |
| 63484422 | A | G | rs776418026  | K | R | 601 | 0.037 | B | 0.016 | D | 0.155 | 0.043 | Benign   | 0.8   | 1.8    | ExAC          |                        |
| 63484427 | T | A | rs1178062715 | F | I | 603 | 0.999 | D | 0.002 | D | 0.840 | 0.741 | Damaging | n/a   | 0.4    | TOPMED        |                        |
| 63484440 | C | A | rs1477242406 | T | N | 607 | 0.085 | B | 0.312 | T | 0.266 | 0.023 | Benign   | 0.4   | 8.7    | dbGaP_PopFreq |                        |
| 63484443 | A | C | rs1427973166 | Q | P | 608 | 0.771 | P | 0.251 | T | 0.492 | 0.213 | Benign   | n/a   | 1.1    | TOPMED        |                        |
| 63484445 | T | A | rs1430977899 | W | R | 609 | 0.999 | D | 0.000 | D | 0.813 | 0.668 | Damaging | 0.4   | 0.4    | GnomAD_exomes |                        |

Table S1

|          |   |   |              |   |   |     |       |   |       |       |       |       |          |      |        |               |
|----------|---|---|--------------|---|---|-----|-------|---|-------|-------|-------|-------|----------|------|--------|---------------|
| 63484447 | G | A | rs769466912  | W | X | 609 |       |   | n/a   | 0.952 | n/a   | 0.4   | 0.9      | ExAC |        |               |
| 63484451 | C | G | rs1599143343 | Q | E | 611 | 0.228 | B | 0.970 | T     | 0.153 | 0.048 | Benign   | n/a  | 273.0  | Korea1K       |
| 63484455 | A | G | rs773255356  | E | G | 612 | 0.991 | D | 0.050 | T     | 0.427 | 0.206 | Benign   | n/a  | 437.0  | Korea1K       |
| 63484457 | C | T | rs935167896  | Q | X | 613 |       |   | n/a   | 0.966 | n/a   | n/a   |          | 3.0  | TOPMED |               |
| 63484461 | A | G | rs1568039509 | N | S | 614 | 0.837 | P | 0.007 | D     | 0.768 | 0.406 | Damaging | 0.4  | 0.4    | GnomAD_exomes |
| 63484466 | C | T | rs762769560  | Q | X | 616 |       |   | n/a   | 0.848 | n/a   |       | 0.4      | 0.9  | ExAC   |               |
| 63484469 | A | C | rs1455120932 | N | H | 617 | 0.209 | B | 0.062 | T     | 0.167 | 0.093 | Benign   | 0.4  | 0.4    | GnomAD_exomes |
| 63484470 | A | G | rs372497513  | N | S | 617 | 0.059 | B | 0.309 | T     | 0.130 | 0.068 | Benign   | 0.4  | 7.7    | GoESP         |
| 63484472 | G | A | rs111269527  | G | S | 618 | 0.435 | B | 0.058 | T     | 0.098 | 0.082 | Benign   | 2.5  | 23.1   | GoESP         |
| 63484475 | G | A | rs375452338  | E | K | 619 | 0.924 | D | 0.076 | T     | 0.795 | 0.241 |          | 1.6  | 15.4   | GoESP         |
| 63484476 | A | C | rs1221968598 | E | A | 619 | 0.696 | P | 0.116 | T     | 0.657 | 0.240 | Benign   | 0.4  | 4.7    | dbGaP_PopFreq |
| 63484491 | C | G | rs972271442  | P | R | 624 | 0.246 | B | 0.043 | D     | 0.910 | 0.474 |          | n/a  | 1.1    | TOPMED        |
| 63484493 | G | A | rs754396876  | E | K | 625 | 0.680 | P | 0.319 | T     | 0.590 | 0.242 | Benign   | 0.8  | 2.0    | ExAC          |
| 63484496 | T | G | rs757708886  | Y | D | 626 | 0.114 | B | 0.151 | T     | 0.389 | 0.117 | Benign   | 2.6  | 2.6    | GnomAD_exomes |
| 63484497 | A | C | rs778975417  | Y | S | 626 | 0.049 | B | 0.296 | T     | 0.385 | 0.103 | Benign   | n/a  | 4.1    | ExAC          |
| 63484500 | A | G | rs200963739  | Q | R | 627 | 0.167 | B | 0.326 | T     | 0.300 | 0.154 | Benign   | n/a  | 79.9   | 1000Genomes   |
| 63484503 | G | A | rs745879536  | W | X | 628 |       |   | n/a   | 0.938 | n/a   |       | 0.4      | 1.1  | ExAC   |               |
| 63484504 | G | C | rs758471657  | W | C | 628 | 0.994 | D | 0.007 | D     | 0.933 | 0.554 | Damaging | n/a  | 1.1    | ExAC          |
| 63484505 | C | T | rs2029862989 | H | Y | 629 | 0.043 | B | 1.000 | T     | 0.135 | 0.055 | Benign   | n/a  | 0.4    | TOPMED        |
| 63484506 | A | C | rs201594771  | H | P | 629 | 0.001 | B | 0.277 | T     | 0.251 | 0.114 | Benign   | n/a  | 994.0  | KOREAN        |
| 63484509 | C | T | rs142818229  | P | L | 630 | 0.988 | D | 0.003 | D     | 0.776 | 0.386 | Damaging | 4.1  | 34.2   | KOREAN        |
| 63484512 | C | T | rs749271989  | P | L | 631 | 0.018 | B | 0.282 | T     | 0.658 | 0.281 | Benign   | 3.3  | 5.0    | GnomAD        |
| 63484522 | C | A | rs2029863038 | D | E | 634 | 0.000 | B | 0.834 | T     | 0.042 | 0.084 | Benign   | n/a  | 6.0    | TOMMO         |
| 63484524 | A | G | rs774004648  | N | S | 635 | 0.046 | B | 0.795 | T     | 0.118 | 0.125 | Benign   | 1.2  | 41.8   | TOMMO         |
| 63484529 | C | A | rs759173310  | P | T | 637 | 0.998 | D | 0.218 | T     | 0.777 | 0.216 |          | 0.4  | 1.0    | ExAC          |
| 63484530 | C | T | rs767112824  | P | L | 637 | 0.999 | D | 0.054 | T     | 0.853 | 0.269 |          | 4.5  | 4.5    | GnomAD_exomes |
| 63484532 | G | A | rs760201372  | E | K | 638 | 0.125 | B | 0.213 | T     | 0.311 | 0.198 | Benign   | 9.8  | 12.8   | TOPMED        |
| 63484535 | G | A | rs72845024   | G | S | 639 | 0.007 | B | 0.293 | T     | 0.117 | 0.038 | Benign   | 6.1  | 20.0   | 1000Genomes   |
| 63484536 | G | T | rs754090770  | G | V | 639 | 0.410 | B | 0.037 | D     | 0.365 | 0.119 | Benign   | 2.1  | 171.0  | KOREAN        |
| 63484539 | T | G | rs1307478617 | I | R | 640 | 0.724 | P | 0.088 | T     | 0.622 | 0.194 | Benign   | 0.4  | 0.4    | GnomAD_exomes |
| 63485236 | A | T | rs759386648  | D | V | 641 | 0.012 | B | 0.051 | T     | 0.291 | 0.118 | Benign   | 0.4  | 7.1    | dbGaP_PopFreq |
| 63485238 | C | G | rs2029871862 | L | V | 642 | 0.396 | B | 0.504 | T     | 0.213 | 0.070 | Benign   | n/a  | 0.7    | GnomAD        |
| 63485241 | G | A | rs767279985  | V | M | 643 | 0.449 | P | 0.099 | T     | 0.231 | 0.073 | Benign   | n/a  | 0.7    | GnomAD        |
| 63485242 | T | C | rs1317871269 | V | A | 643 | 0.098 | B | 0.876 | T     | 0.278 | 0.039 | Benign   | 0.4  | 9.4    | dbGaP_PopFreq |
| 63485245 | C | G | rs752660066  | T | S | 644 | 0.001 | B | 0.495 | T     | 0.099 | 0.028 | Benign   | 1.6  | 54.6   | Korea1K       |
| 63485247 | G | A | rs763603427  | D | N | 645 | 0.995 | D | 0.246 | T     | 0.393 | 0.124 | Benign   | 0.4  | 1.4    | GnomAD        |
| 63485248 | A | C | rs1281544974 | D | A | 645 | 0.995 | D | 0.081 | T     | 0.635 | 0.463 |          | n/a  | 1.1    | TOPMED        |
| 63485260 | C | T | rs2029872327 | A | V | 649 | 0.998 | D | 0.063 | T     | 0.807 | 0.329 |          | n/a  | 0.7    | GnomAD        |
| 63485269 | T | A | rs1393713094 | F | Y | 652 | 0.892 | P | 0.203 | T     | 0.398 | 0.210 | Benign   | n/a  | 0.7    | GnomAD        |
| 63485271 | G | A | rs1248095456 | V | M | 653 | 0.058 | B | 0.138 | T     | 0.527 | 0.031 | Benign   | n/a  | 4.7    | dbGaP_PopFreq |
| 63485274 | G | A | rs2029872533 | E | K | 654 | 0.565 | P | 0.355 | T     | 0.486 | 0.185 | Benign   | n/a  | 0.4    | TOPMED        |

Uncertain\_significance

Table S1

|          |   |   |              |   |   |     |       |   |       |   |       |       |          |      |       |               |                        |
|----------|---|---|--------------|---|---|-----|-------|---|-------|---|-------|-------|----------|------|-------|---------------|------------------------|
| 63485277 | G | A | rs1371611657 | E | K | 655 | 0.824 | P | 0.416 | T | 0.531 | 0.143 | Benign   | n/a  | 2.8   | dbGaP_PopFreq |                        |
| 63485279 | A | C | rs1487276305 | E | D | 655 | 0.539 | P | 0.390 | T | 0.330 | 0.103 | Benign   | 0.4  | 5.1   | dbGaP_PopFreq |                        |
| 63485280 | T | C | rs2029872680 | Y | H | 656 | 0.994 | D | 0.047 | D | 0.572 | 0.349 | Damaging | n/a  | 6.0   | TOMMO         |                        |
| 63485286 | C | T | rs778684365  | R | W | 658 | 0.581 | P | 0.017 | D | 0.409 | 0.188 | Benign   | 0.8  | 7.1   | dbGaP_PopFreq |                        |
| 63485292 | T | G | rs2029873057 | S | A | 660 | 0.000 | B | 1.000 | T | 0.101 | 0.070 | Benign   | n/a  | 9.4   | dbGaP_PopFreq |                        |
| 63485293 | C | G | rs147429960  | S | C | 660 | 0.242 | B | 0.073 | T | 0.409 | 0.142 | Benign   | 92.7 | 401.0 | GoNL          | Uncertain_significance |
| 63485296 | A | T | rs1406304639 | Q | L | 661 | 0.001 | B | 0.266 | T | 0.221 | 0.078 | Benign   | n/a  | 0.4   | TOPMED        |                        |
| 63485297 | G | C | rs2029873234 | Q | H | 661 | 0.004 | B | 0.060 | T | 0.364 | 0.134 | Benign   | n/a  | 0.4   | TOPMED        |                        |
| 63485299 | T | G | rs1379553980 | V | G | 662 | 0.002 | B | 0.435 | T | 0.283 | 0.064 | Benign   | 0.4  | 0.4   | GnomAD_exomes |                        |
| 63485301 | G | C | rs1178170347 | V | L | 663 | 0.002 | B | 0.470 | T | 0.212 | 0.034 | Benign   | n/a  | 0.4   | TOPMED        |                        |
| 63485306 | G | A | rs1419177611 | W | X | 664 |       |   | n/a   |   | 0.958 | n/a   |          | 0.4  | 0.4   | GnomAD_exomes |                        |
| 63485310 | G | A | rs201804955  | E | K | 666 | 0.313 | B | 0.763 | T | 0.421 | 0.137 | Benign   | 33.4 | 121.0 | PRJEB37766    |                        |
| 63485312 | G | C | rs2029873572 | E | D | 666 | 0.160 | B | 0.583 | T | 0.168 | 0.068 | Benign   | n/a  | 0.7   | GnomAD        |                        |
| 63485314 | A | G | rs1434646780 | Y | C | 667 | 0.938 | D | 0.135 | T | 0.738 | 0.318 |          | 0.4  | 0.4   | GnomAD_exomes |                        |
| 63485319 | G | A | rs769228405  | E | K | 669 | 0.813 | P | 0.649 | T | 0.849 | 0.253 | Benign   | 18.7 | 171.0 | KOREAN        |                        |
| 63485320 | A | G | rs1266247312 | E | G | 669 | 0.921 | D | 0.430 | T | 0.722 | 0.261 |          | n/a  | 0.7   | GnomAD        |                        |
| 63485323 | C | A | rs1177823963 | A | D | 670 | 0.075 | B | 0.002 | D | 0.914 | 0.503 | Damaging | n/a  | 0.4   | TOPMED        |                        |
| 63485326 | A | C | rs538715770  | N | T | 671 | 0.121 | B | 0.294 | T | 0.416 | 0.028 | Benign   | 0.4  | 20.0  | 1000Genomes   |                        |
| 63485333 | C | G | rs564928656  | N | K | 673 | 0.005 | B | 0.439 | T | 0.112 | 0.032 | Benign   | 0.4  | 100.0 | GoNL          |                        |
| 63485337 | A | C | rs1245129210 | N | H | 675 | 0.076 | B | 0.119 | T | 0.511 | 0.182 | Benign   | n/a  | 0.4   | TOPMED        |                        |
| 63485346 | A | G | rs371131106  | I | V | 678 | 0.628 | P | 0.234 | T | 0.468 | 0.173 | Benign   | 8.4  | 16.4  | GnomAD        |                        |
| 63485349 | A | G | rs771872424  | T | A | 679 | 0.023 | B | 0.009 | D | 0.332 | 0.244 | Benign   | 0.8  | 22.3  | dbGaP_PopFreq |                        |
| 63485350 | C | T | rs532375661  | T | I | 679 | 0.635 | P | 0.003 | D | 0.410 | 0.206 | Benign   | n/a  | 100.0 | GoNL          |                        |
| 63485357 | G | C | rs764154741  | E | D | 681 | 0.002 | B | 0.328 | T | 0.132 | 0.027 | Benign   | 0.4  | 0.8   | ExAC          |                        |
| 63485359 | C | A | rs753705010  | T | N | 682 | 0.000 | B | 1.000 | T | 0.086 | 0.157 | Benign   | 0.8  | 1.5   | TOPMED        |                        |
| 63485366 | G | C | rs1453772021 | K | N | 684 | 0.003 | B | 0.363 | T | 0.172 | 0.079 | Benign   | n/a  | 0.7   | GnomAD        |                        |
| 63486569 | A | G | rs775191459  | M | V | 691 | 0.000 | B | 0.480 | T | 0.046 | 0.043 | Benign   | 0.4  | 11.9  | TOMMO         |                        |
| 63486572 | C | A | rs1260448350 | Q | K | 692 | 0.015 | B | 0.651 | T | 0.080 | 0.069 | Benign   | n/a  | 0.7   | GnomAD        |                        |
| 63486575 | A | G | rs2029953456 | I | V | 693 | 0.000 | B | 1.000 | T | 0.033 | 0.100 | Benign   | n/a  | 0.8   | TOPMED        |                        |
| 63486578 | G | A | rs764410917  | A | T | 694 | 0.327 | B | 0.108 | T | 0.095 | 0.063 | Benign   | 0.8  | 0.8   | ExAC          |                        |
| 63486582 | A | G | rs762256846  | N | S | 695 | 0.053 | B | 0.700 | T | 0.141 | 0.119 | Benign   | 0.8  | 1.4   | GnomAD        |                        |
| 63486584 | C | A | rs1187097777 | H | N | 696 | 0.688 | P | 0.218 | T | 0.651 | 0.210 | Benign   | n/a  | 0.4   | TOPMED        |                        |
| 63486585 | A | T | rs2029954191 | H | L | 696 | 0.269 | B | 0.427 | T | 0.721 | 0.196 | Benign   | n/a  | 4.7   | dbGaP_PopFreq |                        |
| 63486588 | C | A | rs765315607  | T | N | 697 | 0.928 | D | 0.423 | T | 0.677 | 0.143 |          | 4.0  | 8.7   | dbGaP_PopFreq |                        |
| 63486599 | G | A | rs1172339137 | G | S | 701 | 0.999 | D | 0.449 | T | 0.631 | 0.302 |          | 1.2  | 3.2   | TOPMED        |                        |
| 63486603 | C | A | rs2029955964 | T | N | 702 | 0.001 | B | 0.497 | T | 0.197 | 0.023 | Benign   | n/a  | 0.4   | TOPMED        |                        |
| 63486607 | G | C | rs751787326  | Q | H | 703 | 0.089 | B | 0.130 | T | 0.228 | 0.060 | Benign   | 0.8  | 2.6   | TOPMED        |                        |
| 63486609 | C | T | rs756018163  | A | V | 704 | 0.663 | P | 0.087 | T | 0.806 | 0.255 | Benign   | n/a  | 0.8   | ExAC          |                        |
| 63486611 | A | G | rs2029956646 | R | G | 705 | 0.006 | B | 0.091 | T | 0.429 | 0.128 | Benign   | n/a  | 3.1   | dbGaP_PopFreq |                        |
| 63486612 | G | A | rs2029956870 | R | K | 705 | 0.003 | B | 0.597 | T | 0.120 | 0.062 | Benign   | n/a  | 0.4   | TOPMED        |                        |
| 63486615 | A | G | rs777673950  | K | R | 706 | 0.000 | B | 0.419 | T | 0.023 | 0.013 | Benign   | 0.4  | 0.8   | ExAC          |                        |



Table S1

|          |   |   |              |   |   |     |       |   |       |   |       |       |          |     |       |               |
|----------|---|---|--------------|---|---|-----|-------|---|-------|---|-------|-------|----------|-----|-------|---------------|
| 63486620 | G | A | rs1303374381 | D | N | 708 | 0.990 | D | 0.201 | T | 0.752 | 0.137 |          | 0.4 | 0.4   | GnomAD_exomes |
| 63486627 | A | G | rs770923059  | N | S | 710 | 0.000 | B | 0.916 | T | 0.035 | 0.024 | Benign   | 0.4 | 1.7   | ExAC          |
| 63486631 | G | T | rs2029958548 | Q | H | 711 | 0.000 | B | 0.158 | T | 0.053 | 0.024 | Benign   | n/a | 0.4   | TOPMED        |
| 63486640 | C | A | rs778987310  | N | K | 714 | 0.012 | B | 0.015 | D | 0.222 | 0.084 | Benign   | 0.8 | 0.8   | ExAC          |
| 63486644 | A | G | rs745422986  | T | A | 716 | 0.012 | B | 0.447 | T | 0.077 | 0.097 | Benign   | 2.4 | 2.4   | GnomAD_exomes |
| 63486649 | C | G | rs771585066  | I | M | 717 | 0.001 | B | 0.114 | T | 0.036 | 0.033 | Benign   | 0.4 | 0.8   | ExAC          |
| 63486651 | A | G | rs1316503803 | K | R | 718 | 0.286 | B | 0.295 | T | 0.097 | 0.135 | Benign   | 0.4 | 0.7   | GnomAD        |
| 63486653 | C | T | rs200649158  | R | W | 719 | 1.000 | D | 0.000 | D | 0.936 | 0.605 | Damaging | 5.6 | 48.7  | TOPMED        |
| 63486654 | G | A | rs371010069  | R | Q | 719 | 0.995 | D | 0.029 | D | 0.765 | 0.494 | Damaging | 2.4 | 17.9  | TOMMO         |
| 63486659 | A | G | rs769028657  | I | V | 721 | 0.006 | B | 0.076 | T | 0.123 | 0.043 | Benign   | 0.4 | 0.8   | ExAC          |
| 63486661 | A | G | rs1424703433 | I | M | 721 | 0.023 | B | 0.038 | D | 0.142 | 0.079 | Benign   | n/a | 22.4  | dbGaP_PopFreq |
| 63486664 | G | C | rs188993222  | K | N | 722 | 0.123 | B | 0.089 | T | 0.096 | 0.042 | Benign   | 0.8 | 20.0  | 1000Genomes   |
| 63486671 | C | G | rs139263584  | Q | E | 725 | 0.393 | B | 0.846 | T | 0.254 | 0.121 | Benign   | 1.2 | 7.7   | GoESP         |
| 63486673 | G | T | rs2029962852 | Q | H | 725 | 0.904 | P | 0.187 | T | 0.326 | 0.270 | Benign   | n/a | 0.8   | TOPMED        |
| 63486675 | A | T | rs1420953232 | D | V | 726 | 0.946 | D | 0.454 | T | 0.201 | 0.102 | Benign   | 0.4 | 0.4   | GnomAD_exomes |
| 63486678 | T | G | rs2029963533 | L | R | 727 | 0.696 | P | 0.047 | D | 0.599 | 0.282 | Damaging | n/a | 6.0   | TOMMO         |
| 63486683 | C | T | rs375232467  | R | W | 729 | 1.000 | D | 0.040 | D | 0.635 | 0.332 | Damaging | 1.6 | 7.7   | GoESP         |
| 63486684 | G | A | rs201527082  | R | Q | 729 | 0.994 | D | 0.602 | T | 0.133 | 0.180 | Benign   | 2.4 | 103.0 | KOREAN        |
| 63486686 | G | T | rs2029964544 | A | S | 730 | 0.968 | D | 0.268 | T | 0.582 | 0.176 |          | n/a | 6.0   | TOMMO         |
| 63486687 | C | A | rs767880620  | A | E | 730 | 0.999 | D | 0.021 | D | 0.833 | 0.330 | Damaging | 8.4 | 187.0 | MGP           |
| 63486690 | C | T | rs1374995262 | A | V | 731 | 0.013 | B | 0.155 | T | 0.153 | 0.070 | Benign   | 0.4 | 7.1   | GnomAD        |
| 63486698 | G | T | rs199785479  | A | S | 734 | 0.011 | B | 0.654 | T | 0.135 | 0.031 | Benign   | 0.8 | 7.7   | GoESP         |
| 63486701 | C | T | rs933390771  | Q | X | 735 |       |   | n/a   |   | 0.820 | n/a   |          | 0.8 | 0.8   | GnomAD_exomes |
| 63486708 | T | A | rs757100327  | L | Q | 737 | 0.999 | D | 0.073 | T | 0.945 | 0.400 |          | 0.4 | 3.1   | dbGaP_PopFreq |
| 63486711 | A | T | rs1334538300 | E | V | 738 | 0.048 | B | 0.144 | T | 0.367 | 0.078 | Benign   | n/a | 0.7   | GnomAD        |
| 63486991 | C | A | rs779433192  | N | K | 741 | 0.996 | D | 0.109 | T | 0.610 | 0.209 |          | 0.4 | 0.8   | ExAC          |
| 63486992 | A | G | rs2029992650 | K | E | 742 | 0.001 | B | 0.864 | T | 0.156 | 0.026 | Benign   | n/a | 0.7   | GnomAD        |
| 63486993 | A | G | rs2029992890 | K | R | 742 | 0.001 | B | 0.521 | T | 0.159 | 0.082 | Benign   | n/a | 0.7   | GnomAD        |
| 63486997 | C | G | rs1401450584 | I | M | 743 | 0.846 | P | 0.034 | D | 0.445 | 0.220 | Benign   | 0.4 | 0.4   | GnomAD_exomes |
| 63487008 | T | C | rs2029994732 | M | T | 747 | 0.997 | D | 0.001 | D | 0.854 | 0.554 | Damaging | n/a | 6.0   | TOMMO         |
| 63487010 | G | A | rs921762904  | E | K | 748 | 0.999 | D | 0.171 | T | 0.691 | 0.294 |          | n/a | 0.4   | TOPMED        |
| 63487011 | A | G | rs1362206431 | E | G | 748 | 1.000 | D | 0.064 | T | 0.629 | 0.385 |          | n/a | 0.7   | GnomAD        |
| 63487013 | A | C | rs1599146760 | T | P | 749 | 0.911 | D | 0.063 | T | 0.415 | 0.335 | Benign   | n/a | 109.0 | Korea1K       |
| 63487016 | A | C | rs1599146771 | T | P | 750 | 0.298 | B | 0.148 | T | 0.458 | 0.131 | Benign   | n/a | 218.0 | Korea1K       |
| 63487017 | C | T | rs2029996149 | T | I | 750 | 0.005 | B | 1.000 | T | 0.159 | 0.048 | Benign   | n/a | 0.7   | GnomAD        |
| 63487023 | G | T | rs2029996374 | S | I | 752 | 0.929 | D | 0.055 | T | 0.846 | 0.388 |          | n/a | 6.0   | TOMMO         |
| 63487025 | G | A | rs140129129  | V | M | 753 | 0.075 | B | 0.182 | T | 0.331 | 0.026 | Benign   | 0.4 | 27.0  | TWINSUK       |
| 63487028 | G | C | rs1202344569 | A | P | 754 | 0.943 | D | 0.009 | D | 0.863 | 0.443 | Damaging | n/a | 22.4  | dbGaP_PopFreq |
| 63487029 | C | T | rs1319509042 | A | V | 754 | 0.830 | P | 0.088 | T | 0.657 | 0.191 | Benign   | 0.4 | 1.4   | GnomAD        |
| 63487031 | A | G | rs2029998101 | T | A | 755 | 0.002 | B | 0.130 | T | 0.160 | 0.025 | Benign   | n/a | 4.7   | dbGaP_PopFreq |
| 63487032 | C | T | rs200503880  | T | I | 755 | 0.095 | B | 0.032 | D | 0.164 | 0.160 | Benign   | 0.4 | 20.0  | 1000Genomes   |

Uncertain\_significance

Table S1

|          |   |   |              |   |   |     |       |   |       |   |       |       |          |       |       |               |                        |
|----------|---|---|--------------|---|---|-----|-------|---|-------|---|-------|-------|----------|-------|-------|---------------|------------------------|
| 63487034 | G | T | rs773578992  | V | L | 756 | 0.364 | B | 0.036 | D | 0.429 | 0.276 | Benign   | 0.4   | 0.8   | ExAC          |                        |
| 63487035 | T | C | rs377567489  | V | A | 756 | 0.907 | P | 0.195 | T | 0.546 | 0.242 | Benign   | n/a   | 15.4  | GoESP         |                        |
| 63487038 | G | A | rs1232177858 | C | Y | 757 | 0.999 | D | 0.001 | D | 0.890 | 0.643 | Damaging | 0.8   | 0.8   | GnomAD_exomes |                        |
| 63487041 | A | C | rs1599146831 | H | P | 758 | 0.174 | B | 0.277 | T | 0.260 | 0.094 | Benign   | n/a   | 218.0 | Korea1K       |                        |
| 63487043 | C | T | rs1180603936 | P | S | 759 | 0.000 | B | 0.686 | T | 0.120 | 0.020 | Benign   | n/a   | 0.7   | GnomAD        |                        |
| 63487044 | C | A | rs143843660  | P | Q | 759 | 0.001 | B | 0.556 | T | 0.187 | 0.022 | Benign   | 0.4   | 7.7   | GoESP         |                        |
| 63487056 | G | A | rs370481039  | C | Y | 763 | 0.999 | D | 0.008 | D | 0.948 | 0.590 | Damaging | 3.6   | 7.7   | GoESP         |                        |
| 63487059 | T | A | rs145819052  | L | Q | 764 | 0.662 | P | 0.018 | D | 0.637 | 0.298 | Damaging | 24.8  | 28.3  | ExAC          |                        |
| 63487067 | G | A | rs148995315  | E | K | 767 | 0.818 | P | 0.021 | D | 0.554 | 0.283 | Damaging | 26.4  | 67.0  | Estonian      | Uncertain_significance |
| 63487068 | A | G | rs1421152152 | E | G | 767 | 0.895 | P | 0.064 | T | 0.335 | 0.239 | Benign   | n/a   | 22.3  | Estonian      |                        |
| 63488648 | A | G | rs5559834728 | D | G | 769 | 0.613 | P | 0.146 | T | 0.589 | 0.361 | Benign   | 2.4   | 20.0  | 1000Genomes   |                        |
| 63488650 | C | G | rs374146846  | L | V | 770 | 0.994 | D | 0.047 | D | 0.439 | 0.283 |          | 1.6   | 7.7   | GoESP         |                        |
| 63488654 | C | T | rs780755664  | T | M | 771 | 0.918 | D | 0.105 | T | 0.625 | 0.292 |          | 0.8   | 3.8   | TOPMED        |                        |
| 63488659 | G | A | rs143830698  | V | M | 773 | 0.018 | B | 0.037 | D | 0.126 | 0.019 | Benign   | 8.4   | 100.0 | GoNL          |                        |
| 63488662 | A | G | rs559585445  | M | V | 774 | 0.408 | B | 0.029 | D | 0.694 | 0.274 |          | 3.2   | 100.0 | GoNL          | Uncertain_significance |
| 63488668 | A | G | rs199869667  | T | A | 776 | 0.043 | B | 0.401 | T | 0.404 | 0.205 | Benign   | 2.8   | 20.0  | 1000Genomes   |                        |
| 63488669 | C | T | rs769940023  | T | M | 776 | 0.796 | P | 0.057 | T | 0.453 | 0.204 | Benign   | 0.8   | 1.7   | ExAC          |                        |
| 63488674 | C | T | rs745724462  | R | W | 778 | 0.988 | D | 0.001 | D | 0.707 | 0.466 | Damaging | 16.3  | 13.2  | ExAC          |                        |
| 63488675 | G | A | rs771819046  | R | Q | 778 | 0.194 | B | 0.045 | D | 0.370 | 0.204 | Benign   | 2.0   | 2.8   | dbGaP_PopFreq |                        |
| 63488688 | C | A | rs760477392  | D | E | 782 | 0.000 | B | 1.000 | T | 0.092 | 0.154 | Benign   | 1.2   | 4.9   | TOPMED        |                        |
| 63488693 | T | C | rs1162307952 | L | S | 784 | 0.228 | B | 0.215 | T | 0.459 | 0.252 | Benign   | 0.4   | 0.4   | GnomAD_exomes |                        |
| 63488695 | T | G | rs763670346  | W | G | 785 | 0.666 | P | 0.043 | D | 0.534 | 0.284 | Damaging | 0.8   | 4.7   | dbGaP_PopFreq |                        |
| 63488699 | C | T | rs1568043027 | A | V | 786 | 0.029 | B | 0.703 | T | 0.233 | 0.071 | Benign   | n/a   | 103.0 | KOREAN        |                        |
| 63488703 | G | A | rs775934699  | W | X | 787 |       |   | n/a   |   | 0.904 | n/a   |          | 0.4   | 0.8   | ExAC          |                        |
| 63488704 | G | A | rs761401927  | E | K | 788 | 0.002 | B | 1.000 | T | 0.138 | 0.033 | Benign   | 9.1   | 9.2   | GnomAD_exomes |                        |
| 63488706 | G | T | rs565463716  | E | D | 788 | 0.001 | B | 0.184 | T | 0.142 | 0.042 | Benign   | n/a   | 20.0  | 1000Genomes   |                        |
| 63488708 | G | A | rs953051570  | G | D | 789 | 0.618 | P | 0.076 | T | 0.590 | 0.233 | Benign   | 0.4   | 1.1   | TOPMED        |                        |
| 63488714 | G | A | rs755385604  | R | Q | 791 | 0.996 | D | 0.012 | D | 0.717 | 0.442 | Damaging | 2.0   | 6.0   | TOMMO         |                        |
| 63488716 | G | C | rs1291650441 | D | H | 792 | 0.868 | P | 0.020 | D | 0.608 | 0.250 | Damaging | 0.8   | 5.1   | dbGaP_PopFreq |                        |
| 63488720 | A | T | rs748246753  | K | M | 793 | 0.324 | B | 0.037 | D | 0.439 | 0.174 | Benign   | n/a   | 6.0   | TOMMO         |                        |
| 63488722 | G | A | rs756178155  | A | T | 794 | 0.006 | B | 0.407 | T | 0.081 | 0.071 | Benign   | 0.4   | 0.8   | ExAC          |                        |
| 63488723 | C | T | rs373970727  | A | V | 794 | 0.003 | B | 1.000 | T | 0.095 | 0.022 | Benign   | 2.8   | 83.5  | TOMMO         |                        |
| 63488725 | G | A | rs2030160089 | G | R | 795 | 1.000 | D | 0.001 | D | 0.943 | 0.717 | Damaging | n/a   | 0.4   | TOPMED        |                        |
| 63488729 | G | A | rs2030160538 | R | K | 796 | 0.002 | B | 0.801 | T | 0.106 | 0.048 | Benign   | n/a   | 11.9  | TOMMO         |                        |
| 63488731 | G | A | rs1486364002 | A | T | 797 | 0.001 | B | 0.489 | T | 0.148 | 0.073 | Benign   | 0.4   | 0.4   | GnomAD_exomes |                        |
| 63488732 | C | T | rs1455404812 | A | V | 797 | 0.003 | B | 0.316 | T | 0.122 | 0.055 | Benign   | n/a   | 6.0   | TOMMO         |                        |
| 63488734 | A | G | rs117647476  | I | V | 798 | 0.004 | B | 0.352 | T | 0.134 | 0.046 | Benign   | 213.1 | 871.0 | Estonian      | Likely_benign          |
| 63488737 | C | T | rs2030162108 | L | F | 799 | 0.939 | D | 0.008 | D | 0.369 | 0.240 |          | n/a   | 0.4   | TOPMED        |                        |
| 63488738 | T | C | rs2030162361 | L | P | 799 | 0.939 | D | 0.043 | D | 0.647 | 0.184 | Damaging | n/a   | 1.1   | TOPMED        |                        |
| 63488740 | C | T | rs1568043111 | Q | X | 800 |       |   | n/a   |   | 0.908 | n/a   |          | 0.4   | 0.4   | GnomAD_exomes |                        |
| 63488742 | G | C | rs567706604  | Q | H | 800 | 0.003 | B | 0.135 | T | 0.260 | 0.082 | Benign   | 1.2   | 187.0 | MGP           |                        |

Table S1

|          |   |   |              |   |   |     |       |   |       |   |       |       |          |      |        |               |                        |
|----------|---|---|--------------|---|---|-----|-------|---|-------|---|-------|-------|----------|------|--------|---------------|------------------------|
| 63488750 | C | T | rs367822781  | P | L | 803 | 0.913 | D | 0.277 | T | 0.453 | 0.135 | Benign   | 6.4  | 23.1   | GoESP         |                        |
| 63488758 | G | A | rs769397961  | V | M | 806 | 1.000 | D | 0.009 | D | 0.896 | 0.477 | Damaging | 1.2  | 4.2    | TOPMED        |                        |
| 63488764 | C | T | rs773031583  | L | F | 808 | 0.087 | B | 0.068 | T | 0.261 | 0.179 | Benign   | 0.4  | 1.4    | GnomAD        |                        |
| 63488767 | A | G | rs762647568  | I | V | 809 | 0.007 | B | 0.219 | T | 0.111 | 0.032 | Benign   | 3.6  | 4.1    | ExAC          |                        |
| 63488771 | A | G | rs1206246426 | N | S | 810 | 0.995 | D | 0.004 | D | 0.941 | 0.624 | Damaging | n/a  | 22.4   | dbGaP_PopFreq |                        |
| 63488774 | A | G | rs1255043434 | Q | R | 811 | 0.017 | B | 0.112 | T | 0.191 | 0.090 | Benign   | n/a  | 7.1    | dbGaP_PopFreq |                        |
| 63488777 | C | T | rs751806358  | A | V | 812 | 0.533 | P | 0.053 | T | 0.419 | 0.256 | Benign   | 0.4  | 0.8    | ExAC          |                        |
| 63488782 | C | T | rs142799747  | R | W | 814 | 0.007 | B | 0.003 | D | 0.489 | 0.080 | Benign   | 1.2  | 34.2   | KOREAN        |                        |
| 63488783 | G | A | rs375979946  | R | Q | 814 | 0.001 | B | 0.276 | T | 0.107 | 0.087 | Benign   | 10.7 | 10.7   | GnomAD_exomes |                        |
| 63488785 | C | T | rs935705219  | L | F | 815 | 0.967 | D | 0.065 | T | 0.556 | 0.272 |          | n/a  | 0.7    | GnomAD        |                        |
| 63488789 | A | G | rs777776998  | N | S | 816 | 0.853 | P | 0.015 | D | 0.707 | 0.427 | Damaging | 1.2  | 6.0    | TOMMO         |                        |
| 63488944 | A | T | rs369245002  | Y | F | 818 | 0.015 | B | 0.488 | T | 0.235 | 0.137 | Benign   | 2.0  | 25.9   | ALSPAC        |                        |
| 63488947 | T | C | rs1568043314 | V | A | 819 | 0.002 | B | 0.812 | T | 0.077 | 0.072 | Benign   | 0.8  | 0.8    | GnomAD_exomes |                        |
| 63488949 | G | A | rs1018632632 | D | N | 820 | 0.784 | P | 0.089 | T | 0.590 | 0.383 | Benign   | 1.2  | 3.0    | dbGaP_PopFreq |                        |
| 63488952 | G | T | rs2030182044 | A | S | 821 | 0.246 | B | 0.423 | T | 0.205 | 0.140 | Benign   | n/a  | 3.1    | dbGaP_PopFreq |                        |
| 63488953 | C | T | rs781086412  | A | V | 821 | 0.232 | B | 0.508 | T | 0.257 | 0.084 | Benign   | 0.4  | 0.8    | ExAC          |                        |
| 63488956 | G | A | rs1340223445 | G | E | 822 | 0.986 | D | 0.001 | D | 0.959 | 0.715 | Damaging | n/a  | 1.1    | TOPMED        |                        |
| 63488958 | G | A | rs995556379  | D | N | 823 | 0.609 | P | 0.182 | T | 0.380 | 0.189 | Benign   | n/a  | 0.4    | TOPMED        |                        |
| 63488959 | A | T | rs777851729  | D | V | 823 | 0.032 | B | 0.089 | T | 0.431 | 0.179 | Benign   | 2.8  | 4.9    | dbGaP_PopFreq |                        |
| 63488961 | T | C | rs2030184043 | S | P | 824 | 0.870 | P | 0.144 | T | 0.661 | 0.224 | Benign   | n/a  | 0.4    | TOPMED        |                        |
| 63488966 | G | A | rs2030184791 | W | X | 825 |       |   | n/a   |   | 0.964 | n/a   |          | n/a  | 0.4    | TOPMED        |                        |
| 63488971 | C | G | rs200757344  | S | C | 827 | 0.864 | P | 0.010 | D | 0.525 | 0.367 | Damaging | 0.8  | 109.0  | Korea1K       |                        |
| 63488973 | A | G | rs890006891  | M | V | 828 | 0.001 | B | 0.299 | T | 0.174 | 0.046 | Benign   | 0.4  | 7.1    | dbGaP_PopFreq |                        |
| 63488974 | T | C | rs13306091   | M | T | 828 | 0.072 | B | 0.577 | T | 0.192 | 0.056 | Benign   | 8.0  | 5320.0 | TOMMO         | Uncertain_significance |
| 63488979 | G | A | rs267604983  | E | K | 830 | 0.508 | P | 0.003 | D | 0.877 | 0.586 | Damaging | 0.8  | 20.0   | 1000Genomes   |                        |
| 63488983 | C | T | rs777098855  | T | I | 831 | 0.482 | P | 0.262 | T | 0.166 | 0.057 | Benign   | 0.4  | 0.8    | ExAC          |                        |
| 63488986 | C | T | rs761838241  | P | L | 832 | 0.752 | P | 0.059 | T | 0.553 | 0.149 | Benign   | 0.4  | 68.4   | KOREAN        |                        |
| 63488989 | C | T | rs1568043397 | S | F | 833 | 0.006 | B | 0.279 | T | 0.234 | 0.056 | Benign   | 0.4  | 0.4    | GnomAD_exomes |                        |
| 63488995 | A | G | rs2030188578 | E | G | 835 | 0.998 | D | 0.043 | D | 0.798 | 0.729 | Damaging | n/a  | 11.9   | TOMMO         |                        |
| 63488997 | C | T | rs1405858837 | Q | X | 836 |       |   | n/a   |   | 0.885 | n/a   |          | 1.2  | 1.2    | GnomAD_exomes |                        |
| 63488998 | A | C | rs1599149424 | Q | P | 836 | 0.006 | B | 0.041 | D | 0.500 | 0.173 | Benign   | n/a  | 54.6   | Korea1K       |                        |
| 63489003 | C | G | rs2030189487 | L | V | 838 | 0.073 | B | 0.496 | T | 0.633 | 0.188 | Benign   | n/a  | 0.4    | TOPMED        |                        |
| 63489009 | C | T | rs3730036    | R | W | 840 | 0.612 | P | 0.011 | D | 0.441 | 0.145 | Benign   | 2.8  | 465.0  | PAGE_STUDY    |                        |
| 63489010 | G | A | rs767425642  | R | Q | 840 | 0.002 | B | 0.830 | T | 0.077 | 0.013 | Benign   | 3.2  | 0.8    | TOPMED        |                        |
| 63489012 | C | T | rs2030190997 | L | F | 841 | 0.293 | B | 0.002 | D | 0.576 | 0.222 |          | n/a  | 0.4    | TOPMED        |                        |
| 63489016 | T | C | rs537201274  | F | S | 842 | 0.365 | B | 0.002 | D | 0.646 | 0.216 |          | 0.4  | 20.0   | 1000Genomes   |                        |
| 63489019 | A | C | rs1314869920 | Q | P | 843 | 0.239 | B | 0.144 | T | 0.534 | 0.241 | Benign   | n/a  | 0.8    | TOPMED        |                        |
| 63489033 | C | G | rs1263864253 | L | V | 848 | 0.968 | D | 0.006 | D | 0.826 | 0.421 | Damaging | n/a  | 0.8    | TOPMED        |                        |
| 63489037 | A | G | rs2030193846 | Y | C | 849 | 0.998 | D | 0.000 | D | 0.949 | 0.765 | Damaging | n/a  | 0.4    | TOPMED        |                        |
| 63489042 | A | C | rs1599149517 | N | H | 851 | 0.674 | P | 0.149 | T | 0.362 | 0.230 | Benign   | n/a  | 109.0  | Korea1K       |                        |
| 63489048 | C | T | rs377172559  | H | Y | 853 | 0.999 | D | 0.002 | D | 0.931 | 0.745 | Damaging | 0.4  | 7.7    | GoESP         |                        |



Table S1

|          |   |   |              |   |   |     |       |   |       |   |       |       |          |      |        |               |                        |
|----------|---|---|--------------|---|---|-----|-------|---|-------|---|-------|-------|----------|------|--------|---------------|------------------------|
| 63489051 | G | A | rs2030195429 | A | T | 854 | 0.999 | D | 0.050 | T | 0.806 | 0.442 | n/a      | 0.4  | TOPMED |               |                        |
| 63489052 | C | A | rs1258657289 | A | D | 854 | 0.999 | D | 0.002 | D | 0.906 | 0.711 | Damaging | 0.4  | 0.8    | TOPMED        |                        |
| 63489055 | A | G | rs1290778035 | Y | C | 855 | 0.997 | D | 0.000 | D | 0.713 | 0.593 | Damaging | n/a  | 3.1    | dbGaP_PopFreq |                        |
| 63489057 | G | A | rs369111551  | V | M | 856 | 0.936 | D | 0.001 | D | 0.751 | 0.461 | Damaging | 2.8  | 23.1   | GoESP         |                        |
| 63489060 | C | T | rs989791368  | R | C | 857 | 1.000 | D | 0.000 | D | 0.947 | 0.864 | Damaging | n/a  | 0.8    | TOPMED        |                        |
| 63489061 | G | A | rs146089353  | R | H | 857 | 0.999 | D | 0.032 | D | 0.972 | 0.759 | Damaging | 3.2  | 34.2   | KOREAN        | Uncertain_significance |
| 63489063 | C | T | rs762333619  | R | W | 858 | 1.000 | D | 0.022 | D | 0.866 | 0.460 | Damaging | 1.2  | 6.0    | TOMMO         |                        |
| 63489064 | G | A | rs765246562  | R | Q | 858 | 0.997 | D | 0.035 | D | 0.524 | 0.516 | Damaging | 11.6 | 13.2   | ExAC          |                        |
| 63489066 | G | A | rs1474446784 | A | T | 859 | 0.672 | P | 0.144 | T | 0.490 | 0.133 | Benign   | 0.4  | 0.4    | GnomAD_exomes |                        |
| 63489069 | C | G | rs1164595381 | L | V | 860 | 0.994 | D | 0.000 | D | 0.709 | 0.534 | Damaging | 0.4  | 0.4    | GnomAD_exomes |                        |
| 63489070 | T | C | rs773277069  | L | P | 860 | 1.000 | D | 0.000 | D | 0.830 | 0.733 | Damaging | 0.8  | 1.7    | ExAC          |                        |
| 63489072 | C | T | rs140056206  | H | Y | 861 | 0.006 | B | 1.000 | T | 0.178 | 0.046 | Benign   | 5.6  | 29.3   | PAGE_STUDY    |                        |
| 63489075 | C | T | rs751363862  | R | C | 862 | 0.850 | P | 0.011 | D | 0.491 | 0.365 | Benign   | 1.6  | 25.9   | ALSPAC        |                        |
| 63489076 | G | A | rs756018518  | R | H | 862 | 0.010 | B | 0.134 | T | 0.231 | 0.050 | Benign   | 3.6  | 8.7    | dbGaP_PopFreq |                        |
| 63489084 | G | A | rs939884644  | G | R | 865 | 1.000 | D | 0.001 | D | 0.946 | 0.732 | Damaging | 2.0  | 2.0    | GnomAD_exomes |                        |
| 63489087 | G | T | rs1037068942 | A | S | 866 | 0.004 | B | 0.946 | T | 0.108 | 0.035 | Benign   | n/a  | 2.1    | GnomAD        |                        |
| 63489090 | C | T | rs1413766379 | Q | X | 867 |       |   | n/a   |   | 0.886 | n/a   |          | 0.4  | 11.1   | dbGaP_PopFreq |                        |
| 63489095 | C | G | rs753727679  | H | Q | 868 | 0.106 | B | 0.293 | T | 0.228 | 0.085 | Benign   | 2.0  | 0.8    | ExAC          |                        |
| 63489096 | A | G | rs757164151  | I | V | 869 | 0.013 | B | 0.626 | T | 0.205 | 0.073 | Benign   | 0.8  | 2.5    | ExAC          |                        |
| 63489103 | T | A | rs1272138201 | L | Q | 871 | 0.999 | D | 0.579 | T | 0.676 | 0.450 |          | 0.4  | 5.5    | dbGaP_PopFreq |                        |
| 63489117 | C | T | rs757874491  | P | S | 876 | 0.999 | D | 0.000 | D | 0.959 | 0.892 | Damaging | 1.2  | 1.2    | GnomAD_exomes | Uncertain_significance |
| 63489121 | C | G | rs931392712  | A | G | 877 | 0.996 | D | 0.009 | D | 0.671 | 0.600 | Damaging | n/a  | 0.4    | TOPMED        |                        |
| 63489123 | C | A | rs781252796  | H | N | 878 | 0.990 | D | 0.005 | D | 0.964 | 0.611 | Damaging | n/a  | 25.9   | ALSPAC        |                        |
| 63489125 | C | G | rs200196657  | H | Q | 878 | 0.985 | D | 0.009 | D | 0.975 | 0.519 | Damaging | 1.2  | 27.0   | TWINSUK       |                        |
| 63490954 | G | A | rs1232536510 | G | E | 881 | 1.000 | D | 0.000 | D | 0.979 | 0.866 | Damaging | 0.8  | 8.7    | dbGaP_PopFreq |                        |
| 63490957 | A | G | rs771162255  | N | S | 882 | 0.997 | D | 0.003 | D | 0.910 | 0.557 | Damaging | 0.8  | 1.7    | ExAC          |                        |
| 63490959 | A | G | rs774518339  | M | V | 883 | 0.994 | D | 0.033 | D | 0.948 | 0.716 | Damaging | 0.4  | 0.8    | ExAC          |                        |
| 63490960 | T | C | rs1267969615 | M | T | 883 | 1.000 | D | 0.002 | D | 0.986 | 0.622 | Damaging | 0.4  | 0.4    | GnomAD_exomes |                        |
| 63490961 | G | A | rs759679121  | M | I | 883 | 0.996 | D | 0.046 | D | 0.921 | 0.604 | Damaging | 2.4  | 4.1    | ExAC          |                        |
| 63490962 | T | C | rs568842388  | W | R | 884 | 1.000 | D | 0.000 | D | 0.986 | 0.645 | Damaging | 3.6  | 20.0   | 1000Genomes   |                        |
| 63490965 | G | C | rs1173972262 | A | P | 885 | 0.071 | B | 0.003 | D | 0.933 | 0.430 |          | n/a  | 0.4    | TOPMED        |                        |
| 63490966 | C | T | rs1251602237 | A | V | 885 | 0.803 | P | 0.002 | D | 0.860 | 0.361 | Damaging | 0.4  | 7.1    | dbGaP_PopFreq |                        |
| 63490971 | A | G | rs1181835738 | T | A | 887 | 0.157 | B | 0.071 | T | 0.606 | 0.173 | Benign   | 0.4  | 1.1    | TOPMED        |                        |
| 63490972 | C | A | rs761719023  | T | N | 887 | 0.752 | P | 0.148 | T | 0.549 | 0.045 | Benign   | 0.4  | 6.0    | TOMMO         |                        |
| 63490975 | G | C | rs1468320560 | W | S | 888 | 1.000 | D | 0.000 | D | 0.949 | 0.593 | Damaging | 0.4  | 0.4    | GnomAD_exomes |                        |
| 63490976 | G | C | rs1157631466 | W | C | 888 | 1.000 | D | 0.000 | D | 0.973 | 0.699 | Damaging | 0.4  | 3.1    | dbGaP_PopFreq |                        |
| 63490987 | A | G | rs750406199  | Y | C | 892 | 0.993 | D | 0.033 | D | 0.762 | 0.359 | Damaging | 0.4  | 11.9   | TOMMO         |                        |
| 63490988 | T | G | rs762809850  | Y | X | 892 |       |   | n/a   |   | 0.907 | n/a   |          | 0.4  | 0.8    | ExAC          |                        |
| 63490992 | T | A | rs150057535  | L | M | 894 | 0.712 | P | 0.060 | T | 0.528 | 0.162 | Benign   | n/a  | 7.7    | GoESP         |                        |
| 63490995 | G | T | rs1393589215 | V | L | 895 | 0.048 | B | 0.177 | T | 0.482 | 0.120 | Benign   | 0.4  | 0.4    | GnomAD_exomes |                        |
| 63490998 | G | A | rs145422285  | V | M | 896 | 0.039 | B | 0.156 | T | 0.295 | 0.042 | Benign   | 0.4  | 7.7    | GoESP         |                        |

Table S1

|          |   |   |              |   |   |     |       |   |       |   |       |       |          |       |        |               |                      |
|----------|---|---|--------------|---|---|-----|-------|---|-------|---|-------|-------|----------|-------|--------|---------------|----------------------|
| 63491008 | C | T | rs2030335337 | P | L | 899 | 0.984 | D | 0.004 | D | 0.838 | 0.382 | Damaging | n/a   | 0.4    | TOPMED        |                      |
| 63491013 | G | T | rs752266791  | A | S | 901 | 0.561 | P | 0.340 | T | 0.525 | 0.121 | Benign   | 2.4   | 5.1    | dbGaP_PopFreq |                      |
| 63491020 | C | G | rs558504919  | S | W | 903 | 0.429 | B | 0.019 | D | 0.371 | 0.056 | Benign   | 0.8   | 100.0  | GoNL          |                      |
| 63491023 | T | C | rs779560946  | M | T | 904 | 0.029 | B | 0.119 | T | 0.466 | 0.176 | Benign   | 0.4   | 0.8    | ExAC          |                      |
| 63491026 | A | G | rs745987517  | D | G | 905 | 0.973 | D | 0.005 | D | 0.964 | 0.810 | Damaging | 0.4   | 1.1    | TOPMED        |                      |
| 63491028 | A | G | rs1274588146 | T | A | 906 | 0.000 | B | 0.576 | T | 0.307 | 0.069 | Benign   | 0.4   | 0.7    | GnomAD        |                      |
| 63491029 | C | T | rs772024137  | T | I | 906 | 0.007 | B | 0.313 | T | 0.400 | 0.062 | Benign   | 0.8   | 11.1   | dbGaP_PopFreq |                      |
| 63491034 | G | A | rs747159428  | E | K | 908 | 0.117 | B | 0.704 | T | 0.460 | 0.062 | Benign   | 2.0   | 2.0    | GnomAD_exomes |                      |
| 63491037 | G | T | rs1290624816 | A | S | 909 | 0.126 | B | 0.330 | T | 0.627 | 0.117 | Benign   | n/a   | 0.4    | TOPMED        |                      |
| 63491047 | A | G | rs1329922107 | K | R | 912 | 0.002 | B | 0.381 | T | 0.362 | 0.019 | Benign   | n/a   | 2.1    | GnomAD        |                      |
| 63491049 | C | G | rs372614913  | Q | E | 913 | 0.092 | B | 0.052 | T | 0.663 | 0.164 | Benign   | 0.4   | 9.4    | dbGaP_PopFreq |                      |
| 63491050 | A | G | rs1026599078 | Q | R | 913 | 0.008 | B | 0.005 | D | 0.525 | 0.165 |          | 2.4   | 9.4    | dbGaP_PopFreq |                      |
| 63491210 | G | A | rs1362563545 | G | D | 914 | 0.481 | P | 0.061 | T | 0.610 | 0.259 | Benign   | n/a   | 0.4    | TOPMED        |                      |
| 63491213 | G | C | rs1271898535 | W | S | 915 | 0.989 | D | 0.001 | D | 0.863 | 0.597 | Damaging | n/a   | 0.7    | GnomAD        |                      |
| 63491215 | A | G | rs755053417  | T | A | 916 | 0.422 | B | 0.016 | D | 0.638 | 0.200 |          | 0.4   | 0.8    | ExAC          |                      |
| 63491216 | C | T | rs3730043    | T | M | 916 | 0.969 | D | 0.002 | D | 0.646 | 0.216 | Damaging | 396.7 | 2120.0 | HapMap        | Benign/Likely_benign |
| 63491218 | C | G | rs748317639  | P | A | 917 | 0.070 | B | 0.627 | T | 0.183 | 0.123 | Benign   | 0.4   | 2.8    | dbGaP_PopFreq |                      |
| 63491219 | C | G | rs770741758  | P | R | 917 | 0.989 | D | 0.016 | D | 0.608 | 0.369 | Damaging | 0.8   | 0.8    | ExAC          |                      |
| 63491225 | G | A | rs1599151901 | R | K | 919 | 0.013 | B | 0.876 | T | 0.154 | 0.082 | Benign   | n/a   | 34.2   | KOREAN        |                      |
| 63491228 | T | C | rs745827618  | M | T | 920 | 0.948 | D | 0.001 | D | 0.829 | 0.755 | Damaging | 0.4   | 0.8    | ExAC          |                      |
| 63491233 | A | G | rs551723440  | K | E | 922 | 0.000 | B | 1.000 | T | 0.086 | 0.031 | Benign   | 0.4   | 1.3    | PAGE_STUDY    |                      |
| 63491254 | A | C | rs1005152265 | T | P | 929 | 0.190 | B | 0.034 | D | 0.537 | 0.253 |          | n/a   | 328.0  | Korea1K       |                      |
| 63491258 | C | T | rs1231385013 | S | F | 930 | 1.000 | D | 0.001 | D | 0.989 | 0.688 | Damaging | 0.4   | 0.4    | GnomAD_exomes |                      |
| 63491261 | T | C | rs1317192622 | L | P | 931 | 1.000 | D | 0.001 | D | 0.920 | 0.866 | Damaging | 0.4   | 0.4    | GnomAD_exomes |                      |
| 63491263 | G | C | rs1335323894 | G | R | 932 | 1.000 | D | 0.001 | D | 0.967 | 0.660 | Damaging | 0.4   | 2.1    | GnomAD        |                      |
| 63491264 | G | C | rs768235439  | G | A | 932 | 0.998 | D | 0.002 | D | 0.950 | 0.716 | Damaging | 0.4   | 0.8    | ExAC          |                      |
| 63491272 | C | T | rs199555061  | P | S | 935 | 0.922 | D | 0.133 | T | 0.609 | 0.184 |          | 1.2   | 77.6   | TOMMO         |                      |
| 63491273 | C | T | rs537884559  | P | L | 935 | 0.984 | D | 0.010 | D | 0.684 | 0.405 | Damaging | 8.0   | 39.9   | 1000Genomes   |                      |
| 63491275 | G | A | rs752081336  | V | M | 936 | 0.036 | B | 1.000 | T | 0.156 | 0.104 | Benign   | 2.4   | 8.5    | dbGaP_PopFreq |                      |
| 63491284 | G | C | rs755034079  | E | Q | 939 | 0.382 | B | 0.278 | T | 0.553 | 0.161 | Benign   | n/a   | 0.8    | ExAC          |                      |
| 63491290 | T | C | rs375020796  | W | R | 941 | 0.999 | D | 0.000 | D | 0.977 | 0.816 | Damaging | n/a   | 7.7    | GoESP         |                      |
| 63491291 | G | A | rs2030363266 | W | X | 941 |       |   | n/a   |   | 0.912 | n/a   |          | n/a   | 0.7    | GnomAD        |                      |
| 63491292 | G | T | rs1202055050 | W | C | 941 | 0.999 | D | 0.000 | D | 0.951 | 0.686 | Damaging | n/a   | 0.7    | GnomAD        |                      |
| 63491293 | A | G | rs1290388486 | N | D | 942 | 0.000 | B | 0.795 | T | 0.131 | 0.091 | Benign   | n/a   | 54.6   | Korea1K       |                      |
| 63491294 | A | G | rs2030363936 | N | S | 942 | 0.000 | B | 0.471 | T | 0.119 | 0.059 | Benign   | n/a   | 0.7    | GnomAD        |                      |
| 63491297 | A | G | rs777955033  | K | R | 943 | 0.492 | P | 0.193 | T | 0.205 | 0.103 | Benign   | 0.8   | 0.8    | ExAC          |                      |
| 63491298 | G | C | rs1456982290 | K | N | 943 | 0.724 | P | 0.277 | T | 0.585 | 0.099 | Benign   | 0.4   | 0.4    | GnomAD_exomes |                      |
| 63491305 | C | G | rs1397259349 | L | V | 946 | 0.198 | B | 0.034 | D | 0.575 | 0.227 |          | 0.4   | 6.0    | TOMMO         |                      |
| 63491308 | G | A | rs201076681  | E | K | 947 | 0.902 | P | 0.025 | D | 0.733 | 0.331 | Damaging | 1.6   | 7.7    | GoESP         |                      |
| 63491314 | C | T | rs779881202  | P | S | 949 | 0.999 | D | 0.001 | D | 0.856 | 0.576 | Damaging | 0.4   | 0.8    | ExAC          |                      |
| 63491320 | G | T | rs776223808  | D | Y | 951 | 0.992 | D | 0.001 | D | 0.821 | 0.594 | Damaging | 1.2   | 171.0  | KOREAN        |                      |

Table S1

|          |   |   |              |   |   |     |       |   |       |   |       |       |          |      |       |               |                        |
|----------|---|---|--------------|---|---|-----|-------|---|-------|---|-------|-------|----------|------|-------|---------------|------------------------|
| 63491323 | G | A | rs987787902  | G | R | 952 | 0.993 | D | 0.002 | D | 0.695 | 0.396 | Damaging | n/a  | 3.0   | TOPMED        |                        |
| 63491326 | C | T | rs772888815  | R | W | 953 | 1.000 | D | 0.000 | D | 0.918 | 0.504 | Damaging | 1.2  | 54.6  | Korea1K       | Uncertain_significance |
| 63491333 | T | G | rs1599152117 | V | G | 955 | 0.999 | D | 0.000 | D | 0.605 | 0.812 | Damaging | n/a  | 764.0 | Korea1K       |                        |
| 63491336 | T | G | rs1599152130 | V | G | 956 | 1.000 | D | 0.013 | D | 0.743 | 0.796 | Damaging | n/a  | 164.0 | Korea1K       |                        |
| 63491338 | T | C | rs759966983  | C | R | 957 | 0.999 | D | 0.000 | D | 0.991 | 0.851 | Damaging | 0.4  | 0.8   | ExAC          |                        |
| 63491339 | G | C | rs767594429  | C | S | 957 | 0.994 | D | 0.000 | D | 0.936 | 0.698 | Damaging | 0.4  | 9.4   | dbGaP_PopFreq |                        |
| 63491344 | G | A | rs756159839  | A | T | 959 | 0.810 | P | 0.026 | D | 0.900 | 0.366 | Damaging | 0.8  | 5.7   | dbGaP_PopFreq |                        |
| 63491345 | C | A | rs764275894  | A | D | 959 | 0.890 | P | 0.002 | D | 0.939 | 0.707 | Damaging | 0.8  | 5.1   | dbGaP_PopFreq |                        |
| 63491348 | C | T | rs1420430019 | S | L | 960 | 0.999 | D | 0.001 | D | 0.960 | 0.808 | Damaging | 1.6  | 1.6   | GnomAD_exomes |                        |
| 63491350 | G | C | rs779833433  | A | P | 961 | 0.999 | D | 0.002 | D | 0.927 | 0.817 | Damaging | 2.8  | 8.5   | dbGaP_PopFreq | Uncertain_significance |
| 63491365 | A | G | rs746934582  | N | D | 966 | 0.997 | D | 0.458 | T | 0.802 | 0.253 |          | 0.4  | 0.8   | ExAC          |                        |
| 63491368 | G | A | rs937878555  | G | S | 967 | 0.967 | D | 0.503 | T | 0.184 | 0.148 | Benign   | 1.6  | 101.0 | TOMMO         |                        |
| 63491374 | G | T | rs913463914  | D | Y | 969 | 0.999 | D | 0.001 | D | 0.992 | 0.742 | Damaging | 0.4  | 2.1   | GnomAD        |                        |
| 63491378 | T | G | rs2030374256 | F | C | 970 | 1.000 | D | 0.002 | D | 0.933 | 0.848 | Damaging | n/a  | 0.4   | TOPMED        |                        |
| 63491380 | C | T | rs769406157  | R | W | 971 | 1.000 | D | 0.000 | D | 0.981 | 0.579 | Damaging | 2.4  | 2.5   | ExAC          |                        |
| 63491381 | G | A | rs554004241  | R | Q | 971 | 0.998 | D | 0.002 | D | 0.975 | 0.614 | Damaging | 8.0  | 39.9  | 1000Genomes   |                        |
| 63493437 | A | G | rs2030513571 | I | V | 972 | 0.970 | D | 0.052 | T | 0.707 | 0.271 |          | n/a  | 3.1   | dbGaP_PopFreq |                        |
| 63493438 | T | C | rs2030513778 | I | T | 972 | 0.999 | D | 0.001 | D | 0.972 | 0.835 | Damaging | n/a  | 0.4   | TOPMED        |                        |
| 63493444 | A | G | rs375442845  | Q | R | 974 | 0.995 | D | 0.232 | T | 0.957 | 0.609 | Damaging | n/a  | 7.7   | GoESP         |                        |
| 63493446 | T | G | rs1318768216 | C | G | 975 | 1.000 | D | 0.000 | D | 0.979 | 0.778 | Damaging | 0.4  | 0.4   | GnomAD_exomes |                        |
| 63493447 | G | A | rs1346738730 | C | Y | 975 | 1.000 | D | 0.000 | D | 0.965 | 0.669 | Damaging | 0.4  | 0.4   | GnomAD_exomes |                        |
| 63493449 | A | C | rs1599154131 | T | P | 976 | 0.999 | D | 0.002 | D | 0.697 | 0.740 | Damaging | n/a  | 491.0 | Korea1K       |                        |
| 63493453 | C | T | rs1439040577 | T | I | 977 | 0.006 | B | 0.175 | T | 0.296 | 0.117 | Benign   | n/a  | 1.1   | TOPMED        |                        |
| 63493455 | G | A | rs141750591  | V | M | 978 | 0.993 | D | 0.090 | T | 0.761 | 0.383 |          | 25.5 | 80.9  | TWINSUK       | Uncertain_significance |
| 63493462 | T | C | rs2030516614 | L | S | 980 | 0.266 | B | 0.031 | D | 0.374 | 0.219 | Benign   | n/a  | 3.1   | dbGaP_PopFreq |                        |
| 63493466 | G | C | rs868230881  | E | D | 981 | 0.003 | B | 0.480 | T | 0.125 | 0.082 | Benign   | n/a  | 463.0 | Qatari        |                        |
| 63493476 | G | A | rs2030518300 | V | M | 985 | 0.568 | P | 0.004 | D | 0.347 | 0.148 | Benign   | n/a  | 0.7   | GnomAD        |                        |
| 63493479 | G | C | rs1218838386 | A | P | 986 | 0.492 | P | 0.014 | D | 0.794 | 0.247 | Damaging | n/a  | 328.0 | Korea1K       |                        |
| 63493482 | C | T | rs1285477249 | H | Y | 987 | 0.999 | D | 0.002 | D | 0.971 | 0.689 | Damaging | 1.2  | 4.3   | dbGaP_PopFreq |                        |
| 63493486 | A | G | rs1315238107 | H | R | 988 | 0.792 | P | 0.003 | D | 0.970 | 0.773 | Damaging | n/a  | 0.4   | TOPMED        |                        |
| 63493488 | G | A | rs752685131  | E | K | 989 | 1.000 | D | 0.003 | D | 0.970 | 0.682 | Damaging | 1.2  | 1.2   | GnomAD_exomes |                        |
| 63493492 | T | G | rs1468555557 | M | R | 990 | 0.601 | P | 0.001 | D | 0.967 | 0.809 | Damaging | 0.4  | 0.4   | GnomAD_exomes |                        |
| 63493493 | G | A | rs1227030637 | M | I | 990 | 0.005 | B | 0.029 | D | 0.667 | 0.316 |          | n/a  | 0.8   | TOPMED        |                        |
| 63493494 | G | A | rs756019276  | G | S | 991 | 1.000 | D | 0.005 | D | 0.977 | 0.863 | Damaging | 0.4  | 0.8   | ExAC          |                        |
| 63493497 | C | G | rs1244440863 | H | D | 992 | 1.000 | D | 0.002 | D | 0.967 | 0.806 | Damaging | 1.2  | 1.2   | GnomAD_exomes |                        |
| 63493498 | A | G | rs771384705  | H | R | 992 | 0.999 | D | 0.002 | D | 0.989 | 0.808 | Damaging | n/a  | 187.0 | MGP           |                        |
| 63493500 | A | G | rs753450698  | I | V | 993 | 0.003 | B | 0.312 | T | 0.140 | 0.039 | Benign   | n/a  | 1.4   | GnomAD        |                        |
| 63493503 | C | T | rs2030522022 | Q | X | 994 |       |   | n/a   |   | 0.962 | n/a   |          | n/a  | 0.4   | TOPMED        |                        |
| 63493504 | A | G | rs2030522217 | Q | R | 994 | 0.995 | D | 0.007 | D | 0.928 | 0.753 | Damaging | n/a  | 0.4   | TOPMED        |                        |
| 63493506 | T | C | rs778562737  | Y | H | 995 | 0.999 | D | 0.020 | D | 0.977 | 0.836 | Damaging | 0.4  | 0.8   | ExAC          |                        |
| 63493510 | T | C | rs2030522633 | F | S | 996 | 0.997 | D | 0.035 | D | 0.902 | 0.528 | Damaging | n/a  | 0.7   | GnomAD        |                        |

Table S1

|          |   |   |              |   |   |      |              |          |              |          |              |              |                 |             |               |               |                        |
|----------|---|---|--------------|---|---|------|--------------|----------|--------------|----------|--------------|--------------|-----------------|-------------|---------------|---------------|------------------------|
| 63493512 | A | G | rs745486055  | M | V | 997  | 0.341        | B        | 0.020        | D        | 0.477        | 0.242        | Benign          | n/a         | 1.1           | TOPMED        |                        |
| 63493514 | G | A | rs1395070641 | M | I | 997  | 0.341        | B        | 0.151        | T        | 0.414        | 0.129        | Benign          | 0.4         | 0.4           | GnomAD_exomes |                        |
| 63493515 | C | A | rs772433710  | Q | K | 998  | <b>0.991</b> | <b>D</b> | 0.106        | T        | <b>0.903</b> | 0.552        | Damaging        | 0.4         | 0.8           | ExAC          |                        |
| 63493519 | A | G | rs1325658187 | Y | C | 999  | <b>1.000</b> | <b>D</b> | <b>0.010</b> | <b>D</b> | <b>0.956</b> | 0.737        | Damaging        | 0.4         | 0.4           | GnomAD_exomes |                        |
| 63493531 | C | T | rs377280373  | P | L | 1003 | <b>0.909</b> | <b>D</b> | <b>0.001</b> | <b>D</b> | <b>0.996</b> | 0.719        | Damaging        | 2.4         | 7.7           | GoESP         |                        |
| 63493543 | G | A | rs747362596  | R | K | 1007 | <b>0.999</b> | <b>D</b> | 0.060        | T        | <b>0.810</b> | 0.315        |                 | 0.4         | 0.8           | ExAC          |                        |
| 63493549 | G | T | rs769272334  | G | V | 1009 | <b>0.994</b> | <b>D</b> | <b>0.001</b> | <b>D</b> | <b>0.926</b> | <b>0.701</b> | <b>Damaging</b> | 0.4         | 2.9           | GnomAD        |                        |
| 63493552 | C | G | rs1740970700 | A | G | 1010 | <b>0.992</b> | <b>D</b> | <b>0.005</b> | <b>D</b> | <b>0.811</b> | <b>0.506</b> | <b>Damaging</b> | n/a         | 0.7           | GnomAD        |                        |
| 63493555 | A | C | rs1599154319 | N | T | 1011 | <b>1.000</b> | <b>D</b> | <b>0.021</b> | <b>D</b> | <b>0.893</b> | <b>0.618</b> | <b>Damaging</b> | n/a         | <b>218.0</b>  | Korea1K       |                        |
| 63493557 | C | T | rs2030526216 | P | S | 1012 | <b>0.999</b> | <b>D</b> | <b>0.023</b> | <b>D</b> | <b>0.924</b> | <b>0.607</b> | <b>Damaging</b> | n/a         | 6.0           | TOMMO         |                        |
| 63493560 | G | A | rs571848794  | G | S | 1013 | <b>1.000</b> | <b>D</b> | <b>0.005</b> | <b>D</b> | <b>0.968</b> | <b>0.731</b> | <b>Damaging</b> | 4.4         | <b>187.0</b>  | MGP           |                        |
| 63493561 | G | C | rs540734174  | G | A | 1013 | <b>0.999</b> | <b>D</b> | 0.117        | T        | <b>0.906</b> | 0.471        |                 | 0.8         | 20.0          | 1000Genomes   | Uncertain_significance |
| 63493566 | C | T | rs2030527371 | H | Y | 1015 | <b>0.999</b> | <b>D</b> | <b>0.001</b> | <b>D</b> | <b>0.969</b> | <b>0.694</b> | <b>Damaging</b> | n/a         | 0.4           | TOPMED        |                        |
| 63493567 | A | G | rs773600140  | H | R | 1015 | <b>0.999</b> | <b>D</b> | <b>0.016</b> | <b>D</b> | <b>0.974</b> | <b>0.766</b> | <b>Damaging</b> | 1.6         | 3.2           | TOPMED        |                        |
| 63493568 | T | A | rs144751624  | H | Q | 1015 | <b>0.999</b> | <b>D</b> | <b>0.003</b> | <b>D</b> | <b>0.952</b> | 0.462        | <b>Damaging</b> | <b>18.7</b> | <b>126.0</b>  | PAGE_STUDY    |                        |
| 63493570 | A | G | rs2030528115 | E | G | 1016 | <b>1.000</b> | <b>D</b> | <b>0.000</b> | <b>D</b> | <b>0.971</b> | <b>0.859</b> | <b>Damaging</b> | n/a         | 0.4           | TOPMED        |                        |
| 63493572 | G | A | rs1471502216 | A | T | 1017 | <b>0.999</b> | <b>D</b> | <b>0.001</b> | <b>D</b> | <b>0.963</b> | <b>0.661</b> | <b>Damaging</b> | 0.4         | 0.4           | GnomAD_exomes |                        |
| 63493575 | A | G | rs2030528735 | I | V | 1018 | 0.215        | B        | 1.000        | T        | 0.173        | 0.134        | Benign          | n/a         | 0.7           | GnomAD        |                        |
| 63493576 | T | C | rs4976       | I | T | 1018 | <b>0.988</b> | <b>D</b> | <b>0.002</b> | <b>D</b> | <b>0.831</b> | <b>0.622</b> | <b>Damaging</b> | <b>36.2</b> | <b>651.0</b>  | HapMap        | Uncertain_significance |
| 63493578 | G | A | rs1418273122 | G | R | 1019 | <b>1.000</b> | <b>D</b> | <b>0.001</b> | <b>D</b> | <b>0.986</b> | <b>0.734</b> | <b>Damaging</b> | 0.4         | 0.4           | GnomAD_exomes |                        |
| 63493582 | A | G | rs1200211350 | D | G | 1020 | <b>1.000</b> | <b>D</b> | <b>0.004</b> | <b>D</b> | <b>0.989</b> | <b>0.774</b> | <b>Damaging</b> | n/a         | <b>22.4</b>   | dbGaP_PopFreq |                        |
| 63493584 | G | A | rs764129854  | V | M | 1021 | <b>0.977</b> | <b>D</b> | <b>0.009</b> | <b>D</b> | <b>0.854</b> | 0.376        | <b>Damaging</b> | 3.2         | 3.2           | GnomAD_exomes | Uncertain_significance |
| 63493593 | C | T | rs753672462  | L | F | 1024 | <b>1.000</b> | <b>D</b> | <b>0.002</b> | <b>D</b> | <b>0.912</b> | 0.458        | <b>Damaging</b> | 1.6         | 1.6           | GnomAD_exomes |                        |
| 63493596 | T | G | rs1489092015 | S | A | 1025 | <b>0.997</b> | <b>D</b> | <b>0.000</b> | <b>D</b> | <b>0.753</b> | 0.490        | <b>Damaging</b> | n/a         | 0.7           | GnomAD        |                        |
| 63493599 | G | A | rs377550847  | V | M | 1026 | <b>0.998</b> | <b>D</b> | <b>0.002</b> | <b>D</b> | <b>0.903</b> | <b>0.545</b> | <b>Damaging</b> | 1.2         | 7.7           | GoESP         |                        |
| 63493600 | T | C | rs1372691116 | V | A | 1026 | <b>0.886</b> | <b>P</b> | 0.103        | T        | <b>0.937</b> | 0.357        | Benign          | 0.4         | 0.4           | GnomAD_exomes |                        |
| 63493603 | C | G | rs2030532137 | S | C | 1027 | <b>0.980</b> | <b>D</b> | <b>0.008</b> | <b>D</b> | <b>0.601</b> | 0.445        | <b>Damaging</b> | n/a         | 0.7           | GnomAD        |                        |
| 63493606 | C | T | rs778331848  | T | M | 1028 | <b>1.000</b> | <b>D</b> | <b>0.000</b> | <b>D</b> | <b>0.947</b> | <b>0.700</b> | <b>Damaging</b> | 2.4         | 2.9           | GnomAD        |                        |
| 63493608 | C | T | rs758105347  | P | S | 1029 | <b>0.999</b> | <b>D</b> | <b>0.012</b> | <b>D</b> | <b>0.805</b> | <b>0.594</b> | <b>Damaging</b> | 0.4         | 0.8           | ExAC          |                        |
| 63493613 | G | T | rs374679629  | K | N | 1030 | <b>0.561</b> | <b>P</b> | <b>0.024</b> | <b>D</b> | 0.491        | 0.132        | Benign          | 1.2         | 7.7           | GoESP         |                        |
| 63493621 | A | C | rs747442787  | H | P | 1033 | 0.437        | B        | 0.104        | T        | <b>0.548</b> | 0.232        | Benign          | 0.8         | 0.8           | ExAC          |                        |
| 63493631 | C | A | rs142947404  | N | K | 1036 | 0.041        | B        | 0.053        | T        | 0.208        | 0.063        | Benign          | <b>80.3</b> | <b>2310.0</b> | Qatari        | Uncertain_significance |
| 63493633 | T | C | rs1258035065 | L | P | 1037 | <b>1.000</b> | <b>D</b> | <b>0.000</b> | <b>D</b> | <b>0.976</b> | <b>0.802</b> | <b>Damaging</b> | 0.4         | 0.4           | GnomAD_exomes |                        |
| 63493639 | G | A | rs1368193999 | S | N | 1039 | 0.011        | B        | 0.285        | T        | 0.108        | 0.065        | Benign          | n/a         | 1.1           | TOPMED        |                        |
| 63493640 | C | A | rs2030536211 | S | R | 1039 | 0.034        | B        | 0.134        | T        | 0.372        | 0.133        | Benign          | n/a         | 0.4           | TOPMED        |                        |
| 63493642 | G | C | rs749362077  | S | T | 1040 | 0.000        | B        | 0.610        | T        | 0.194        | 0.064        | Benign          | 0.4         | 0.8           | ExAC          |                        |
| 63493646 | G | T | rs771342124  | E | D | 1041 | 0.000        | B        | 0.238        | T        | 0.125        | 0.045        | Benign          | n/a         | 1.1           | TOPMED        |                        |
| 63493650 | G | A | rs2030536853 | G | S | 1043 | 0.001        | B        | 0.366        | T        | 0.137        | 0.026        | Benign          | n/a         | 0.7           | GnomAD        |                        |
| 63493651 | G | T | rs1599154510 | G | V | 1043 | 0.002        | B        | 0.118        | T        | 0.207        | 0.038        | Benign          | n/a         | 0.7           | GnomAD        |                        |
| 63493656 | G | C | rs140980792  | D | H | 1045 | 0.001        | B        | 0.563        | T        | 0.103        | 0.026        | Benign          | 4.8         | <b>183.0</b>  | PRJEB37766    |                        |
| 63493658 | C | A | rs200011052  | D | E | 1045 | 0.000        | B        | 0.553        | T        | 0.057        | 0.032        | Benign          | 0.8         | <b>20.0</b>   | 1000Genomes   |                        |

Table S1

|          |   |   |              |   |   |      |              |          |              |          |              |              |                 |             |              |               |                        |
|----------|---|---|--------------|---|---|------|--------------|----------|--------------|----------|--------------|--------------|-----------------|-------------|--------------|---------------|------------------------|
| 63493659 | G | A | rs761601299  | E | K | 1046 | <b>0.996</b> | <b>D</b> | <b>0.100</b> | <b>T</b> | <b>0.871</b> | 0.435        |                 | 0.4         | 0.9          | ExAC          |                        |
| 63493928 | A | G | rs1313627969 | D | G | 1048 | <b>0.509</b> | <b>P</b> | 0.053        | T        | <b>0.772</b> | 0.420        | Benign          | 0.8         | <b>13.2</b>  | TOPMED        |                        |
| 63493930 | A | G | rs765835019  | I | V | 1049 | <b>0.984</b> | <b>D</b> | <b>0.090</b> | <b>T</b> | <b>0.581</b> | 0.219        |                 | 0.8         | 0.8          | ExAC          |                        |
| 63493933 | A | G | rs751226904  | N | D | 1050 | <b>0.998</b> | <b>D</b> | <b>0.030</b> | <b>D</b> | <b>0.967</b> | <b>0.524</b> | <b>Damaging</b> | 0.4         | 0.8          | ExAC          |                        |
| 63493934 | A | G | rs935304784  | N | S | 1050 | <b>0.994</b> | <b>D</b> | <b>0.005</b> | <b>D</b> | <b>0.952</b> | <b>0.554</b> | <b>Damaging</b> | n/a         | 1.5          | TOPMED        |                        |
| 63493939 | C | G | rs989584821  | L | V | 1052 | <b>0.988</b> | <b>D</b> | <b>0.003</b> | <b>D</b> | <b>0.875</b> | 0.450        | <b>Damaging</b> | n/a         | 0.4          | TOPMED        |                        |
| 63493940 | T | C | rs1351048530 | L | P | 1052 | <b>1.000</b> | <b>D</b> | <b>0.000</b> | <b>D</b> | <b>0.992</b> | <b>0.813</b> | <b>Damaging</b> | 0.4         | 0.4          | GnomAD_exomes |                        |
| 63493948 | A | C | rs144926742  | M | L | 1055 | 0.065        | B        | 0.171        | T        | 0.467        | 0.132        | Benign          | 4.4         | <b>68.4</b>  | KOREAN        | Uncertain_significance |
| 63493949 | T | C | rs1568046795 | M | T | 1055 | <b>0.962</b> | <b>D</b> | 0.214        | T        | <b>0.534</b> | 0.209        |                 | 0.4         | 0.4          | GnomAD_exomes |                        |
| 63493950 | G | A | rs767184799  | M | I | 1055 | 0.017        | B        | 0.445        | T        | 0.281        | 0.058        | Benign          | 0.4         | 4.3          | GnomAD        |                        |
| 63493951 | G | A | rs569898686  | A | T | 1056 | <b>0.999</b> | <b>D</b> | <b>0.002</b> | <b>D</b> | <b>0.971</b> | <b>0.642</b> | <b>Damaging</b> | 0.4         | <b>20.0</b>  | 1000Genomes   |                        |
| 63493957 | G | A | rs1197014458 | D | N | 1058 | <b>0.830</b> | <b>P</b> | 0.069        | T        | <b>0.648</b> | 0.244        | Benign          | 0.4         | 0.4          | GnomAD_exomes |                        |
| 63493958 | A | G | rs1458584759 | D | G | 1058 | <b>0.916</b> | <b>D</b> | <b>0.013</b> | <b>D</b> | <b>0.739</b> | 0.395        | <b>Damaging</b> | n/a         | 0.7          | GnomAD        |                        |
| 63493963 | A | G | rs1458035301 | I | V | 1060 | 0.021        | B        | 0.584        | T        | 0.290        | 0.040        | Benign          | 1.6         | 1.6          | GnomAD_exomes |                        |
| 63493966 | G | A | rs773695336  | A | T | 1061 | 0.057        | B        | 0.058        | T        | <b>0.584</b> | 0.183        | Benign          | 6.0         | <b>476.0</b> | Vietn/amese   |                        |
| 63493969 | T | C | rs778802598  | F | L | 1062 | <b>0.998</b> | <b>D</b> | <b>0.029</b> | <b>D</b> | <b>0.939</b> | <b>0.645</b> | <b>Damaging</b> | 0.8         | 1.7          | ExAC          |                        |
| 63493976 | C | T | rs1384728709 | P | L | 1064 | <b>0.671</b> | <b>P</b> | <b>0.001</b> | <b>D</b> | <b>0.995</b> | <b>0.578</b> | <b>Damaging</b> | 1.2         | 1.5          | TOPMED        |                        |
| 63493984 | T | C | rs1342469069 | Y | H | 1067 | <b>0.990</b> | <b>D</b> | <b>0.000</b> | <b>D</b> | <b>0.857</b> | <b>0.580</b> | <b>Damaging</b> | n/a         | 2.8          | dbGaP_PopFreq |                        |
| 63493985 | A | G | rs1382876528 | Y | C | 1067 | <b>0.992</b> | <b>D</b> | <b>0.001</b> | <b>D</b> | <b>0.912</b> | 0.444        | <b>Damaging</b> | n/a         | 0.7          | GnomAD        |                        |
| 63493990 | G | A | rs147763588  | V | I | 1069 | 0.002        | B        | 0.860        | T        | 0.210        | 0.083        | Benign          | 2.4         | 7.7          | GoESP         |                        |
| 63493991 | T | C | rs1322398043 | V | A | 1069 | 0.422        | B        | 0.017        | D        | <b>0.556</b> | 0.294        |                 | n/a         | 0.7          | GnomAD        |                        |
| 63493993 | G | A | rs571910640  | D | N | 1070 | <b>1.000</b> | <b>D</b> | <b>0.002</b> | <b>D</b> | <b>0.983</b> | <b>0.597</b> | <b>Damaging</b> | 2.0         | <b>39.9</b>  | 1000Genomes   |                        |
| 63493996 | C | A | rs769531227  | Q | K | 1071 | 0.444        | B        | 0.516        | T        | <b>0.689</b> | 0.187        | Benign          | 0.4         | 0.8          | ExAC          |                        |
| 63494000 | G | A | rs773163752  | W | X | 1072 |              |          | n/a          |          | <b>0.908</b> | n/a          |                 | 0.4         | 0.8          | ExAC          |                        |
| 63494002 | C | T | rs762807750  | R | C | 1073 | <b>1.000</b> | <b>D</b> | <b>0.000</b> | <b>D</b> | <b>0.990</b> | <b>0.747</b> | <b>Damaging</b> | 1.6         | 3.1          | dbGaP_PopFreq |                        |
| 63494003 | G | A | rs141139841  | R | H | 1073 | <b>0.999</b> | <b>D</b> | <b>0.001</b> | <b>D</b> | <b>0.981</b> | <b>0.687</b> | <b>Damaging</b> | 0.8         | 7.7          | GoESP         |                        |
| 63494006 | G | A | rs1266895232 | W | X | 1074 |              |          | n/a          |          | <b>0.934</b> | n/a          |                 | 0.4         | 2.8          | dbGaP_PopFreq |                        |
| 63494011 | G | T | rs534480370  | V | L | 1076 | <b>0.995</b> | <b>D</b> | 0.068        | T        | <b>0.891</b> | 0.465        |                 | <b>17.1</b> | <b>171.0</b> | KOREAN        | Uncertain_significance |
| 63494017 | G | A | rs2030566841 | D | N | 1078 | 0.338        | B        | 0.194        | T        | 0.427        | 0.149        | Benign          | n/a         | <b>17.9</b>  | TOMMO         |                        |
| 63494018 | A | G | rs375039288  | D | G | 1078 | <b>0.946</b> | <b>D</b> | 0.099        | T        | <b>0.528</b> | 0.234        |                 | 2.4         | 7.7          | GoESP         |                        |
| 63494021 | G | A | rs752369560  | G | E | 1079 | <b>0.856</b> | <b>P</b> | <b>0.012</b> | <b>D</b> | 0.499        | 0.351        | Benign          | 0.8         | 0.8          | ExAC          |                        |
| 63494023 | A | T | rs1472584106 | S | C | 1080 | <b>0.778</b> | <b>P</b> | <b>0.044</b> | <b>D</b> | 0.419        | 0.168        | Benign          | 0.4         | 0.4          | GnomAD_exomes |                        |
| 63494024 | G | A | rs1166034708 | S | N | 1080 | 0.111        | B        | 0.422        | T        | 0.330        | 0.055        | Benign          | 0.4         | 6.0          | TOMMO         |                        |
| 63494026 | A | G | rs761139845  | I | V | 1081 | 0.014        | B        | 0.393        | T        | 0.416        | 0.071        | Benign          | 0.8         | 1.7          | ExAC          |                        |
| 63494027 | T | A | rs2030568517 | I | N | 1081 | <b>0.994</b> | <b>D</b> | <b>0.001</b> | <b>D</b> | <b>0.803</b> | 0.351        | <b>Damaging</b> | n/a         | 0.4          | TOPMED        |                        |
| 63494035 | G | A | rs1455896148 | E | K | 1084 | 0.012        | B        | 0.218        | T        | 0.313        | 0.070        | Benign          | 0.8         | <b>11.1</b>  | dbGaP_PopFreq |                        |
| 63494037 | G | C | rs2030568933 | E | D | 1084 | 0.001        | B        | 0.588        | T        | 0.217        | 0.037        | Benign          | n/a         | 3.1          | dbGaP_PopFreq |                        |
| 63494049 | G | C | rs764489358  | Q | H | 1088 | <b>0.874</b> | <b>P</b> | 0.085        | T        | 0.470        | 0.279        | Benign          | n/a         | 0.8          | ExAC          |                        |
| 63494056 | T | C | rs2030569963 | W | R | 1091 | <b>1.000</b> | <b>D</b> | <b>0.001</b> | <b>D</b> | <b>0.989</b> | <b>0.724</b> | <b>Damaging</b> | n/a         | 0.7          | GnomAD        |                        |
| 63494057 | G | A | rs1411245193 | W | X | 1091 |              |          | n/a          |          | <b>0.937</b> | n/a          |                 | 0.4         | 0.4          | GnomAD_exomes |                        |
| 63494059 | A | G | rs2030570388 | S | G | 1092 | 0.082        | B        | 0.150        | T        | 0.461        | 0.113        | Benign          | n/a         | 0.7          | GnomAD        |                        |



Table S1

|          |   |   |              |   |   |      |       |   |       |   |       |       |          |      |       |               |                        |
|----------|---|---|--------------|---|---|------|-------|---|-------|---|-------|-------|----------|------|-------|---------------|------------------------|
| 63494065 | A | G | rs754412363  | R | G | 1094 | 1.000 | D | 0.002 | D | 0.962 | 0.738 | Damaging | 1.2  | 1.2   | GnomAD_exomes |                        |
| 63494382 | C | T | rs1568047250 | Q | X | 1098 |       |   | n/a   |   | 0.924 | n/a   |          | n/a  | 476.0 | Vietn/amese   |                        |
| 63494394 | C | A | rs145349565  | P | T | 1102 | 0.989 | D | 0.003 | D | 0.823 | 0.477 | Damaging | 68.9 | 377.0 | GoESP         | Benign/Likely_benign   |
| 63494397 | C | A | rs745776314  | P | T | 1103 | 1.000 | D | 0.000 | D | 0.902 | 0.698 | Damaging | 5.6  | 54.6  | Korea1K       |                        |
| 63494401 | T | C | rs1458829834 | V | A | 1104 | 0.040 | B | 0.114 | T | 0.220 | 0.072 | Benign   | n/a  | 0.7   | GnomAD        |                        |
| 63494408 | G | C | rs2030598589 | R | S | 1106 | 1.000 | D | 0.001 | D | 0.962 | 0.609 | Damaging | n/a  | 0.4   | TOPMED        |                        |
| 63494413 | A | G | rs2030599332 | Q | R | 1108 | 0.006 | B | 0.005 | D | 0.269 | 0.151 | Benign   | n/a  | 0.7   | GnomAD        |                        |
| 63494416 | G | T | rs768468260  | G | V | 1109 | 0.476 | P | 0.172 | T | 0.289 | 0.047 | Benign   | 0.4  | 0.8   | ExAC          |                        |
| 63494423 | T | A | rs1465879181 | F | L | 1111 | 0.996 | D | 0.040 | D | 0.964 | 0.537 | Damaging | 0.4  | 0.4   | GnomAD_exomes |                        |
| 63494425 | A | G | rs1568047328 | D | G | 1112 | 1.000 | D | 0.000 | D | 0.969 | 0.761 | Damaging | n/a  | 0.4   | TOPMED        | Uncertain_significance |
| 63494426 | C | G | rs762107963  | D | E | 1112 | 0.994 | D | 0.000 | D | 0.936 | 0.510 | Damaging | 0.8  | 0.8   | ExAC          |                        |
| 63494434 | C | A | rs565263717  | A | D | 1115 | 0.887 | P | 0.001 | D | 0.818 | 0.641 | Damaging | 0.8  | 20.0  | 1000Genomes   |                        |
| 63494443 | A | G | rs2030601838 | H | R | 1118 | 0.999 | D | 0.000 | D | 0.988 | 0.764 | Damaging | n/a  | 0.4   | TOPMED        |                        |
| 63494457 | G | A | rs373319603  | V | M | 1123 | 0.987 | D | 0.059 | T | 0.849 | 0.298 |          | 1.2  | 34.2  | KOREAN        |                        |
| 63494460 | C | A | rs1455545095 | P | T | 1124 | 1.000 | D | 0.005 | D | 0.937 | 0.671 | Damaging | 0.4  | 0.4   | GnomAD_exomes |                        |
| 63494466 | A | C | rs567659245  | I | L | 1126 | 0.022 | B | 0.150 | T | 0.396 | 0.064 | Benign   | 10.8 | 20.0  | 1000Genomes   |                        |
| 63494467 | T | G | rs2030603816 | I | S | 1126 | 0.974 | D | 0.060 | T | 0.809 | 0.432 |          | n/a  | 0.4   | TOPMED        |                        |
| 63496394 | G | T | rs1229959665 | R | S | 1127 | 0.999 | D | 0.070 | T | 0.926 | 0.480 |          | n/a  | 0.7   | GnomAD        |                        |
| 63496396 | A | G | rs1481913226 | Y | C | 1128 | 1.000 | D | 0.000 | D | 0.931 | 0.855 | Damaging | 0.4  | 0.4   | GnomAD_exomes |                        |
| 63496401 | G | A | rs575830312  | V | I | 1130 | 0.031 | B | 0.288 | T | 0.096 | 0.066 | Benign   | 2.4  | 20.0  | 1000Genomes   |                        |
| 63496402 | T | C | rs2030731929 | V | A | 1130 | 0.877 | P | 0.002 | D | 0.766 | 0.339 | Damaging | n/a  | 0.4   | TOPMED        |                        |
| 63496404 | A | G | rs2030732506 | S | G | 1131 | 0.091 | B | 0.079 | T | 0.291 | 0.226 | Benign   | n/a  | 0.8   | TOPMED        |                        |
| 63496405 | G | T | rs777258874  | S | I | 1131 | 0.998 | D | 0.002 | D | 0.810 | 0.657 | Damaging | 0.4  | 0.8   | ExAC          |                        |
| 63496409 | C | A | rs1308790992 | F | L | 1132 | 0.997 | D | 0.186 | T | 0.837 | 0.221 |          | 0.8  | 0.8   | GnomAD_exomes |                        |
| 63496416 | C | A | rs749711522  | Q | K | 1135 | 0.995 | D | 0.003 | D | 0.942 | 0.616 | Damaging | 4.0  | 4.3   | GnomAD        |                        |
| 63496417 | A | G | rs771232505  | Q | R | 1135 | 0.998 | D | 0.001 | D | 0.953 | 0.709 | Damaging | 0.4  | 1.1   | TOPMED        |                        |
| 63496422 | C | T | rs1341633213 | Q | X | 1137 |       |   | n/a   |   | 0.966 | n/a   |          | 0.4  | 0.4   | GnomAD_exomes |                        |
| 63496423 | A | G | rs1895643705 | Q | R | 1137 | 1.000 | D | 0.002 | D | 0.977 | 0.744 | Damaging | n/a  | 0.4   | TOPMED        |                        |
| 63496428 | C | T | rs1281978641 | H | Y | 1139 | 0.993 | D | 0.140 | T | 0.822 | 0.336 |          | 0.4  | 0.8   | TOPMED        |                        |
| 63496431 | G | A | rs1228691156 | E | K | 1140 | 0.011 | B | 0.847 | T | 0.236 | 0.150 | Benign   | 1.2  | 5.6   | dbGaP_PopFreq |                        |
| 63496443 | C | T | rs138675881  | Q | X | 1144 |       |   | n/a   |   | 0.933 | n/a   |          | n/a  | 30.8  | GoESP         |                        |
| 63496444 | A | C | rs775709106  | Q | P | 1144 | 0.063 | B | 0.155 | T | 0.463 | 0.134 | Benign   | 0.4  | 0.8   | ExAC          |                        |
| 63496447 | C | T | rs1444132860 | A | V | 1145 | 0.032 | B | 0.424 | T | 0.333 | 0.233 | Benign   | 0.4  | 0.4   | GnomAD_exomes |                        |
| 63496449 | G | C | rs2030736169 | A | P | 1146 | 0.998 | D | 0.003 | D | 0.866 | 0.557 | Damaging | n/a  | 0.4   | TOPMED        |                        |
| 63496455 | C | T | rs1246627721 | H | Y | 1148 | 0.900 | P | 0.044 | D | 0.566 | 0.181 | Damaging | n/a  | 0.7   | GnomAD        |                        |
| 63496459 | C | T | rs764430271  | T | M | 1149 | 0.439 | B | 0.133 | T | 0.295 | 0.089 | Benign   | 3.2  | 3.2   | GnomAD_exomes |                        |
| 63496462 | G | C | rs762872915  | G | A | 1150 | 0.736 | P | 0.043 | D | 0.620 | 0.383 | Damaging | 1.2  | 1.2   | GnomAD_exomes |                        |
| 63496465 | C | T | rs1460629643 | P | L | 1151 | 0.680 | P | 0.014 | D | 0.845 | 0.464 | Damaging | 0.4  | 0.7   | GnomAD        |                        |
| 63496472 | C | G | rs1167765854 | H | Q | 1153 | 0.899 | P | 0.003 | D | 0.670 | 0.360 | Damaging | 0.4  | 0.4   | GnomAD_exomes |                        |
| 63496477 | G | A | rs1319412351 | C | Y | 1155 | 0.999 | D | 0.000 | D | 0.969 | 0.707 | Damaging | n/a  | 1.9   | TOPMED        |                        |
| 63496479 | G | A | rs751557067  | D | N | 1156 | 0.998 | D | 0.093 | T | 0.891 | 0.429 |          | 0.4  | 0.8   | ExAC          |                        |

Table S1

|          |   |   |              |   |   |      |       |   |       |   |       |       |          |      |        |               |                      |
|----------|---|---|--------------|---|---|------|-------|---|-------|---|-------|-------|----------|------|--------|---------------|----------------------|
| 63496483 | T | C | rs1215104945 | I | T | 1157 | 0.999 | D | 0.002 | D | 0.945 | 0.797 | Damaging | n/a  | 2.4    | TOPMED        |                      |
| 63496487 | C | G | rs1381445771 | Y | X | 1158 |       |   | n/a   |   | 0.959 | n/a   |          | 0.4  | 1.1    | TOPMED        |                      |
| 63496492 | C | T | rs1435131111 | S | F | 1160 | 1.000 | D | 0.001 | D | 0.946 | 0.685 | Damaging | 0.4  | 0.4    | GnomAD_exomes |                      |
| 63496499 | G | C | rs2030740252 | E | D | 1162 | 0.006 | B | 0.156 | T | 0.250 | 0.175 | Benign   | n/a  | 0.4    | TOPMED        |                      |
| 63496500 | G | T | rs1299150514 | A | S | 1163 | 0.998 | D | 0.000 | D | 0.870 | 0.554 | Damaging | 1.2  | 1.2    | GnomAD_exomes |                      |
| 63496503 | G | A | rs145579007  | G | R | 1164 | 1.000 | D | 0.000 | D | 0.960 | 0.729 | Damaging | 10.0 | 100.0  | GoNL          |                      |
| 63496509 | C | T | rs777499791  | R | C | 1166 | 0.456 | P | 0.028 | D | 0.310 | 0.162 | Benign   | 1.2  | 1.7    | ExAC          |                      |
| 63496510 | G | A | rs201126192  | R | H | 1166 | 0.273 | B | 0.133 | T | 0.169 | 0.170 | Benign   | 8.0  | 20.0   | 1000Genomes   |                      |
| 63496512 | C | G | rs1227093005 | L | V | 1167 | 0.994 | D | 0.004 | D | 0.714 | 0.430 | Damaging | n/a  | 1.4    | GnomAD        |                      |
| 63496513 | T | C | rs2030743196 | L | P | 1167 | 1.000 | D | 0.001 | D | 0.965 | 0.832 | Damaging | n/a  | 0.4    | TOPMED        |                      |
| 63496515 | G | A | rs771285769  | A | T | 1168 | 0.439 | B | 0.282 | T | 0.198 | 0.104 | Benign   | 0.4  | 0.8    | ExAC          |                      |
| 63496516 | C | T | rs993733529  | A | V | 1168 | 0.647 | P | 0.159 | T | 0.216 | 0.094 | Benign   | n/a  | 0.7    | GnomAD        |                      |
| 63496799 | A | C | rs1599158062 | T | P | 1169 | 0.002 | B | 0.059 | T | 0.189 | 0.193 | Benign   | n/a  | 221.0  | Korea1K       |                      |
| 63496802 | G | A | rs747412511  | A | T | 1170 | 0.756 | P | 0.083 | T | 0.171 | 0.160 | Benign   | 0.8  | 1.4    | GnomAD        |                      |
| 63496803 | C | T | rs2030766252 | A | V | 1170 | 0.058 | B | 0.642 | T | 0.165 | 0.102 | Benign   | n/a  | 0.7    | GnomAD        |                      |
| 63496805 | A | C | rs776634959  | M | L | 1171 | 0.018 | B | 1.000 | T | 0.283 | 0.135 | Benign   | 0.4  | 0.8    | ExAC          |                      |
| 63496815 | G | A | rs1458534207 | G | D | 1174 | 1.000 | D | 0.000 | D | 0.869 | 0.922 | Damaging | n/a  | 1.1    | TOPMED        |                      |
| 63496825 | G | T | rs1385800001 | R | S | 1177 | 0.036 | B | 0.016 | D | 0.182 | 0.079 | Benign   | n/a  | 0.8    | TOPMED        |                      |
| 63496827 | C | T | rs538659872  | P | L | 1178 | 0.836 | P | 0.003 | D | 0.642 | 0.331 | Damaging | 1.6  | 54.6   | Korea1K       |                      |
| 63496831 | G | A | rs1406482731 | W | X | 1179 |       |   | n/a   |   | 0.906 | n/a   |          | 0.4  | 0.4    | GnomAD_exomes |                      |
| 63496832 | C | G | rs767177049  | P | A | 1180 | 0.995 | D | 0.019 | D | 0.632 | 0.322 | Damaging | 2.0  | 4.5    | dbGaP_PopFreq |                      |
| 63496833 | C | T | rs775501006  | P | L | 1180 | 1.000 | D | 0.011 | D | 0.742 | 0.391 | Damaging | 5.6  | 6.4    | TOPMED        |                      |
| 63496841 | A | G | rs376826294  | M | V | 1183 | 0.634 | P | 0.025 | D | 0.786 | 0.424 | Damaging | n/a  | 7.7    | GoESP         |                      |
| 63496842 | T | C | rs753388395  | M | T | 1183 | 0.957 | D | 0.001 | D | 0.919 | 0.595 | Damaging | 0.4  | 0.8    | ExAC          |                      |
| 63496843 | G | A | rs756739847  | M | I | 1183 | 0.634 | P | 0.062 | T | 0.788 | 0.276 | Benign   | 0.4  | 0.8    | ExAC          |                      |
| 63496844 | C | T | rs2030770130 | Q | X | 1184 |       |   | n/a   |   | 0.773 | n/a   |          | n/a  | 0.4    | TOPMED        |                      |
| 63496852 | C | G | rs764893306  | I | M | 1186 | 0.059 | B | 0.415 | T | 0.255 | 0.043 | Benign   | 0.8  | 1.7    | ExAC          |                      |
| 63496854 | C | T | rs12709442   | T | M | 1187 | 1.000 | D | 0.001 | D | 0.788 | 0.408 | Damaging | 76.0 | 1060.0 | PharmGKB      | Benign/Likely_benign |
| 63496860 | A | G | rs1210452594 | Q | R | 1189 | 0.995 | D | 0.072 | T | 0.502 | 0.349 |          | n/a  | 0.8    | TOPMED        |                      |
| 63496862 | C | T | rs1295931503 | P | S | 1190 | 0.028 | B | 0.799 | T | 0.115 | 0.020 | Benign   | n/a  | 1.9    | TOPMED        |                      |
| 63496863 | C | T | rs1264163829 | P | L | 1190 | 0.663 | P | 0.329 | T | 0.366 | 0.122 | Benign   | n/a  | 0.7    | GnomAD        |                      |
| 63496868 | A | G | rs2030771924 | M | V | 1192 | 0.654 | P | 0.075 | T | 0.542 | 0.334 | Benign   | n/a  | 6.0    | TOMMO         |                      |
| 63496872 | G | A | rs780228220  | S | N | 1193 | 0.996 | D | 0.123 | T | 0.616 | 0.217 |          | 0.4  | 1.1    | TOPMED        |                      |
| 63496874 | G | A | rs755506668  | A | T | 1194 | 0.898 | P | 0.152 | T | 0.326 | 0.280 | Benign   | 2.8  | 22.3   | Estonian      |                      |
| 63496875 | C | A | rs777388821  | A | D | 1194 | 0.982 | D | 0.003 | D | 0.877 | 0.456 | Damaging | n/a  | 25.9   | ALSPAC        |                      |
| 63496877 | T | C | rs1343107612 | S | P | 1195 | 0.092 | B | 0.083 | T | 0.376 | 0.152 | Benign   | 0.4  | 0.4    | GnomAD_exomes |                      |
| 63496878 | C | T | rs748284095  | S | L | 1195 | 0.004 | B | 0.108 | T | 0.214 | 0.170 | Benign   | 2.4  | 3.4    | ExAC          |                      |
| 63496880 | G | A | rs773596097  | A | T | 1196 | 0.433 | B | 0.021 | D | 0.540 | 0.258 |          | 0.4  | 0.8    | ExAC          |                      |
| 63496883 | A | G | rs201870045  | M | V | 1197 | 0.016 | B | 0.099 | T | 0.314 | 0.118 | Benign   | 1.2  | 1.2    | GnomAD_exomes |                      |
| 63496897 | C | A | rs775204602  | F | L | 1201 | 0.998 | D | 0.003 | D | 0.958 | 0.493 | Damaging | 0.4  | 0.9    | ExAC          |                      |
| 63496902 | C | T | rs369760270  | P | L | 1203 | 1.000 | D | 0.014 | D | 0.920 | 0.567 | Damaging | 1.6  | 101.0  | TOMMO         |                      |

Table S1

|          |   |   |              |   |   |      |       |   |       |   |       |       |          |      |       |               |                        |
|----------|---|---|--------------|---|---|------|-------|---|-------|---|-------|-------|----------|------|-------|---------------|------------------------|
| 63496910 | G | T | rs2030775874 | D | Y | 1206 | 0.871 | P | 0.006 | D | 0.601 | 0.299 | Damaging | n/a  | 0.4   | TOPMED        |                        |
| 63496911 | A | C | rs1291258688 | D | A | 1206 | 0.164 | B | 0.203 | T | 0.425 | 0.158 | Benign   | n/a  | 0.8   | TOPMED        |                        |
| 63496919 | C | T | rs1353694784 | R | C | 1209 | 0.414 | B | 0.050 | T | 0.283 | 0.155 | Benign   | 0.8  | 2.8   | dbGaP_PopFreq |                        |
| 63496920 | G | A | rs538166970  | R | H | 1209 | 0.240 | B | 0.116 | T | 0.176 | 0.183 | Benign   | 1.6  | 39.9  | 1000Genomes   |                        |
| 63496923 | C | T | rs12720742   | T | M | 1210 | 0.441 | B | 0.078 | T | 0.361 | 0.131 | Benign   | 32.1 | 426.0 | HapMap        | Likely_benign          |
| 63496925 | G | A | rs766053859  | E | K | 1211 | 0.116 | B | 0.085 | T | 0.467 | 0.267 | Benign   | 0.4  | 0.9   | ExAC          |                        |
| 63496926 | A | T | rs1568049110 | E | V | 1211 | 0.880 | P | 0.001 | D | 0.621 | 0.436 | Damaging | 0.4  | 0.4   | GnomAD_exomes |                        |
| 63496928 | A | G | rs996589954  | N | D | 1212 | 0.999 | D | 0.003 | D | 0.888 | 0.595 | Damaging | 0.8  | 1.4   | GnomAD        |                        |
| 63496929 | A | C | rs574717474  | N | T | 1212 | 1.000 | D | 0.002 | D | 0.890 | 0.532 | Damaging | 2.4  | 20.0  | 1000Genomes   |                        |
| 63496931 | G | A | rs149590791  | E | K | 1213 | 0.001 | B | 0.945 | T | 0.107 | 0.101 | Benign   | 0.4  | 7.7   | GoESP         |                        |
| 63496932 | A | C | rs2030780027 | E | A | 1213 | 0.001 | B | 0.673 | T | 0.150 | 0.064 | Benign   | n/a  | 0.7   | GnomAD        |                        |
| 63496935 | T | C | rs1451027689 | L | P | 1214 | 0.058 | B | 0.056 | T | 0.282 | 0.173 | Benign   | n/a  | 1.1   | TOPMED        |                        |
| 63496938 | A | G | rs757974064  | H | R | 1215 | 0.040 | B | 0.275 | T | 0.186 | 0.117 | Benign   | n/a  | 187.0 | MGP           |                        |
| 63496939 | T | G | rs144312383  | H | Q | 1215 | 0.003 | B | 0.452 | T | 0.154 | 0.049 | Benign   | n/a  | 109.0 | Korea1K       |                        |
| 63496940 | G | A | rs2030781426 | G | R | 1216 | 0.699 | P | 0.028 | D | 0.276 | 0.207 | Benign   | n/a  | 0.4   | TOPMED        |                        |
| 63496943 | G | T | rs534095139  | E | X | 1217 |       |   | n/a   |   | 0.896 | n/a   |          | 0.8  | 20.0  | 1000Genomes   |                        |
| 63496945 | G | T | rs1248102885 | E | D | 1217 | 0.048 | B | 0.218 | T | 0.207 | 0.084 | Benign   | 0.4  | 0.4   | GnomAD_exomes |                        |
| 63496946 | A | C | rs2030782089 | K | Q | 1218 | 0.001 | B | 0.305 | T | 0.151 | 0.024 | Benign   | n/a  | 0.4   | TOPMED        |                        |
| 63496947 | A | G | rs2030782285 | K | R | 1218 | 0.023 | B | 0.335 | T | 0.188 | 0.030 | Benign   | n/a  | 0.4   | TOPMED        |                        |
| 63496950 | T | C | rs140941300  | L | P | 1219 | 0.989 | D | 0.052 | T | 0.837 | 0.325 |          | 47.2 | 463.0 | Qatari        | Uncertain_significance |
| 63496952 | G | A | rs1418538736 | G | S | 1220 | 1.000 | D | 0.015 | D | 0.918 | 0.828 | Damaging | 0.4  | 0.4   | GnomAD_exomes |                        |
| 63496958 | C | T | rs144888208  | P | S | 1222 | 0.999 | D | 0.137 | T | 0.761 | 0.285 |          | 0.4  | 7.7   | GoESP         |                        |
| 63496959 | C | T | rs779175881  | P | L | 1222 | 1.000 | D | 0.009 | D | 0.835 | 0.481 | Damaging | 2.4  | 5.6   | ExAC          |                        |
| 63496964 | T | C | rs776554544  | Y | H | 1224 | 0.962 | D | 0.036 | D | 0.547 | 0.261 | Damaging | 0.4  | 1.0   | ExAC          |                        |
| 63496968 | A | C | rs761685671  | N | T | 1225 | 0.001 | B | 0.322 | T | 0.222 | 0.027 | Benign   | 0.4  | 1.0   | ExAC          |                        |
| 63496972 | G | C | rs769710002  | W | C | 1226 | 1.000 | D | 0.043 | D | 0.534 | 0.424 | Damaging | 0.4  | 1.0   | ExAC          |                        |
| 63496973 | A | G | rs772778762  | T | A | 1227 | 0.000 | B | 0.443 | T | 0.163 | 0.046 | Benign   | 0.8  | 1.0   | ExAC          |                        |
| 63496974 | C | T | rs762495578  | T | M | 1227 | 0.010 | B | 0.058 | T | 0.196 | 0.090 | Benign   | 4.5  | 34.3  | KOREAN        |                        |
| 63496980 | A | G | rs753269825  | N | S | 1229 | 0.000 | B | 0.491 | T | 0.166 | 0.041 | Benign   | 0.4  | 1.1   | ExAC          |                        |
| 63496983 | C | A | rs756742824  | S | Y | 1230 | 0.372 | B | 0.003 | D | 0.437 | 0.094 | Benign   | 2.9  | 2.9   | GnomAD_exomes |                        |
| 63496985 | G | A | rs959741765  | A | T | 1231 | 0.183 | B | 0.236 | T | 0.175 | 0.074 | Benign   | 0.4  | 35.8  | TOMMO         |                        |
| 63497139 | C | T | rs750545791  | R | C | 1232 | 0.265 | B | 0.049 | D | 0.288 | 0.097 | Benign   | 0.9  | 1.1   | TOPMED        |                        |
| 63497140 | G | A | rs372282664  | R | H | 1232 | 0.001 | B | 0.123 | T | 0.130 | 0.050 | Benign   | 6.9  | 27.0  | TWINSUK       |                        |
| 63497143 | C | T | rs1474601688 | S | L | 1233 | 0.001 | B | 0.341 | T | 0.064 | 0.022 | Benign   | n/a  | 6.0   | TOMMO         |                        |
| 63497152 | C | T | rs751737727  | P | L | 1236 | 0.001 | B | 0.011 | D | 0.043 | 0.056 | Benign   | 0.4  | 1.1   | ExAC          |                        |
| 63497161 | A | G | rs777561376  | D | G | 1239 | 0.000 | B | 0.493 | T | 0.041 | 0.013 | Benign   | 0.9  | 2.2   | ExAC          |                        |
| 63497162 | C | G | rs749019292  | D | E | 1239 | 0.000 | B | 1.000 | T | 0.031 | 0.035 | Benign   | 0.4  | 1.1   | ExAC          |                        |
| 63497166 | G | A | rs367916721  | G | S | 1241 | 0.003 | B | 0.399 | T | 0.069 | 0.012 | Benign   | 38.1 | 101.0 | dbGaP_PopFreq | Uncertain_significance |
| 63497169 | C | T | rs1226490350 | R | C | 1242 | 0.446 | B | 0.003 | D | 0.278 | 0.175 | Benign   | 0.9  | 1.4   | GnomAD        |                        |
| 63497170 | G | A | rs781198085  | R | H | 1242 | 0.374 | B | 0.024 | D | 0.116 | 0.032 | Benign   | 3.5  | 51.9  | ALSPAC        |                        |
| 63497172 | G | A | rs372416620  | V | I | 1243 | 0.279 | B | 0.087 | T | 0.117 | 0.047 | Benign   | 5.6  | 13.0  | dbGaP_PopFreq |                        |



Table S1

|          |   |   |              |   |   |      |              |          |              |          |              |       |                 |              |               |               |                        |
|----------|---|---|--------------|---|---|------|--------------|----------|--------------|----------|--------------|-------|-----------------|--------------|---------------|---------------|------------------------|
| 63497178 | T | C | rs531181910  | F | L | 1245 | 0.039        | B        | 0.067        | T        | 0.433        | 0.155 | Benign          | 0.4          | <b>20.0</b>   | 1000Genomes   |                        |
| 63497185 | G | T | rs2030812434 | G | V | 1247 | <b>0.976</b> | <b>D</b> | <b>0.007</b> | <b>D</b> | <b>0.525</b> | 0.464 | <b>Damaging</b> | n/a          | 0.4           | TOPMED        |                        |
| 63497191 | A | C | rs777124668  | D | A | 1249 | 0.001        | B        | 0.776        | T        | 0.056        | 0.122 | Benign          | 0.4          | 7.1           | dbGaP_PopFreq |                        |
| 63497193 | C | G | rs1193002337 | L | V | 1250 | 0.034        | B        | 0.454        | T        | 0.062        | 0.009 | Benign          | 0.4          | 0.4           | GnomAD_exomes |                        |
| 63497200 | C | T | rs762056936  | A | V | 1252 | 0.007        | B        | 0.143        | T        | 0.113        | 0.021 | Benign          | 0.4          | 5.1           | dbGaP_PopFreq |                        |
| 63497211 | C | T | rs763049172  | R | C | 1256 | 0.353        | B        | 0.163        | T        | 0.345        | 0.133 | Benign          | <b>12.4</b>  | <b>31.4</b>   | ExAC          |                        |
| 63497212 | G | A | rs766377685  | R | H | 1256 | 0.001        | B        | 0.500        | T        | 0.201        | 0.069 | Benign          | 1.8          | <b>68.6</b>   | KOREAN        |                        |
| 63497214 | G | A | rs759857038  | V | M | 1257 | 0.016        | B        | 0.056        | T        | 0.091        | 0.049 | Benign          | 0.5          | <b>11.3</b>   | dbGaP_PopFreq | Uncertain_significance |
| 63497217 | G | A | rs1347084405 | G | S | 1258 | 0.341        | B        | 0.000        | D        | 0.461        | 0.146 | Benign          | 0.5          | 0.5           | GnomAD_exomes |                        |
| 63497218 | G | A | rs1434928128 | G | D | 1258 | <b>0.888</b> | <b>P</b> | <b>0.000</b> | <b>D</b> | <b>0.636</b> | 0.348 | <b>Damaging</b> | n/a          | 0.4           | TOPMED        |                        |
| 63497221 | A | C | rs756978461  | Q | P | 1259 | <b>0.497</b> | <b>P</b> | <b>0.018</b> | <b>D</b> | 0.467        | 0.362 | Benign          | 0.5          | 1.8           | ExAC          |                        |
| 63497242 | G | A | rs778929865  | G | D | 1266 | 0.075        | B        | 0.009        | D        | <b>0.564</b> | 0.215 |                 | 4.3          | <b>10.4</b>   | ExAC          |                        |
| 63497247 | G | A | rs757997489  | A | T | 1268 | 0.005        | B        | 0.289        | T        | 0.116        | 0.008 | Benign          | 4.4          | <b>14.2</b>   | ExAC          |                        |
| 63497254 | T | C | rs1179455074 | L | P | 1270 | 0.024        | B        | <b>0.002</b> | <b>D</b> | <b>0.772</b> | 0.351 |                 | n/a          | 0.8           | TOPMED        |                        |
| 63497256 | G | A | rs780690514  | V | I | 1271 | 0.003        | B        | 0.489        | T        | 0.131        | 0.020 | Benign          | 0.6          | 3.4           | ExAC          |                        |
| 63497259 | G | A | rs1425238764 | A | T | 1272 | 0.029        | B        | 0.393        | T        | 0.101        | 0.108 | Benign          | n/a          | 0.8           | TOPMED        |                        |
| 63497260 | C | G | rs770016471  | A | G | 1272 | <b>0.530</b> | <b>P</b> | <b>0.005</b> | <b>D</b> | 0.102        | 0.154 | Benign          | n/a          | 1.4           | GnomAD        |                        |
| 63497280 | C | T | rs568401628  | R | W | 1279 | <b>0.451</b> | <b>P</b> | <b>0.001</b> | <b>D</b> | 0.338        | 0.204 | Benign          | 4.5          | <b>20.0</b>   | 1000Genomes   |                        |
| 63497281 | G | A | rs4980       | R | Q | 1279 | 0.002        | B        | <b>0.019</b> | <b>D</b> | 0.098        | 0.051 | Benign          | <b>410.2</b> | <b>3240.0</b> | Qatari        | Benign/Likely_benign   |
| 63497287 | T | C | rs1393052928 | F | S | 1281 | 0.004        | B        | <b>0.045</b> | <b>D</b> | 0.195        | 0.143 | Benign          | 0.7          | 0.7           | GnomAD_exomes |                        |
| 63497292 | A | G | rs1268051765 | I | V | 1283 | 0.011        | B        | 0.465        | T        | 0.148        | 0.074 | Benign          | n/a          | 0.8           | TOPMED        |                        |
| 63497295 | C | T | rs375527470  | R | C | 1284 | 0.353        | B        | <b>0.002</b> | <b>D</b> | 0.426        | 0.147 | Benign          | 5.4          | <b>33.5</b>   | GnomAD        |                        |
| 63497296 | G | A | rs1333987335 | R | H | 1284 | 0.001        | B        | <b>0.037</b> | <b>D</b> | 0.243        | 0.067 | Benign          | 0.7          | 0.7           | GnomAD_exomes |                        |
| 63497301 | C | A | rs4364       | R | S | 1286 | 0.013        | B        | 0.247        | T        | 0.146        | 0.046 | Benign          | <b>733.3</b> | <b>6180.0</b> | PharmGKB      | Benign                 |
| 63497302 | G | A | rs767828019  | R | H | 1286 | 0.000        | B        | 0.584        | T        | 0.091        | 0.080 | Benign          | 17.0         | <b>17.0</b>   | GnomAD_exomes |                        |
| 63497307 | C | T | rs2030824754 | L | F | 1288 | 0.008        | B        | 0.119        | T        | 0.124        | 0.073 | Benign          | n/a          | 0.4           | TOPMED        |                        |
| 63497311 | A | G | rs1004296792 | H | R | 1289 | 0.000        | B        | 1.000        | T        | 0.056        | 0.070 | Benign          | n/a          | 1.1           | TOPMED        |                        |
| 63497313 | C | T | rs752812293  | R | W | 1290 | 0.000        | B        | <b>0.007</b> | <b>D</b> | 0.244        | 0.037 | Benign          | <b>41.7</b>  | <b>240.0</b>  | KOREAN        |                        |
| 63497314 | G | A | rs12720745   | R | Q | 1290 | 0.000        | B        | 0.456        | T        | 0.101        | 0.056 | Benign          | <b>146.4</b> | <b>691.0</b>  | TOPMED        |                        |
| 63497317 | A | C | rs2030826063 | H | P | 1291 | 0.000        | B        | 1.000        | T        | 0.111        | 0.029 | Benign          | n/a          | 0.4           | TOPMED        |                        |
| 63497322 | C | T | rs765069550  | H | Y | 1293 | 0.027        | B        | <b>0.013</b> | <b>D</b> | 0.111        | 0.021 | Benign          | 2.1          | <b>14.1</b>   | dbGaP_PopFreq | Uncertain_significance |
| 63497324 | C | A | rs1013454628 | H | Q | 1293 | 0.001        | B        | 0.058        | T        | 0.060        | 0.153 | Benign          | 0.7          | 4.0           | TOPMED        |                        |
| 63497325 | G | A | rs1422356094 | G | R | 1294 | 0.006        | B        | <b>0.004</b> | <b>D</b> | 0.377        | 0.127 | Benign          | 0.7          | <b>219.0</b>  | Korea1K       |                        |
| 63497326 | G | A | rs2030827530 | G | E | 1294 | 0.004        | B        | <b>0.005</b> | <b>D</b> | 0.178        | 0.048 | Benign          | n/a          | 0.7           | GnomAD        |                        |
| 63497329 | C | T | rs886053226  | P | L | 1295 | <b>0.466</b> | <b>P</b> | <b>0.012</b> | <b>D</b> | 0.384        | 0.130 | Benign          | n/a          | 0.8           | TOPMED        | Uncertain_significance |
| 63497332 | A | G | rs4981       | Q | R | 1296 | 0.001        | B        | 0.284        | T        | 0.121        | 0.125 | Benign          | 0.7          | 0.7           | GnomAD_exomes |                        |
| 63497337 | G | T | rs1024799181 | G | C | 1298 | 0.009        | B        | 0.111        | T        | 0.154        | 0.040 | Benign          | n/a          | 2.9           | GnomAD        |                        |
| 63497343 | G | A | rs751134637  | E | K | 1300 | 0.313        | B        | <b>0.027</b> | <b>D</b> | 0.352        | 0.220 | Benign          | 2.8          | <b>15.5</b>   | ExAC          |                        |
| 63497344 | A | G | rs1385347177 | E | G | 1300 | <b>0.725</b> | <b>P</b> | <b>0.010</b> | <b>D</b> | 0.317        | 0.263 | Benign          | 0.7          | <b>11.1</b>   | dbGaP_PopFreq |                        |
| 63497345 | G | C | rs1244045213 | E | D | 1300 | <b>0.453</b> | <b>P</b> | 0.067        | T        | 0.183        | 0.217 | Benign          | n/a          | 0.8           | TOPMED        |                        |

Table S2

Table S2. ACE mutations (including Loss-of-function damaging mutations)

| #                                                                   | Genetic position   | Amino acid position<br>(mature protein) | Polymorphism<br>or ( <i>reference</i> ) | PolyPhen-2<br>Score<br>(HVAR) | Minor Allele<br>Frequency,<br>per 100 000 | Blood<br>ACE,<br>% of M |
|---------------------------------------------------------------------|--------------------|-----------------------------------------|-----------------------------------------|-------------------------------|-------------------------------------------|-------------------------|
| 1                                                                   | p.Met1Leu          | SP                                      | rs1262893315                            | 0.000                         | 0.7                                       |                         |
| 2                                                                   | p.Met1Lys          | SP                                      | rs1005792910                            | 0.016                         | 0.7                                       |                         |
| 3                                                                   | p.Met1Thr          | SP                                      |                                         | 0.072                         |                                           |                         |
| 4                                                                   | p.Gly2Arg          | SP                                      | rs2049627089                            | <b>0.546</b>                  | 6.0                                       |                         |
| 5                                                                   | p.Gly2Glu          | SP                                      | rs558593002                             | 0.009                         | <b>50</b>                                 |                         |
| 6                                                                   | p.Gly2Val          | SP                                      |                                         | 0.055                         |                                           |                         |
| 7                                                                   | p.Ser5GlyfsX136    | <b>SP</b>                               | ( <i>I</i> )                            | <b>1.000</b>                  | 0.4                                       | Low                     |
| 8                                                                   | p.Ser5Leu          | SP                                      | rs1296229818                            | 0.263                         | 0.8                                       |                         |
| 9                                                                   | p.Ser5Trp          | SP                                      |                                         | 0.039                         |                                           |                         |
| 10                                                                  | p.Gly6Ala          | SP                                      | rs1267076673                            | 0.079                         | 0.7                                       |                         |
| 11                                                                  | p.Gly6Arg          | SP                                      | rs2049627437                            | 0.027                         | 0.8                                       |                         |
| 12                                                                  | p.Arg7Ser          | SP                                      | rs1285068027                            | 0.001                         | 0.7                                       |                         |
| 13                                                                  | p.Arg7Gly          | SP                                      |                                         | 0.001                         |                                           |                         |
| 14                                                                  | p.Arg7Leu          | SP                                      | rs1451926480                            | 0.001                         | 2.2                                       |                         |
| 15                                                                  | p.Arg8GlyfsX134    | <b>SP</b>                               | ( <i>I</i> )                            | <b>1.000</b>                  | 0.4                                       | Low                     |
| 16                                                                  | p.Arg8Leu          | SP                                      | rs2049627704                            | 0.001                         | 1.5                                       |                         |
| 17                                                                  | p.Arg8Trp          | SP                                      | rs1333116255                            | 0.001                         | 7.8                                       |                         |
| 18                                                                  | p.Gly9Arg          | SP                                      | rs1320210312                            | 0.004                         | 0.8                                       |                         |
| 19                                                                  | p.Gly9Trp          | SP                                      |                                         | 0.008                         |                                           |                         |
| 20                                                                  | p.Gly9Glu          | SP                                      | rs1223694748                            | 0.010                         | 3.0                                       |                         |
| 21                                                                  | p.Gly11Arg         | SP                                      | rs1405957884                            | 0.000                         | 0.4                                       |                         |
| 22                                                                  | p.Leu13Pro         | SP                                      | rs1187548350                            | 0.001                         | <b>96<sup>a</sup></b>                     |                         |
| 23                                                                  | p.Leu13_Leu14del   | <b>SP</b>                               | rs900084108;                            | <b>1.000</b>                  | 6.6                                       | Low                     |
| 24                                                                  | p.Leu13_Leu16del   | <b>SP</b>                               | rs751352152;                            | <b>1.000</b>                  | 0.8                                       | Low                     |
| 25                                                                  | p.Leu14Pro         | SP                                      | rs1207951348                            | 0.000                         | 0.4                                       |                         |
| 26                                                                  | p.Leu14_Leu22del   | SP                                      | rs90879686                              | <b>1.000</b>                  | 1.6                                       |                         |
| 27                                                                  | p.Pro15_16PL(2)ind | SP                                      | rs522691783                             | <b>1.000</b>                  | <b>10</b>                                 |                         |
| 28                                                                  | p.Pro15_Leu21del   | SP                                      | rs1245868974                            | <b>1.000</b>                  | 0.8                                       |                         |
| 29                                                                  | p.Pro15Ser         | SP                                      | rs1193133040                            | 0.001                         | 0.4                                       |                         |
| 30                                                                  | p.Pro15Leu         | SP                                      | rs1355518990                            | 0.000                         | 1.4                                       |                         |
| 31                                                                  | p.Pro15Gln         | SP                                      |                                         | 0.000                         |                                           |                         |
| 32                                                                  | p.Leu16_Pro23indel | <b>SP</b>                               | rs983649759;                            | <b>1.000</b>                  | <b>19</b>                                 | Low                     |
| 33                                                                  | p.Leu16Pro         | SP                                      | rs1352305726                            | 0.000                         | 3.3                                       |                         |
| 34                                                                  | p.Pro17Arg         | SP                                      | rs1441805434                            | 0.084                         | 0.9                                       |                         |
| 35                                                                  | p.Pro17Ser         | SP                                      | rs1599136248                            | 0.001                         | 0.4                                       |                         |
| 36                                                                  | p.Leu19_Pro24ins   | SP                                      | rs1437482955                            | <b>1.000</b>                  | 0.4                                       |                         |
| 37                                                                  | p.Leu19Pro         | SP                                      | rs1157043147                            | <b>0.694</b>                  | <b>13</b>                                 |                         |
| 38                                                                  | p.Leu20Serfs       | SP                                      | rs752411292                             | <b>1.000</b>                  | 1.6                                       |                         |
| 39                                                                  | p.Leu20Trp         | SP                                      | rs770640756                             | <b>0.624</b>                  | 1.4                                       |                         |
| 40                                                                  | p.Leu21Pro         | <b>SP</b>                               | ( <i>I</i> )                            | <b>0.797</b>                  | 0.4                                       | Low                     |
| 41                                                                  | p.Leu22Val         | SP                                      | rs2049629392                            | 0.068                         | 0.7                                       |                         |
| 42                                                                  | p.Pro23Ser         | SP                                      | rs1288779128                            | 0.020                         | 0.0                                       |                         |
| 43                                                                  | p.Pro23Ala         | SP                                      |                                         | 0.001                         |                                           |                         |
| 44                                                                  | p.Pro23Leu         | SP                                      | rs2049629518                            | 0.000                         | 0.4                                       |                         |
| 45                                                                  | p.Pro24Thr         | SP                                      | rs2049629589                            | 0.006                         | <b>72<sup>a</sup></b>                     |                         |
| 46                                                                  | p.Pro24del         | SP                                      | rs1440772953                            | <b>1.000</b>                  | 1.6                                       |                         |
| 47                                                                  | p.Gln25X           | SP                                      | rs1237545952                            | <b>1.000</b>                  | 1.6                                       |                         |
| 48                                                                  | p.Gln25Leu         | SP                                      | rs968327653                             | 0.000                         | 3.3                                       |                         |
| 49                                                                  | p.Ala27Gly         | SP                                      | rs774092241                             | 0.220                         | 8.8                                       |                         |
| 50                                                                  | p.Ala27Val         | SP                                      |                                         | 0.002                         |                                           |                         |
| 51                                                                  | p.Ala27Thr         | SP                                      | rs2049629805                            | 0.002                         | 0.8                                       |                         |
| Combined frequency of damaging ACE mutations MAF                    |                    |                                         |                                         |                               | <b>44.8</b>                               |                         |
| <b>I. Combined frequency of damaging mutations, % in population</b> |                    |                                         |                                         |                               | <b>0.05%</b>                              |                         |

Table S2

| #                                              | Genetic position  | Amino acid position<br>(mature protein) | Polymorphism<br>or ( <i>reference</i> ) | PolyPhen-2<br>Score<br>(HVAR) | Minor Allele<br>Frequency,<br>per 100 000 | Blood<br>ACE,<br>% of M |
|------------------------------------------------|-------------------|-----------------------------------------|-----------------------------------------|-------------------------------|-------------------------------------------|-------------------------|
| <b>II. Indels or stop codons in mature ACE</b> |                   |                                         |                                         |                               |                                           |                         |
| 1                                              | p.Leu34Profs      | L5Pfs                                   | rs1459096726                            |                               | 0.4                                       |                         |
| 2                                              | p.Gln51X          | Q22X                                    | rs1184203291                            |                               | 0.8                                       |                         |
| 3                                              | p.Ser52Glnfs      | S23Qfs                                  | rs1189819056                            |                               | 0.8                                       |                         |
| 4                                              | p.Gln59X          | Q30X                                    | rs868134438                             |                               | 0.8                                       |                         |
| 5                                              | p.Gln63X          | Q34X                                    | rs1278390159                            |                               | 0.8                                       |                         |
| 6                                              | p.Thr113Phefs     | T84Ffs                                  | rs1232118105                            |                               | 0.8                                       |                         |
| 7                                              | p.Glu116X         | Q87X                                    | rs747960753                             |                               | 1.3                                       |                         |
| 8                                              | p.Glu138X         | Q109X                                   | rs779422412                             |                               | 0.5                                       |                         |
| 9                                              | p.Arg149Leufs*53  | <b>R120Lfs</b>                          | rs778759606;                            |                               | 5.2                                       | Low                     |
| 10                                             | p.Tyr151del       | Y122del                                 | rs750908161                             |                               | 2.8                                       |                         |
| 11                                             | p.Ser179Serfs     | S150Sfs                                 | rs1441192851                            |                               | 0.4                                       |                         |
| 12                                             | p.Arg180X         | R151X                                   | rs779454500                             |                               | 0.8                                       |                         |
| 13                                             | p.Ser181Thrfs     | S152Tfs                                 | rs56397551                              |                               | 0.4                                       |                         |
| 14                                             | p.Trp189X         | W160X                                   | rs765401595                             |                               | 0.8                                       |                         |
| 15                                             | p.Glu190Argfs     | E161Rfs                                 | rs1402956277                            |                               | 0.4                                       |                         |
| 16                                             | p.Trp230X         | W201X                                   | rs757421466                             |                               | 1.6                                       |                         |
| 17                                             | p.Tyr244Profs     | Y215Pfs                                 | rs1214574142                            |                               | 3.2                                       |                         |
| 18                                             | p.Tyr251Phefs     | Y222Ffs                                 | rs1285331787                            |                               | 0.4                                       |                         |
| 19                                             | p.Arg265X         | <b>R236X</b>                            | rs138873311;                            |                               | 1.2                                       | Low                     |
| 20                                             | p.Tyr266X         | <b>Y237X</b>                            | (I,3)                                   |                               | 0.8                                       | Low                     |
| 21                                             | p.Asp268Glyfs     | D239Gfs                                 | rs1462640798                            |                               | 0.4                                       |                         |
| 22                                             | p.Arg269ins       | R240Yins                                | rs769080277                             |                               | 0.4                                       |                         |
| 23                                             | p.Arg274GlyfsX117 | <b>R245Gfs</b>                          | (4)                                     |                               | 0.4                                       | Low                     |
| 24                                             | p.Met285Valfs     | M256Vfs                                 | rs769816155                             |                               | 0.4                                       |                         |
| 25                                             | p.Phe300Serfs     | F271Sfs                                 | rs1387186484                            |                               | 0.4                                       |                         |
| 26                                             | p.Glu315X         | E286X                                   | rs760913528                             |                               | 0.4                                       |                         |
| 27                                             | p.Trp317X         | W288X                                   | rs1414333467                            |                               | 0.8                                       |                         |
| 28                                             | p.Ala326Glufs     | A297Efs                                 | rs1474671878                            |                               | 1.6                                       |                         |
| 29                                             | p.Glu328del       | <b>E299del</b>                          | (I)                                     |                               | 0.4                                       | Low                     |
| 30                                             | p.Met338Profs     | M309Pfs                                 | rs1196439789                            |                               | 0.4                                       |                         |
| 31                                             | p.Trp343X         | <b>W314X</b>                            | rs200225958;                            |                               | 0.8                                       | Low                     |
| 32                                             | p.Ser346GlufsX47  | <b>S317Efs</b>                          | rs1331062614;                           |                               | 0.4                                       | Low                     |
| 33                                             | p. Val358del      | V329del                                 | rs770842341                             |                               | 0.4                                       |                         |
| 34                                             | p.Cys359Valfs     | C330Vfs                                 | rs774181017                             |                               | 0.4                                       |                         |
| 35                                             | p.Gln396X         | Q367X                                   | rs76906391                              |                               | 0.4                                       |                         |
| 36                                             | p.Ala412Glyfs     | A383Gfs                                 | rs759192800                             |                               | 0.8                                       |                         |
| 37                                             | p.Glu432Profs     | E403Pfs                                 | rs1388420671                            |                               | 0.8                                       |                         |
| 38                                             | p.Lys436X         | K407X                                   | rs1427700343                            |                               | 1.0                                       |                         |
| 39                                             | p.Leu440ProfsX15  | <b>L411Pfs</b>                          | (I)                                     |                               | 0.4                                       | Low                     |
| 40                                             | p.Asp441fs        | <b>D412fs</b>                           | (2)                                     |                               | 0.4                                       | Low                     |
| 41                                             | p.Arg442Valfs     | R413Vfs                                 | rs1442562714                            |                               | 0.4                                       |                         |
| 42                                             | p.Leu452CysfsX    | <b>L423Cfs</b>                          | (4)                                     |                               | 0.4                                       | Low                     |
| 43                                             | p.Leu454X         | L425X                                   | rs1404415405                            |                               | 0.8                                       |                         |
| 44                                             | p.Ile462Asnfs     | I433Nfs                                 | rs140992429                             |                               | 0.8                                       |                         |
| 45                                             | p.Phe464Alafs     | F435Afs                                 | rs753436653                             |                               | 0.8                                       |                         |
| 46                                             | p.Trp474X         | W445X                                   | rs762742726                             |                               | 0.8                                       |                         |
| 47                                             | p.Val478Valfs     | V449fs                                  | rs1246593224                            |                               | 0.4                                       |                         |
| 48                                             | p.Pro485Leufs     | <b>P456fs</b>                           | (4)                                     |                               | 0.4                                       | Low                     |
| 49                                             | p.Ser486Profs     | S457Pfs                                 | rs758933315                             |                               | 2.4                                       |                         |
| 50                                             | p.Asp491Glufs     | D462Efs                                 | rs1257147672                            |                               | 0.4                                       |                         |
| 51                                             | p.Trp492X         | W463X                                   | rs1446625916                            |                               | 5.6                                       |                         |
| 52                                             | p.Arg496X         | <b>R467X</b>                            | (I)                                     |                               | 0.4                                       | Low                     |
| 53                                             | p.Gln500X         | Q471X                                   | rs2049747561                            |                               | 0.7                                       |                         |

Table S2

|     |                    |               |               |  |     |     |
|-----|--------------------|---------------|---------------|--|-----|-----|
| 54  | p.Gln500Argfs      | Q471Rfs       | rs748348196   |  | 2.4 |     |
| 55  | p.Pro505Del        | P576del       | rs766909364   |  | 7.6 |     |
| 56  | p.Arg508X          | R479X         | rs367797185;  |  | 3.2 | Low |
| 57  | c.1709+5G>T        | Abn. splicing | (I )          |  | 0.4 | Low |
| 58  | p.Gln537X          | Q508X         | rs1460738029  |  | 0.4 |     |
| 59  | p.537_538QF(3)     | Q508_F509ins_ | rs771053807   |  | 0.8 |     |
| 60  | p.Glu539X          | E510X         | rs1474365721  |  | 0.4 |     |
| 61  | p.Glu547X          | E518X         | rs1319348585  |  | 0.4 |     |
| 62  | p.Trp581X          | W552X         | rs768467806   |  | 0.4 |     |
| 63  | p.Trp581Glyfs      | W552Gfs       | (I )          |  | 0.4 | Low |
| 64  | p.Gln597X          | Q568X         | rs2029862662  |  | 0.4 |     |
| 65  | p.Lys601AsnfsX40   | K572Nfs       | (I,4 )        |  | 0.8 | Low |
| 66  | p.Trp609X          | W580X         | rs769466912   |  | 0.4 |     |
| 67  | p.Glu613X          | E584X         | rs935167896   |  | 3.0 |     |
| 68  | p.Gln616X          | Q587X         | rs762769560   |  | 0.4 |     |
| 69  | p.Gly622Alafs      | G593Afs       | rs772014965   |  | 26  |     |
| 70  | p.Trp628X          | W599X         | rs745879536   |  | 0.4 |     |
| 71  | p.Glu655X          | E526X         | rs1371611657  |  | 0.8 |     |
| 72  | p.Trp664X          | W635X         | rs1419177611  |  | 0.4 |     |
| 73  | p.Gln692X          | Q663X         | rs1260448350  |  | 0.4 |     |
| 74  | p.Tyr700X          | Y671X         | rs780199864   |  | 2.0 |     |
| 75  | p.Ile717Glnfs      | I688Qfs       | rs1219522144; |  | 0.8 | Low |
| 76  | p.Ile721LysfsX60   | I692Lfs       | (I )          |  | 0.4 | Low |
| 77  | p.Gln735X          | Q706X         | rs933390771   |  | 0.8 |     |
| 78  | p.Leu744Cysfs      | L715Cfs       | rs745767649   |  | 1.6 |     |
| 79  | p.Val756Argfs      | V727Rfs       | rs772172179   |  | 0.4 |     |
| 80  | p.Leu784Tyrfs      | L755Yfs       | rs1476011360  |  | 0.8 |     |
| 81  | p.Trp787X          | W758X         | rs775934699   |  | 0.8 |     |
| 82  | p.Glu788Argfs      | E759Rfs       | rs1482032796  |  | 0.8 |     |
| 83  | p.Arg791X          | R762X         | (I,4 )        |  | 0.4 | Low |
| 84  | p.Gln800X          | Q771X         | rs1568043111  |  | 0.4 |     |
| 85  | p.Tyr805X          | Y776X         | personal      |  | 0.4 | 49  |
| 86  | p.Asp820Metfs      | D791Mfs       | rs757544710   |  | 0.8 |     |
| 87  | p.Trp825X          | W796X         | rs2030184791  |  | 0.4 |     |
| 88  | p.Arg826Serfs      | R797Sfs       | rs1441728993  |  | 0.4 |     |
| 89  | p.Gln836X          | Q807X         | rs1405858837  |  | 1.2 |     |
| 90  | p.Gln843Argfs      | Q814Rfs       | rs956900465   |  | 0.4 |     |
| 91  | p.Gln867X          | Q838X         | rs1413766379  |  | 0.4 |     |
| 92  | p.Asn882Serfs      | N853Sfs       | rs146430617   |  | 0.4 |     |
| 93  | p.Tyr892X          | Y863X         | rs762809850   |  | 0.4 |     |
| 94  | p.Pro897fs         | P868fs        | (4 )          |  | 0.4 | Low |
| 95  | p.Trp941X          | W912X         | rs2030363266  |  | 0.8 |     |
| 96  | p.Ser944Glnfs      | S915Qfs       | rs1221050110  |  | 0.4 |     |
| 97  | p.Lys948_Pro949del | K919_P920del  | rs1292471704  |  | 0.4 |     |
| 98  | p.Glu954Glyfs      | E925Gfs       | rs78007237904 |  | 0.4 |     |
| 99  | p.Gln994X          | Q965X         | rs2030522022  |  | 0.7 |     |
| 100 | p.Pro1003_Ala1010  | P974_A981del  | rs746977732   |  | 0.4 |     |
| 101 | p.Leu1024fs        | L995fs        | (2 )          |  | 0.4 | Low |
| 102 | p.Ser1027Tyrfs     | S998Wfs       | rs1170915014  |  | 3.2 |     |
| 103 | p.Leu1032fs        | L1003fs       | (4 )          |  | 0.4 | Low |
| 104 | p.Glu1041_Ser1044  | Q1012del      | rs768525377   |  | 0.8 |     |
| 105 | p.Asp1058Tyrfs     | D1029Yfs      | (2 )          |  | 0.4 | Low |
| 106 | p.Pro1064Serfs     | P1035Sfs      | rs747724861   |  | 1.6 |     |
| 107 | p.Trp1072X         | W1053X        | rs773163752   |  | 0.8 |     |
| 108 | p.Trp1074X         | W1055X        | rs1266895232  |  | 0.8 |     |
| 109 | p.Trp1091X         | W1062X        | rs1411245193  |  | 0.4 |     |
| 110 | p. Gln1098X        | Q1069X        | rs1568047250  |  | 0.4 |     |
| 111 | p.Val1104fs        | P1075SPfs     | rs1447215842  |  | 0.4 |     |

Table S2

|                                                                      |                     |                           |                 |  |              |      |
|----------------------------------------------------------------------|---------------------|---------------------------|-----------------|--|--------------|------|
| 112                                                                  | p.Val1130GlnDel     | V1101Qfs                  | rs772585024     |  | 0.8          |      |
| 113                                                                  | p.Val1130Metfs      | V1101Mfs                  | rs762468887     |  | 2.4          |      |
| 114                                                                  | p.Ser1131Profs      | S1102Pfs                  | rs775933853     |  | 2.4          |      |
| 115                                                                  | p.Gln1137X          | Q1108X                    | rs1341633213    |  | 0.4          |      |
| 116                                                                  | p.Gln1144X          | Q1115X                    | rs1386775881    |  | 0.4          |      |
| 117                                                                  | p.Asp1156fs         | D1127Rfs                  | rs1403340480    |  | 0.4          |      |
| 118                                                                  | p.Tyr1158X          | Y1129X                    | rs1381445771    |  | 0.4          |      |
| 119                                                                  | p.Tyr1158fs         | Y1129Ifs                  | rs1367062284    |  | 0.8          |      |
| 120                                                                  | p.Lys1161fs         | K1132Qfs                  | rs34743858      |  | 0.4          |      |
| 121                                                                  | p.Gln1165X          | <b>Q1136X</b>             | (1,4 )          |  | 0.4          | Low  |
| 122                                                                  | p.Lys1172_Met1183   | <b>K1143_M1154del</b>     | (1 )            |  | 0.4          | Low  |
| 123                                                                  | C.3503+1G>A         | <b>Abn. splicing</b>      | (1 )            |  | 0.4          | Low  |
| 124                                                                  | p.Gly1174AlafsX12   | <b>G1145Afs</b>           | rs754265941;(1, |  | <b>47</b>    | Low  |
| 125                                                                  | p.Trp1179X          | W1150X                    | rs1406482731    |  | 0.4          |      |
| 126                                                                  | p.Gln1184X          | Q1155X                    | rs20307701130   |  | 0.4          |      |
| 127                                                                  | p.Glu1217X          | E1188X                    | rs534095139     |  | 0.8          |      |
| 128                                                                  | p.Trp1226X          | <b>W1197X<sup>b</sup></b> | rs769710002;    |  | 0.4          | 1300 |
| 129                                                                  | p.Ser1238Pfs        | <b>S1209Pfs</b>           | (2 )            |  | 0.4          | Low  |
| 130                                                                  | p.1248_1249LD(3)    | L1252_D1253ins            | rs780845846     |  | 0.4          |      |
| 131                                                                  | p.Gln1253X          | <b>Q1224X<sup>b</sup></b> | rs1174820268;   |  | 0.4          | 1200 |
| 132                                                                  | p.Leu1276Ser1277del | L1247_S1248del            | rs1367232864    |  | 0.6          |      |
| 133                                                                  | p.Gln1296X          | Q1267X                    | rs1162756119    |  | 0.4          |      |
|                                                                      |                     |                           | Sum of D        |  | <b>186.2</b> |      |
| <b>II. Combined frequency of damaging mutations, % in population</b> |                     |                           |                 |  | <b>0.19%</b> |      |

Table S2

| #                                                       | Genetic position | Amino acid position<br>(mature protein) | Polymorphism<br>or ( <i>reference</i> ) | PolyPhen-2<br>Score<br>(HVAR) | Minor Allele<br>Frequency,<br>per 100 000 | Blood<br>ACE,<br>% of M |
|---------------------------------------------------------|------------------|-----------------------------------------|-----------------------------------------|-------------------------------|-------------------------------------------|-------------------------|
| <b>III. All missense mutations (including damaging)</b> |                  |                                         |                                         |                               |                                           |                         |
| 1                                                       | p.Leu30Ser       | L1S                                     | rs1196105733                            | 0.374                         | 0.8                                       |                         |
| 2                                                       | p.Leu30Phe       | L1F                                     | rs1450600177                            | <b>0.855</b>                  | 0.7                                       |                         |
| 3                                                       | p.Asp31Glu       | D2E                                     | rs1200169472                            | 0.000                         | 0.4                                       |                         |
| 4                                                       | p.Pro32Thr       | P3T                                     | rs1395554180                            | 0.002                         | 1.1                                       |                         |
| 5                                                       | p.Gly33Arg       | G4R                                     | rs1363496774                            | <b>0.890</b>                  | 0.4                                       |                         |
| 6                                                       | p.Pro36Thr       | P7T                                     | rs761292178                             | <b>0.853</b>                  | 0.8                                       |                         |
| 7                                                       | p.Pro36Leu       | P7L                                     | rs769008922                             | <b>0.914</b>                  | 1.9                                       |                         |
| 8                                                       | p.Asn38Ser       | N9S                                     | rs1327600431                            | 0.001                         | 0.9                                       |                         |
| 9                                                       | p.Ala41Thr       | A12T                                    | rs926499615                             | 0.016                         | 0.9                                       |                         |
| 10                                                      | p.Asp42Asn       | D13N                                    | rs376354160                             | 0.029                         | 3.6                                       |                         |
| 11                                                      | p.Asp42Glu       | D13E                                    | rs1188476738                            | 0.018                         | 0.8                                       |                         |
| 12                                                      | p.Glu43Ala       | E14A                                    | rs1310330954                            | <b>0.889</b>                  | 0.8                                       |                         |
| 13                                                      | p.Ala44Thr       | A15T                                    | rs765456530                             | 0.045                         | 0.4                                       |                         |
| 14                                                      | p.Gly45Arg       | G16R                                    | rs750712925                             | <b>0.999</b>                  | 2.9                                       |                         |
| 15                                                      | p.Gly45Glu       | G16E                                    | rs763151946                             | <b>0.470</b>                  | 0.8                                       |                         |
| 16                                                      | p.Ala46Thr       | A17T                                    | rs1156835126                            | <b>0.879</b>                  | 3.3                                       |                         |
| 17                                                      | p.Glu47Arg       | Q18R                                    | rs767353320                             | 0.003                         | 4.3                                       |                         |
| 18                                                      | p.Phe49Leu       | F20L                                    | rs752407759                             | <b>0.858</b>                  | 6.4                                       |                         |
| 19                                                      | p.Ala50Thr       | A21T                                    | rs1412092470                            | 0.020                         | 0.8                                       |                         |
| 20                                                      | p.Ser52Asn       | S23N                                    | rs777523880                             | 0.027                         | 0.8                                       |                         |
| 21                                                      | p.Ser52Arg       | S23R                                    | rs368265670                             | 0.316                         | <b>65</b>                                 |                         |
| 22                                                      | p.Ser52Gly       | S23G                                    | rs756108093                             | 0.049                         | 0.8                                       |                         |
| 23                                                      | p.Tyr53Cys       | Y24C                                    | rs991760634                             | <b>0.950</b>                  | 0.4                                       |                         |
| 24                                                      | p.Asn54Ser       | N25S                                    | rs756763242                             | 0.173                         | 6.0                                       |                         |
| 25                                                      | p.Ser55Pro       | S26P                                    | rs2049631560                            | 0.047                         | 0.4                                       |                         |
| 26                                                      | p.Ser55Phe       | S26F                                    | rs886053219                             | 0.261                         | 0.8                                       |                         |
| 27                                                      | p.Ser56Asn       | S27N                                    | rs1854521219                            | <b>0.503</b>                  | 0.4                                       |                         |
| 28                                                      | p.Ala57Thr       | A28T                                    | rs2049632676                            | 0.191                         | 0.8                                       |                         |
| 29                                                      | p.Leu61Gln       | L32Q                                    | rs74552589                              | 0.046                         | 0.4                                       |                         |
| 30                                                      | p.Phe62Ser       | F33S                                    | rs1345758653                            | 0.011                         | 0.8                                       |                         |
| 31                                                      | p.Gln63His       | Q34H                                    | rs780601919                             | <b>0.618</b>                  | 0.8                                       |                         |
| 32                                                      | p.Ser64Gly       | S35G                                    | rs747292160                             | 0.104                         | 0.4                                       |                         |
| 33                                                      | p.Val65Met       | V36M                                    | rs776943620                             | 0.061                         | 2.2                                       |                         |
| 34                                                      | p.Ala66Thr       | A37T                                    | rs1450630173                            | 0.004                         | 1.1                                       |                         |
| 35                                                      | p.Ala67Gly       | A38G                                    | rs887280103                             | <b>0.974</b>                  | 1.9                                       |                         |
| 36                                                      | p.Ser68Ile       | S39I                                    | rs1331734032                            | <b>0.920</b>                  | 0.4                                       |                         |
| 37                                                      | p.Ser68Arg       | S39R                                    | rs1170287329                            | <b>0.446</b>                  | 4.7                                       |                         |
| 38                                                      | p.His71Tyr       | H42Y                                    | rs773257897                             | 0.000                         | 0.8                                       |                         |
| 39                                                      | p.Asp72Tyr       | D43Y                                    | rs752559637                             | <b>0.692</b>                  | 5.9                                       |                         |
| 40                                                      | p.Asn74Asp       | N45D                                    | rs1331766879                            | 0.242                         | 0.7                                       |                         |
| 41                                                      | p.Asn74Ser       | N45S                                    | rs1235548322                            | <b>0.489</b>                  | 0.8                                       |                         |
| 42                                                      | p.Ile75Asn       | I46N                                    | rs2049633221                            | <b>0.974</b>                  | <b>30</b>                                 |                         |
| 43                                                      | p.Ile75Phe       | I46F                                    | rs375602836                             | <b>0.944</b>                  | 1.5                                       |                         |
| 44                                                      | p.Thr76Ser       | T47S                                    | rs1465491488                            | 0.102                         | 0.7                                       |                         |
| 45                                                      | p.Ala77Thr       | A48T                                    | rs867626302                             | 0.009                         | 2.2                                       |                         |
| 46                                                      | p.Glu78Gln       | E49Q                                    | rs778615098                             | 0.236                         | 3.7                                       |                         |
| 47                                                      | p.Arg82Leu       | R53L                                    | rs997125723                             | 0.002                         | 0.4                                       |                         |
| 48                                                      | p.Gln83Lys       | Q54K                                    | rs1344103805                            | 0.032                         | 0.8                                       |                         |
| 49                                                      | p.Glu84Lys       | E55K                                    | rs1345164089                            | <b>0.758</b>                  | 0.8                                       |                         |
| 50                                                      | p.Glu85Lys       | E56K                                    | rs150382846                             | 0.173                         | 4.1                                       |                         |
| 51                                                      | p.Ala87Ser       | A58S                                    | rs1440389747                            | 0.022                         | 0.4                                       |                         |
| 52                                                      | p.Leu88Val       | L59V                                    | rs762976911                             | 0.077                         | 0.4                                       |                         |
| 53                                                      | p.Leu89His       | L60H                                    | rs765857431                             | <b>0.914</b>                  | 2.9                                       |                         |

Table S2

|     |             |       |              |       |     |  |
|-----|-------------|-------|--------------|-------|-----|--|
| 54  | p.Ser90Gly  | S61G  | rs751050925  | 0.016 | 4.1 |  |
| 55  | p.Ser90Asn  | S61N  | rs1221928144 | 0.002 | 0.8 |  |
| 56  | p.Gln91Glu  | Q62E  | rs1414717313 | 0.122 | 0.7 |  |
| 57  | p.Glu92Gly  | E63G  | rs767149889  | 0.598 | 1.1 |  |
| 58  | p.Phe93Val  | F64V  | rs122622664  | 0.917 | 0.4 |  |
| 59  | p.Ala94Val  | A65V  | rs753078890  | 0.024 | 4.1 |  |
| 60  | p.Ala96Pro  | A67P  | rs756407366  | 0.332 | 0.4 |  |
| 61  | p.Ala96Val  | A67V  | rs1193074438 | 0.003 | 0.4 |  |
| 62  | p.Trp97Ser  | W68S  | rs2049646473 | 0.086 | 0.4 |  |
| 63  | p.Trp97Cys  | W68C  | rs1471264963 | 0.617 | 0.4 |  |
| 64  | p.Gln99Glu  | Q70E  | rs749853877  | 0.002 | 5.7 |  |
| 65  | p.Lys100Glu | K71E  | rs1407660027 | 0.079 | 0.4 |  |
| 66  | p.Ala101Thr | A72T  | rs757757495  | 0.357 | 1.6 |  |
| 67  | p.Glu103Asp | E74D  | rs1439594637 | 0.017 | 0.4 |  |
| 68  | p.Tyr105Cys | Y76C  | rs1220739409 | 0.769 | 3.2 |  |
| 69  | p.Glu106Gly | E77G  | rs1279075366 | 0.001 | 0.7 |  |
| 70  | p.Pro107Arg | P78R  | rs772201818  | 0.383 | 2.9 |  |
| 71  | p.Glu110His | E81H  | rs780364983  | 0.077 | 0.4 |  |
| 72  | p.Thr113Met | T84M  | rs1271259475 | 0.174 | 0.4 |  |
| 73  | p.Asp114His | D85H  | rs1568035450 | 0.987 | 0.4 |  |
| 74  | p.Pro115Arg | P86R  | rs1334067073 | 0.520 | 0.4 |  |
| 75  | p.Pro115Ser | P86S  | rs1188044442 | 0.053 | 0.8 |  |
| 76  | p.Arg118Cys | R89C  | rs1439803774 | 0.989 | 0.4 |  |
| 77  | p.Arg118Leu | R89L  | rs773121528  | 0.376 | 1.6 |  |
| 78  | p.Ile120Phe | I91F  | rs762839851  | 0.354 | 0.9 |  |
| 79  | p.Ile120Thr | I91T  | rs770863321  | 0.203 | 0.4 |  |
| 80  | p.Ile121Val | I92V  | rs539067889  | 0.050 | 2.6 |  |
| 81  | p.Ile121Thr | I92T  | rs1416423148 | 0.922 | 0.4 |  |
| 82  | p.Gly122Arg | G93R  | rs1170830801 | 0.030 | 4.7 |  |
| 83  | p.Ala123Asp | A94D  | rs2049648175 | 0.012 | 0.4 |  |
| 84  | p.Val124Ala | V95A  | rs2049648205 | 0.217 | 0.7 |  |
| 85  | p.Arg125Cys | R96C  | rs759033270  | 0.801 | 3.4 |  |
| 86  | p.Arg125Pro | R96P  | rs904130482  | 0.667 | 0.4 |  |
| 87  | p.Thr126Iso | T97I  | rs936814960  | 0.048 | 0.5 |  |
| 88  | p.Gly128Ala | G99A  | rs767085054  | 0.833 | 2.3 |  |
| 89  | p.Ala135Thr | A106T | rs752416873  | 0.018 | 1.0 |  |
| 90  | p.Lys136Glu | K107E | rs2049648986 | 0.109 | 0.8 |  |
| 91  | p.Lys136Thr | K107T | rs760310248  | 0.634 | 1.5 |  |
| 92  | p.Arg137Gly | R108G | rs764488884  | 0.747 | 4.0 |  |
| 93  | p.Arg137Trp | R108W |              | 1.000 |     |  |
| 94  | p.Arg137Gln | R108Q | rs556087296  | 0.051 | 2.7 |  |
| 95  | p.Gln139Glu | Q110E | rs750481872  | 0.071 | 1.6 |  |
| 96  | p.Asn141Lys | N112K | rs746469812  | 0.839 | 3.0 |  |
| 97  | p.Ser145Ile | S116I | rs768306471  | 0.994 | 0.4 |  |
| 98  | p.Ser145Arg | S116R | rs776279706  | 0.938 | 0.9 |  |
| 99  | p.Asn146Ile | N117I | rs761366166  | 0.148 | 0.8 |  |
| 100 | p.Met147Val | M118V | rs201716509  | 0.916 | 0.8 |  |
| 101 | p.Met147Thr | M118T | rs773425152  | 0.996 | 0.8 |  |
| 102 | p.Met147Arg | M118R |              | 1.000 |     |  |
| 103 | p.Ser148Asn | S119N | rs147057007  | 0.006 | 0.4 |  |
| 104 | p.Arg149Leu | R120L | rs766945182  | 0.146 | 6.4 |  |
| 105 | p.Ile150Met | I121M | rs1370591668 | 0.870 | 0.4 |  |
| 106 | p.Ser152Thr | S123T | rs75214560   | 0.258 | 0.4 |  |
| 107 | p.Thr153Ala | T124A | rs767705427  | 0.059 | 1.2 |  |
| 108 | p.Thr153Ile | T124I | rs201277497  | 0.817 | 1.2 |  |
| 109 | p.Ala154Thr | A125T | rs13306087   | 0.330 | 84  |  |
| 110 | p.Ala154Val | A125V | rs569318874  | 0.486 | 0.4 |  |
| 111 | p.Lys155Asn | K126N | rs143320537  | 0.727 | 32  |  |



Table S2

|     |              |         |              |       |     |  |
|-----|--------------|---------|--------------|-------|-----|--|
| 112 | p.Val156Phe  | V127F   | rs745608171  | 0.940 | 0.4 |  |
| 113 | p.Cys157Ser  | C128Ser | rs2049664994 | 0.879 | 1.5 |  |
| 114 | p.Asn160His  | N131H   | rs768220716  | 0.154 | 1.6 |  |
| 115 | p.Asn160Ser  | N131S   | rs117134739  | 0.032 | 3.8 |  |
| 116 | p.Thr162Ile  | T133I   | rs1459787773 | 0.296 | 1.6 |  |
| 117 | p.Ala163Asp  | A134D   | rs1378946788 | 0.045 | 1.1 |  |
| 118 | p.Trp166Arg  | W137R   | rs1015195326 | 0.911 | 0.8 |  |
| 119 | p.Ser167Phe  | S138F   | rs1362069107 | 0.924 | 0.7 |  |
| 120 | p.Leu168Pro  | L139P   | rs139076951  | 0.966 | 32  |  |
| 121 | p.Thr173Ile  | T144I   | rs1277204441 | 0.521 | 2.4 |  |
| 122 | p.Asn174Ser  | N145S   | rs751322397  | 0.004 | 3.0 |  |
| 123 | p.Ile175Asn  | I146N   | rs1346356853 | 0.894 | 2.1 |  |
| 124 | p.Leu176Pro  | L147P   | rs755647501  | 0.997 | 0.4 |  |
| 125 | p.Ser178Phe  | S149F   | rs1305248868 | 0.198 | 1.6 |  |
| 126 | p.Ser179Leu  | S150L   | rs374910265  | 0.993 | 0.8 |  |
| 127 | p.Arg180Gln  | R151Q   | rs369022610  | 0.299 | 4.4 |  |
| 128 | p.Ser181Thr  | S152T   | rs1213510652 | 0.032 | 0.8 |  |
| 129 | p.Tyr182Cys  | Y153C   | rs772645129  | 0.999 | 0.4 |  |
| 130 | p.Ala183Thr  | A154T   | rs12720754   | 0.230 | 183 |  |
| 131 | p.Met184Val  | M155V   | rs776669133  | 0.002 | 0.8 |  |
| 132 | p.Met184Iso  | M155I   | rs1172383595 | 0.002 | 0.7 |  |
| 133 | p.Leu185Phe  | L155F   | rs762060056  | 0.999 | 1.2 |  |
| 134 | p.Ala188Thr  | A159T   | rs1568036282 | 0.294 | 0.7 |  |
| 135 | p.Glu190Gln  | E161Q   | rs751371256  | 0.274 | 1.2 |  |
| 136 | p.His193Arg  | H164R   | rs1461565755 | 0.853 | 0.4 |  |
| 137 | p.Asn194Ser  | N165S   | rs2049677786 | 0.504 | 0.4 |  |
| 138 | p.Ala195Thr  | A166T   | rs767340249  | 0.129 | 2.8 |  |
| 139 | p.Ala195Val  | A166V   | rs376986357  | 0.101 | 8.3 |  |
| 140 | p.Ala196Val  | A167V   | rs756060281  | 0.006 | 0.8 |  |
| 141 | p.Gly197Asp  | G168D   | rs753361228  | 0.994 | 2.8 |  |
| 142 | p.Iso198Leu  | I169L   | rs778647989  | 0.002 | 0.4 |  |
| 143 | p.Pro199Leu  | P170L   | rs553520266  | 0.834 | 4.8 |  |
| 144 | p.Lys201Thr  | K172T   | rs769174358  | 0.997 | 0.8 |  |
| 145 | p.Lys201Glu  | K172E   | rs2049677865 | 0.978 | 0.4 |  |
| 146 | p.Pro202Leu  | P173L   | rs148460287  | 0.785 | 32  |  |
| 147 | p.Leu203Pro  | L174P   | rs1175840645 | 0.556 | 0.7 |  |
| 148 | p.Tyr204Asn  | Y175N   | rs2049678156 | 1.000 | 1.4 |  |
| 149 | p.Glu205Lys  | E176K   | rs763223753  | 0.038 | 3.6 |  |
| 150 | p.Asp206Val  | D177V   | rs767268916  | 0.177 | 0.4 |  |
| 151 | p.Ala209Thr  | A180T   | rs775328930  | 0.008 | 0.8 |  |
| 152 | p.Ser211Gly  | S182G   | rs760563261  | 0.412 | 0.8 |  |
| 153 | p.Ser211Ile  | S182I   | rs148144906  | 0.976 | 0.8 |  |
| 154 | p.Asn212Asp  | N183D   | rs764076582  | 0.988 | 2.0 |  |
| 155 | p.Asn212Lys  | N183K   | rs753408382  | 1.000 | 3.2 |  |
| 156 | p.Ala214Thr  | A185T   | rs142677199  | 0.962 | 3.2 |  |
| 157 | pAla214Gly   | A185G   | rs1354264426 | 0.480 | 1.6 |  |
| 158 | p.Lys216Arg  | K187R   | rs2049678808 | 0.006 | 6.0 |  |
| 159 | p.Gln217Glu  | Q188E   | rs1209300158 | 0.011 | 0.8 |  |
| 160 | p.Gly219Ser  | G190S   | rs750097881  | 0.994 | 2.1 |  |
| 161 | p.Gly219Val  | G190V   | rs769812428  | 0.998 | 0.4 |  |
| 162 | p.Phe220Leu  | F191L   | rs772619837  | 0.239 | 0.4 |  |
| 163 | p.Asp222Glu  | D193E   | rs751284054  | 0.857 | 0.4 |  |
| 164 | p.Asp222Asn  | D193N   | rs765803965  | 0.812 | 0.4 |  |
| 165 | p. Thr223Met | T194M   | rs759167880  | 0.351 | 2.3 |  |
| 166 | p.Ala225Ser  | A196S   | rs753023714  | 0.383 | 5.2 |  |
| 167 | p.Tyr226His  | Y197H   | rs756638375  | 0.980 | 0.4 |  |
| 168 | p.Trp227Arg  | W198R   | rs111998398  | 1.000 | 0.4 |  |
| 169 | p.Arg228Cys  | R199C   | rs141543325; | 0.994 | 24  |  |

Table S2

|     |             |                    |                  |       |      |        |
|-----|-------------|--------------------|------------------|-------|------|--------|
| 170 | p.Arg228His | R199H              | rs1455284992     | 0.987 | 1.6  |        |
| 171 | p.Ser229Phe | S200F              | rs1376819053     | 0.441 | 0.4  |        |
| 172 | p.Trp230Cys | W201C              | rs757421466      | 0.635 | 0.8  |        |
| 173 | p.Asn232Thr | N203T              | rs1160172583     | 0.012 | 0.4  |        |
| 174 | p.Ser233Thr | S204T              | rs901989090      | 0.022 | 0.4  |        |
| 175 | p.Ser233Phe | S204F              | rs998995786      | 0.959 | 0.4  |        |
| 176 | p.Pro234Ser | P205S              | rs778841130      | 0.146 | 0.8  |        |
| 177 | p.Glu237Lys | E208K              | rs773728684      | 0.050 | 1.6  |        |
| 178 | p.Asp239Tyr | D210Y              | rs77294580rs     | 0.026 | 0.4  |        |
| 179 | p.Glu241Gln | E212Q              | rs763411587      | 0.239 | 0.4  |        |
| 180 | p.His242Tyr | H213Y              | rs749170321      | 0.004 | 0.4  |        |
| 181 | p.Tyr244Cys | Y215C              | rs3730025; (7,8) | 1.000 | 1068 | 45 (9) |
| 182 | p.Tyr244His | Y215H              | rs2049686933     | 0.998 | 0.4  |        |
| 183 | p.Gln245Glu | Q216E              | rs2049687041     | 0.004 | 1.1  |        |
| 184 | p.Leu247Pro | L218P              | rs1469557705     | 0.997 | 0.4  |        |
| 185 | p.Glu248Gln | E219Q              | rs775849960      | 0.144 | 0.8  |        |
| 186 | p.Pro249Leu | P220L              | rs760966452      | 0.999 | 0.4  |        |
| 187 | p.Leu250Val | L221V              | rs1409716305     | 0.979 | 0.8  |        |
| 188 | p.Leu250Pro | L221P              | s764359224       | 1.000 | 0.4  |        |
| 189 | p.Tyr251His | Y222H              | rs1279450935     | 1.000 | 0.4  |        |
| 190 | p.Leu252Pro | L223P              | rs2049687508     | 0.997 | 0.4  |        |
| 191 | p.Val256Val | A227V              | rs758714422      | 0.991 | 0.8  |        |
| 192 | p.Phe257Leu | F228L              | rs780365048      | 0.415 | 0.4  |        |
| 193 | p.Val258Ile | V229I              | rs747960808      | 0.546 | 1.9  |        |
| 194 | p.Arg259Cys | R230C              | rs777408360      | 1.000 | 1.2  |        |
| 195 | p.Arg259His | R230H              | rs370903033;     | 0.995 | 1.2  | Low    |
| 196 | p.Arg260Cys | R231C              | rs147670020      | 0.805 | 0.8  |        |
| 197 | p.Arg260His | R231H              | rs150011877      | 0.426 | 2.4  |        |
| 198 | p.Ala261Ser | A232S <sup>c</sup> | rs4303; (11)     | 0.848 | 742  |        |
| 199 | p.Arg261Val | A232V              | rs564933233      | 0.589 | 0.8  |        |
| 200 | p.His263Tyr | H234Y              | rs1478780828     | 0.010 | 1.1  |        |
| 201 | p.Arg264Cys | R235C              | rs1249291422     | 0.972 | 2.8  |        |
| 202 | pArg264His  | R235H              | rs776828648      | 0.314 | 0.8  |        |
| 203 | p.Tyr266Cys | Y237C              | rs373616533      | 1.000 | 0.8  |        |
| 204 | p.Gly267Arg | G238R              | rs149412997;     | 0.973 | 33   |        |
| 205 | p.Asp268Asn | D239N              | rs1403582878     | 0.146 | 0.7  |        |
| 206 | p.Asp268Glu | D239E              | rs766561924      | 0.025 | 0.4  |        |
| 207 | p.Tyr270Asn | Y241N              | rs2049688901     | 0.119 | 6.0  |        |
| 208 | p.Ile271Val | I242V              | rs530535736      | 0.065 | 0.8  |        |
| 209 | p.Gly275Arg | G246R              | rs1316614976     | 0.897 | 2.1  |        |
| 210 | p.Pro276Ala | P247A              | rs777657188      | 0.371 | 0.7  |        |
| 211 | p.Ile277Val | I248V              | rs757233793      | 0.753 | 1.2  |        |
| 212 | p.Pro278Thr | P249T              | rs1229110590     | 1.000 | 0.4  |        |
| 213 | p.His280Arg | H251R              | rs1303022378     | 0.999 | 0.8  |        |
| 214 | p.Leu281Gln | L252Q              | rs778759109      | 1.000 | 0.8  |        |
| 215 | p.Leu282Pro | L253P              | rs1040577967     | 0.999 | 1.1  |        |
| 216 | p.Met285Val | M256V              | rs923234679      | 0.712 | 0.4  |        |
| 217 | p.Met285Thr | M256T              | rs747832023      | 1.000 | 1.2  |        |
| 218 | p.Met285Ile | M256I              | rs1749235389     | 0.712 | 0.8  |        |
| 219 | p.Trp286Gly | W257G              | rs1365148386     | 0.999 | 0.4  |        |
| 220 | p.Ala287Ser | A258S              | rs1218416633     | 0.690 | 0.4  |        |
| 221 | p.Ala287Val | A258V              | rs770340552      | 0.987 | 0.4  |        |
| 222 | p.Gln288Arg | Q259R              | rs199591851      | 0.998 | 74   |        |
| 223 | p.Ser289Asn | S260N              | rs763587114      | 0.354 | 0.4  |        |
| 224 | p.Trp290Ser | W261S              | rs1266264733     | 1.000 | 0.4  |        |
| 225 | p.Glu291Lys | E262K              | rs1464640594     | 0.194 | 0.4  |        |
| 226 | p.Glu291Ala | E262A              | rs771517816      | 0.172 | 0.4  |        |
| 227 | p.Asp295Asn | D266N              | rs989500910      | 0.308 | 0.4  |        |

Table S2

|     |             |       |                 |       |     |        |
|-----|-------------|-------|-----------------|-------|-----|--------|
| 228 | p.Met296Val | M267V | rs1190943736    | 0.011 | 0.4 |        |
| 229 | p.Val297Met | V268M | rs61740982      | 0.267 | 4.8 |        |
| 230 | p.Val298Met | V269M | rs752924819     | 0.054 | 1.1 |        |
| 231 | p.Pro299Thr | P270T | rs760860250     | 0.983 | 0.4 |        |
| 232 | p.Asp302Tyr | D273Y | rs139813210     | 0.890 | 0.4 |        |
| 233 | p.Pro304Leu | P275L | rs1419966263    | 0.105 | 0.4 |        |
| 234 | p.Asn305Ser | N276S | rs141186617     | 0.000 | 11  |        |
| 235 | p.Leu306Arg | L277R | rs1044992578    | 0.315 | 0.4 |        |
| 236 | p.Asp307Asn | D278N | rs532619151     | 0.875 | 0.4 |        |
| 237 | p.Asp307Gly | D278G | rs754511687     | 0.995 | 0.8 |        |
| 238 | p.Thr309Ala | T280A | rs747796419     | 0.700 | 0.4 |        |
| 239 | p.Ser310Gly | S281G | rs144137849     | 0.009 | 18  |        |
| 240 | p.Ser310Asn | S281N | rs774789681     | 0.003 | 0.4 |        |
| 241 | p.Thr311Ser | T282S | rs746377185     | 0.008 | 1.2 |        |
| 242 | p.Met312Val | M283V | rs367998749     | 0.738 | 2.4 |        |
| 243 | p.Met312Thr | M283T | rs201588518     | 0.999 | 1.6 |        |
| 244 | p.Gly316Cys | G287C | rs561813163     | 0.994 | 0.4 |        |
| 245 | p.Gly316Val | G287V | rs2049710108    | 0.998 | 0.4 |        |
| 246 | p.Ala319Ser | A290S | rs34126458      | 0.120 | 90  |        |
| 247 | p.Ala319Val | A290V | rs2049710282    | 0.019 | 0.4 |        |
| 248 | p.Thr320Ala | T291A | rs1384833654    | 0.030 | 0.4 |        |
| 249 | p.Thr320Met | T291M | rs139137100     | 0.163 | 0.7 |        |
| 250 | p.His321Tyr | H292Y | rs2049710489    | 0.102 | 0.7 |        |
| 251 | p.Met322Val | M293V | rs1391141938    | 0.738 | 0.8 |        |
| 252 | p.Arg324Trp | R295W | rs35141294      | 0.975 | 202 |        |
| 253 | p.Arg324Gln | R295Q | rs374029266     | 0.028 | 3.2 |        |
| 254 | p.Val325Met | V296M | rs771762179     | 0.207 | 0.4 |        |
| 255 | p.Ala326Thr | A297T | rs1273653682    | 0.940 | 1.6 |        |
| 256 | p.Glu328Lys | E299K | rs992848550     | 0.240 | 0.8 |        |
| 257 | p.Phe330Leu | F301L | rs763740829     | 0.954 | 3.6 |        |
| 258 | p.Thr331Ser | T302S | rs1444816395    | 0.030 | 0.7 |        |
| 259 | p.Leu333Val | L304V | rs983222441     | 0.824 | 0.7 |        |
| 260 | p.Leu333Gln | L304Q | rs761390621;    | 1.000 | 0.7 | Low    |
| 261 | p.Glu334Gln | E305Q | rs1336871330    | 0.295 | 0.7 |        |
| 262 | p.Pro337Ser | P308S | rs764882826     | 0.077 | 0.4 |        |
| 263 | p.Pro337Leu | P308L | rs750754792     | 0.626 | 1.2 |        |
| 264 | p.Met338Val | M309V | rs1414191617    | 0.307 | 1.5 |        |
| 265 | p.Met338Ile | M309I | rs1422578392    | 0.797 | 0.7 |        |
| 266 | p.Pro339Ser | P310S | rs1455859263    | 0.392 | 0.8 |        |
| 267 | p.Glu341Gln | E312Q | rs201456235     | 0.172 | 1.2 |        |
| 268 | p.Phe342Ser | F313S | rs755446607     | 1.000 | 0.4 |        |
| 269 | p.Ser346Leu | S317L | rs781272495     | 0.994 | 1.2 |        |
| 270 | p.Leu348Pro | L319P | rs769913687     | 0.995 | 0.4 |        |
| 271 | p.Glu349Ala | E320A | rs778126198     | 0.203 | 0.4 |        |
| 272 | p.Lys350Gln | K321Q | rs2049712159    | 0.060 | 0.4 |        |
| 273 | p.Pro351Leu | P322L | rs2229839; (7)  | 0.832 | 24  |        |
| 274 | p.Asp353Asn | D324N | rs148193919     | 0.100 | 22  |        |
| 275 | p.Gly354Arg | G325R | rs56394458; (7) | 0.998 | 780 |        |
| 276 | p.Arg355Trp | R326W | rs776297611     | 0.993 | 2.0 |        |
| 277 | p.Arg355Gln | R326Q | rs761322765     | 0.487 | 1.6 |        |
| 278 | p.Glu356Lys | E327K | rs553718986     | 0.014 | 0.4 |        |
| 279 | p.Val357Met | V328M | rs1273328602    | 0.296 | 0.7 |        |
| 280 | p.Val358Met | V329M | rs764651696     | 0.928 | 1.2 |        |
| 281 | p.His360Tyr | H331Y | rs199690936     | 0.442 | 0.4 |        |
| 282 | p.His360Arg | H331R | rs2049713014    | 0.456 | 0.4 |        |
| 283 | p.Ala361Thr | A332T | rs546455400     | 0.992 | 6.0 |        |
| 284 | p.Ser362Thr | S333T | rs1274888100    | 0.460 | 0.8 |        |
| 285 | p.Ser362Trp | S333W | rs142328237;    | 1.000 | 6.8 | 71(12) |

Table S2

|     |             |       |              |       |     |        |
|-----|-------------|-------|--------------|-------|-----|--------|
| 286 | p.Ala363Pro | A334P | rs1443267419 | 0.999 | 0.4 |        |
| 287 | p.Ala363Val | A334V | rs370491569  | 0.999 | 1.2 |        |
| 288 | p.Thr364Cys | W335C | rs1325867826 | 0.996 | 0.4 |        |
| 289 | p.Asn368Ser | N339S | rs369713789  | 0.098 | 0.8 |        |
| 290 | p.Asn368Lys | N339K | rs1482676646 | 0.557 | 1.1 |        |
| 291 | p.Arg369Gly | R340G | rs373357172  | 0.098 | 1.5 |        |
| 292 | p.Lys370Arg | K341R | rs1176719016 | 0.008 | 0.4 |        |
| 293 | p.Arg373Ser | R344S | rs189243320  | 1.000 | 3.2 |        |
| 294 | p.Lys375Arg | K345R | rs778168348  | 0.983 | 0.4 |        |
| 295 | p.Arg379Trp | R350W | rs750724647  | 0.983 | 4.4 |        |
| 296 | p.Arg379Gln | R350Q | rs13306085   | 0.983 | 2.4 |        |
| 297 | p.Val380Asp | V351D | rs752385390  | 0.776 | 0.4 |        |
| 298 | p.Thr381Met | T352M | rs150466411; | 0.998 | 85  |        |
| 299 | p.Met382Val | M353V | rs370890237  | 0.236 | 0.4 |        |
| 300 | p.Met382Thr | M353T | rs2049726728 | 0.291 | 0.4 |        |
| 301 | p.Met382Ile | M353I | rs770475936  | 0.316 | 0.4 |        |
| 302 | p.Asp383Tyr | D354Y | rs2049726795 | 0.947 | 1.1 |        |
| 303 | p.Asp383Gly | D354G | rs374899854  | 0.215 | 0.4 |        |
| 304 | p.Thr387Ala | T358A | rs1347736201 | 0.355 | 1.6 |        |
| 305 | p.His389Gln | H360Q | rs1405848294 | 1.000 | 0.7 |        |
| 306 | p.Met392Thr | M363T | rs138418851  | 0.991 | 4.0 |        |
| 307 | p.Gly393Asp | G364D | rs2049727156 | 0.999 | 0.7 |        |
| 308 | p.His394Arg | H365R | rs775932125  | 0.977 | 0.8 |        |
| 309 | p.Ile395Met | I366M | rs760885341  | 0.896 | 0.4 |        |
| 310 | p.Gln400Lys | Q371K | rs771386010  | 0.334 | 1.2 |        |
| 311 | p.Gln400Arg | Q371R | rs548450663  | 0.436 | 0.4 |        |
| 312 | p.Tyr401Cys | Y372C | rs765449601  | 0.986 | 1.2 |        |
| 313 | p.Lys402Met | K373M | rs1329993082 | 0.940 | 0.8 |        |
| 314 | p.Asp403Ala | D374A | rs763292265  | 0.045 | 0.8 |        |
| 315 | p.Leu404Val | L375V | rs1229622121 | 0.112 | 0.7 |        |
| 316 | p.Pro405Arg | P376R | rs766454164  | 0.996 | 1.5 |        |
| 317 | p.Val406Ile | V377I | rs201117983  | 0.050 | 31  |        |
| 318 | p.Ser407Phe | S378F | rs570424963  | 0.354 | 1.5 |        |
| 319 | p.Leu408Pro | L379P | rs2049728056 | 0.999 | 0.4 |        |
| 320 | p.Arg409Cys | R380C | rs199746395  | 1.000 | 2.4 |        |
| 321 | p.Arg409His | R380H | rs371833006  | 0.995 | 4.8 |        |
| 322 | p.Arg410Trp | R381W | rs370836540  | 0.783 | 2.8 |        |
| 323 | p.Arg410Gln | R381Q | rs145172277  | 0.004 | 75  |        |
| 324 | p.Gly411Arg | G382R | rs1347844823 | 1.000 | 0.4 |        |
| 325 | p.Ala412Ser | A383S | rs779643154  | 0.987 | 0.8 |        |
| 326 | p.Asn413Ser | N384S | rs1308632106 | 0.848 | 15  |        |
| 327 | p.Asn413Lys | N384K | rs1352223425 | 1.000 | 1.6 |        |
| 328 | p.Gly415Ser | G386S | rs149252911  | 0.990 | 5.6 |        |
| 329 | p.Gly415Asp | G386D | rs1350271986 | 0.999 | 0.4 |        |
| 330 | p.His417Arg | H388R | rs1229041283 | 0.910 | 0.4 |        |
| 331 | p.Glu418Lys | E389K | rs1599141410 | 0.998 | 55  | Korean |
| 332 | p.Ala419Ser | A390S | rs1311367540 | 0.963 | 1.1 |        |
| 333 | p.Ile420Thr | I391T | rs144494842  | 0.996 | 22  |        |
| 334 | p.Ile420Val | I391V | rs2049728955 | 0.266 | 0.4 |        |
| 335 | p.Gly421Glu | G392E | rs2049729061 | 0.999 | 6.0 |        |
| 336 | p.Val423Met | V394M | rs148018765  | 0.697 | 7.6 |        |
| 337 | p.Ala425Val | A396V | rs372626836  | 0.811 | 2.8 |        |
| 338 | p.Leu426Arg | L397R | rs1295075641 | 1.000 | 0.8 |        |
| 339 | p.Ser427Leu | S398L | rs1484293906 | 0.995 | 2.4 |        |
| 340 | p.Val428Leu | V399L | rs1368163348 | 0.916 | 0.4 |        |
| 341 | p.Val428Gly | V399G | rs774484341  | 0.997 | 2.8 |        |
| 342 | p.Ser429Phe | S400F | rs1430341434 | 0.316 | 8.7 |        |
| 343 | p.Pro431Leu | P402L | rs2049729701 | 0.907 | 0.4 |        |

Table S2

|     |             |       |               |       |     |           |
|-----|-------------|-------|---------------|-------|-----|-----------|
| 344 | p.His433Arg | H404R | rs763905584   | 0.928 | 0.8 |           |
| 345 | p.Leu434Val | L405V | rs753578845   | 0.859 | 11  |           |
| 346 | p.His435Leu | H406L | rs757195769   | 0.019 | 0.4 |           |
| 347 | p.Lys436Arg | K407R | rs765088731   | 0.077 | 0.4 |           |
| 348 | p.Gly438Ser | G409S | rs1051245483  | 0.844 | 0.8 |           |
| 349 | p.Gly438Asp | G409D | rs757908100   | 0.927 | 0.8 |           |
| 350 | p.Leu440Val | L411V | rs199697957   | 0.364 | 12  |           |
| 351 | p.Leu440Gln | L411Q | rs748465912   | 0.991 | 1.1 |           |
| 352 | p.Asp441Asn | D412N | rs770430455   | 0.045 | 0.8 |           |
| 353 | p.Arg442Cys | R413C | rs749779360   | 0.002 | 2.0 |           |
| 354 | p.Arg442His | R413H | rs35865660    | 0.001 | 132 |           |
| 355 | p.Asn445Asp | N416D | rs776411660   | 0.012 | 0.4 |           |
| 356 | p.Asn445Lys | N416K | rs2037090472  | 0.143 | 0.4 |           |
| 357 | p.Asp446Asn | D417N | rs2049730943  | 0.170 | 0.7 |           |
| 358 | p.Thr447Ala | T418A | rs761659396   | 0.004 | 1.5 |           |
| 359 | p.Thr447Met | T418M | rs746314800   | 0.046 | 4.8 |           |
| 360 | p.Ser449Gly | S420G | rs2049737716  | 0.104 | 0.4 |           |
| 361 | p.Ser449Thr | S420T | rs373076770   | 0.059 | 0.7 |           |
| 362 | p.Asp450Asn | D421N | rs185115105   | 0.310 | 0.8 |           |
| 363 | p.Ile451Val | I422V | rs1401663578  | 0.305 | 0.4 |           |
| 364 | p.Ile451Thr | I422T | rs1158360384  | 0.820 | 1.4 |           |
| 365 | p.Lys456Gln | K427Q | rs2049738166  | 0.121 | 6.0 |           |
| 366 | p.Ala458Val | A429V | rs1388880245  | 0.963 | 0.4 |           |
| 367 | p.Ile462Phe | I433F | rs1370566904  | 0.861 | 0.8 |           |
| 368 | p.Ile462Asn | I433N | rs1289633744  | 1.000 | 0.4 |           |
| 369 | p.Phe464Ile | F435I | rs2049738685  | 0.869 | 0.4 |           |
| 370 | p.Gly468Cys | G439C | rs1170017440  | 0.996 | 1.4 |           |
| 371 | p.Val471Met | V442M | rs768818130   | 0.323 | 0.8 |           |
| 372 | p.Trp474Arg | W445R | rs772897915   | 0.999 | 0.4 |           |
| 373 | p.Arg475Cys | R446C | rs770628079   | 1.000 | 1.6 |           |
| 374 | p.Arg475His | R446H | rs774394975   | 1.000 | 4.3 |           |
| 375 | p.Gly477Glu | G448E | rs986987823   | 0.279 | 1.1 |           |
| 376 | p.Phe479Val | F450V | rs760413658   | 0.999 | 0.4 |           |
| 377 | p.Ser480Asn | S451N | rs886053220   | 0.055 | 0.4 |           |
| 378 | p.Arg482Cys | R453C | rs201540553;  | 0.649 | 19  |           |
| 379 | p.Arg482His | R453H | rs757694144   | 0.006 | 4.4 |           |
| 380 | p.Thr483Ile | T454I | rs2049740100  | 0.833 | 0.4 |           |
| 381 | p.Pro484Arg | P455R | rs1365864797; | 0.615 | 0.4 |           |
| 382 | p.Pro485Ala | P456A | rs202178737   | 0.059 | 9.1 |           |
| 383 | p.Pro485Arg | P456R | rs28730839    | 0.301 | 48  |           |
| 384 | p.Ser486Phe | S457F | rs748305912   | 0.923 | 0.4 |           |
| 385 | p.Arg487Cys | R458C | rs149784122   | 0.972 | 25  |           |
| 386 | p.Arg487His | R458H | rs376430907   | 0.235 | 7.2 |           |
| 387 | p.Tyr488Ser | Y459S | rs948392443   | 0.999 | 1.1 |           |
| 388 | p.Asn489Asp | N460D | rs745820101   | 0.999 | 2.1 |           |
| 389 | p.Asn489Lys | N460K | rs145755731   | 1.000 | 0.8 |           |
| 390 | p.Asp491Asn | D462N | rs371335496   | 0.152 | 0.4 |           |
| 391 | p.Asp491Glu | D462E | rs1254289491  | 0.054 | 0.7 |           |
| 392 | p.Trp493Arg | W464R | rs2049741339  | 0.999 | 0.4 |           |
| 393 | p.Trp493Cys | W464C | rs1182135727  | 0.992 | 0.4 |           |
| 394 | p.Tyr494Asp | Y465D | rs760325775;  | 0.011 | 2.4 | 700 (13 ) |
| 395 | p.Leu495Phe | L466F | rs374169715   | 0.974 | 0.4 |           |
| 396 | p.Arg496Gln | R467Q | rs761345398;  | 1.000 | 1.9 | Low       |
| 397 | p.Thr497Ala | T468A | rs766717973   | 0.382 | 0.4 |           |
| 398 | p.Lys498Arg | K469R | rs752110462   | 0.217 | 2.4 |           |
| 399 | p.Tyr499Cys | Y470C | rs779110765   | 0.999 | 2.8 |           |
| 400 | p.Gln500Arg | Q471R | rs1330033201  | 0.956 | 0.8 |           |
| 401 | p.Gly501Arg | G472R | rs886053221   | 1.000 | 5.0 |           |

Table S2

|     |             |       |              |       |     |          |
|-----|-------------|-------|--------------|-------|-----|----------|
| 402 | p.Gly501Glu | G472E | rs767656727  | 1.000 | 0.4 |          |
| 403 | p.Cys503Ser | C474S | rs1485835785 | 0.133 | 0.4 |          |
| 404 | p.Pro504Ser | P475S | rs778204413  | 0.912 | 1.6 |          |
| 405 | p.Pro504Leu | P475L | rs557514021  | 1.000 | 20  |          |
| 406 | p.Pro505Ala | P475A | rs148943954; | 0.939 | 59  |          |
| 407 | p.Val506Ile | V476I | rs747001287  | 0.480 | 0.8 |          |
| 408 | p.Thr507Ala | T478A | rs1385293426 | 0.001 | 0.7 |          |
| 409 | p.Thr507Ser | T478S | rs1225189746 | 0.004 | 0.7 |          |
| 410 | p.Arg508Gln | R479Q | rs746397573  | 0.999 | 2.0 |          |
| 411 | p.Asn509Asp | N480D | rs769290119  | 0.071 | 0.4 |          |
| 412 | p.Glu510Lys | E481K | rs371544905  | 0.847 | 2.4 |          |
| 413 | p.Thr511Ala | T482A | rs762574298  | 0.027 | 1.6 |          |
| 414 | p.Asp514Asn | D485N | rs201762720  | 1.000 | 4.4 |          |
| 415 | p.Ala515Ser | A486S | rs144294634  | 0.978 | 30  |          |
| 416 | p.His520Asn | H491N | rs767844081  | 0.983 | 2.8 |          |
| 417 | p.His520Arg | H491R | rs1222739179 | 0.963 | 0.7 |          |
| 418 | p.Val521Ile | V492I | rs2049749257 | 0.072 | 0.4 |          |
| 419 | p.Pro522Leu | P493L | rs2049749316 | 0.994 | 6.0 |          |
| 420 | p.Asn523His | N494H | rs1053930450 | 0.705 | 0.8 |          |
| 421 | p.Asn523Ser | N494S | rs1195088899 | 0.121 | 0.7 |          |
| 422 | p.Val524Met | V495M | rs1198635867 | 0.836 | 1.4 |          |
| 423 | p.Val524Ala | V495A | rs12720746   | 0.150 | 4.0 |          |
| 424 | p.Thr525Ile | T496I | rs1251832995 | 0.485 | 0.4 |          |
| 425 | p.Thr525Ala | T496A | rs764244232  | 0.090 | 0.4 |          |
| 426 | p.Pro526Thr | P497S | rs754150700  | 0.997 | 0.7 |          |
| 427 | p.Tyr527Cys | Y498C | rs376323371  | 0.997 | 2.0 |          |
| 428 | p.Ile528Met | I499M | rs2029861083 | 0.898 | 0.4 |          |
| 429 | p.Arg529Ser | R500S | rs368074905  | 0.918 | 1.5 |          |
| 430 | p.Tyr530Cys | Y501C | rs745506888  | 0.999 | 1.2 |          |
| 431 | p.Tyr530His | Y501H | rs2029861365 | 0.942 | 0.4 |          |
| 432 | p.Phe531Cys | F502C | rs551801825  | 1.000 | 0.4 |          |
| 433 | p.Val532Leu | V503L | rs2029861375 | 0.456 | 0.7 |          |
| 434 | p.Phe534Leu | F505L | rs1390757637 | 0.274 | 0.7 |          |
| 435 | p.Val535Ile | V506I | rs1190471425 | 0.097 | 2.1 |          |
| 436 | p.Gln537Arg | Q508R | rs762937072  | 0.919 | 2.4 |          |
| 437 | p.Gln537His | Q508H | rs868856670  | 0.995 | 0.7 |          |
| 438 | p.Phe538Leu | F509L | rs769230286  | 0.963 | 0.4 |          |
| 439 | p.Gln539Lys | Q510K | rs1474365321 | 1.000 | 0.8 |          |
| 440 | p.His541Arg | H512R | rs776858777  | 0.998 | 0.4 |          |
| 441 | p.Glu542Gly | E513G | rs1453609198 | 0.665 | 0.7 |          |
| 442 | p.Ala543Val | A514V | rs765347178  | 0.751 | 0.8 |          |
| 443 | p.Ala543Ser | A514S | rs762055246  | 0.547 | 2.3 |          |
| 444 | p.Gly549Asp | G520D | rs1328713530 | 0.965 | 0.8 |          |
| 445 | p.Tyr550Cys | Y521C | rs753761783  | 0.751 | 1.2 |          |
| 446 | p.Gly552Ser | G523S | rs1339063327 | 0.678 | 0.7 |          |
| 447 | p.Gly552Asp | G523D | rs145152527  | 0.245 | 2.4 |          |
| 448 | p.Leu554Pro | L525P | rs2029861451 | 0.992 | 0.8 |          |
| 449 | p.His555Tyr | H526Y | rs778451287  | 0.721 | 1.2 |          |
| 450 | p.Cys557Arg | C528R | rs1012505443 | 1.000 | 1.9 |          |
| 451 | p.Asp558Asn | D529N | rs2029861470 | 0.878 | 0.4 |          |
| 452 | p.Ile559Val | I530V | rs1205538057 | 0.224 | 0.4 |          |
| 453 | p.Ile559Thr | I530T | rs2029861475 | 0.984 | 6.0 |          |
| 454 | p.Tyr560Cys | Y531C | rs745536540  | 0.996 | 0.4 |          |
| 455 | p.Arg561Trp | R532W | rs4314; (7)  | 0.783 | 78  | 500 (14) |
| 456 | p.Arg561Leu | R532L | rs780299861  | 0.082 | 1.2 |          |
| 457 | p.Ser562Pro | S533P | rs1599142834 | 0.993 | 0.4 |          |
| 458 | p.Thr563Pro | T534P | rs747313119  | 0.047 | 0.4 |          |
| 459 | p.Thr563Ile | T534I | rs769142434  | 0.179 | 16  |          |



Table S2

|     |             |       |              |       |           |        |
|-----|-------------|-------|--------------|-------|-----------|--------|
| 460 | p.Lys564Glu | K535E | rs1171059871 | 0.002 | 0.7       |        |
| 461 | p.Lys564Thr | K535T | rs1599142842 | 0.025 | <b>34</b> | Korean |
| 462 | p.Ala565Thr | A536T | rs777339023; | 0.976 | 4.8       |        |
| 463 | p.Ala565Val | A536V | rs2029861504 | 0.945 | 0.4       |        |
| 464 | p.Gly566Arg | G537R | rs748643856  | 1.000 | 0.8       |        |
| 465 | p.Gly566Glu | G537E | rs769805183  | 1.000 | 2.4       |        |
| 466 | p.Ala567Val | A538V | rs1422455629 | 0.358 | <b>20</b> |        |
| 467 | p.Ala567Thr | A538T | rs1399318948 | 0.059 | 0.4       |        |
| 468 | p.Leu569Val | L540V | rs1318295451 | 0.952 | 0.4       |        |
| 469 | p.Leu569Pro | L540P | rs773305413  | 1.000 | 0.4       |        |
| 470 | p.Arg570Trp | R541W | rs567828872  | 0.983 | <b>15</b> |        |
| 471 | p.Arg570Gln | R541Q | rs371599063  | 0.137 | 2.4       |        |
| 472 | p.Lys571Thr | K542T | rs2029862390 | 0.040 | 0.7       |        |
| 473 | p.Lys571Asn | K542N | rs777717910  | 0.096 | 3.6       |        |
| 474 | p.Leu573Pro | L544P | rs1365063879 | 0.999 | 0.8       |        |
| 475 | p.Gln574Lys | Q545K | rs2029862424 | 0.003 | 0.4       |        |
| 476 | p.Gln574Leu | Q545L | rs2029862431 | 0.046 | 0.7       |        |
| 477 | p.Gly576Ala | G547A | rs1243492273 | 0.989 | 0.4       |        |
| 478 | p.Ser577Pro | S548P | rs749450863  | 0.146 | 1.1       |        |
| 479 | p.Ser578Phe | S549F | rs2029862464 | 1.000 | 0.7       |        |
| 480 | p.Pro580Leu | P551L | rs897870088  | 0.805 | 0.8       |        |
| 481 | p.Pro580Thr | P551T | rs759719543  | 0.119 | 2.4       |        |
| 482 | p.Trp581Cys | W552C | rs1337718181 | 1.000 | 0.4       |        |
| 483 | p.Glu583Asp | E554D | rs1198303493 | 0.001 | 0.4       |        |
| 484 | p.Val584Met | V555M | rs2029862514 | 0.985 | 0.4       |        |
| 485 | p.Leu585Pro | L556P | rs776358299  | 0.998 | 0.8       |        |
| 486 | p.Lys586Glu | K557E | rs371414386  | 0.013 | 1.1       |        |
| 487 | p.Lys586Arg | K557R | rs1489606366 | 0.009 | 0.4       |        |
| 488 | p.Asp587Asn | D558N | rs1182072433 | 0.001 | 0.8       |        |
| 489 | p.Met588Val | M559V | rs1429588559 | 0.020 | 1.1       |        |
| 490 | p.Met588Thr | M559T | rs1171932485 | 0.092 | 0.4       |        |
| 491 | p.Gly590Ser | G561S | rs762585402  | 0.898 | <b>34</b> |        |
| 492 | p.Gly590Asp | G561D | rs1176792351 | 0.882 | 0.4       |        |
| 493 | p.Asp592Gly | D563G | rs12709426;  | 0.047 | 382       |        |
| 494 | p.Asp592Asn | D563N | rs1450198005 | 0.022 | 0.4       |        |
| 495 | p.Leu594Pro | L565P | rs781708329  | 0.998 | 1.5       |        |
| 496 | p.Asp595Tyr | D566Y | rs753055168  | 0.992 | 0.4       |        |
| 497 | p.Ala596Ser | A567S | rs530248886  | 0.562 | 0.8       |        |
| 498 | p.Ala596Val | A567V | rs546796175  | 0.438 | 1.6       |        |
| 499 | p.Pro598Ser | P569S | rs988156346  | 0.522 | 0.4       |        |
| 500 | p.Pro598Leu | P569L | rs759009903  | 0.997 | 1.6       |        |
| 501 | p.Lys601Glu | K572E | rs1188841988 | 0.011 | 0.4       |        |
| 502 | p.Lys601Arg | K572R | rs776418026  | 0.037 | 0.8       |        |
| 503 | p.Phe603Ile | F574I | rs1178062715 | 0.999 | 0.4       |        |
| 504 | p.Thr607Asn | T578N | rs1477242406 | 0.085 | 0.4       |        |
| 505 | p.Gln608Pro | Q579P | rs1427973166 | 0.771 | 1.1       |        |
| 506 | p.Trp609Arg | W580R | rs1430977899 | 0.999 | 0.4       |        |
| 507 | p.Glu612Ala | E583A | rs773255356  | 0.991 | 2.0       |        |
| 508 | p.Asn614Ser | N585S | rs1568039509 | 0.837 | 0.4       |        |
| 509 | p.Asn617His | N588H | rs1455120932 | 0.209 | 0.4       |        |
| 510 | p.Asn617Ser | N588S | rs372497513  | 0.059 | 0.4       |        |
| 511 | p.Gly618Ser | G589S | rs111269527  | 0.435 | 2.5       |        |
| 512 | p.Glu619Lys | E590K | rs375452338  | 0.924 | 1.6       |        |
| 513 | p.Glu619Ala | E590A | rs1221968598 | 0.696 | 0.4       |        |
| 514 | p.Trp623Arg | W594R | (1,4)        | 1.000 | 0.4       | Low    |
| 515 | p.Pro624Arg | P595R | rs972271442  | 0.246 | 1.1       |        |
| 516 | p.Glu625Lys | E596K | rs754396876  | 0.680 | 0.8       |        |



Table S2

|     |             |       |              |       |     |  |
|-----|-------------|-------|--------------|-------|-----|--|
| 517 | p.Y626Asp   | Y597D | rs757708886  | 0.114 | 2.6 |  |
| 518 | p.Tyr626Ser | Y597S | rs778975417  | 0.049 | 4.0 |  |
| 519 | p.Trp628Cys | W599C | rs758471657  | 0.994 | 1.1 |  |
| 520 | p.His629Pro | H600P | rs201594771; | 0.001 | 506 |  |
| 521 | p.His629Tyr | H600Y | rs2029862989 | 0.043 | 0.4 |  |
| 522 | p.Pro630Leu | P601L | rs142818229  | 0.988 | 4.1 |  |
| 523 | p.Pro631Leu | P602L | rs749271989  | 0.018 | 3.4 |  |
| 524 | p.Asp634Glu | D605E | rs2029863038 | 0.000 | 6.0 |  |
| 525 | p.Asn635Ser | N606S | rs774004648  | 0.046 | 1.5 |  |
| 526 | p.Pro637Thr | P608T | rs759173310  | 0.998 | 0.4 |  |
| 527 | p.Pro637Leu | P608L | rs767112824  | 0.999 | 4.5 |  |
| 528 | p.Glu638Lys | E609K | rs760201372  | 0.125 | 9.8 |  |
| 529 | p.Gly639Val | G610V | rs754090770  | 0.410 | 0.8 |  |
| 530 | p.Gly639Ser | G610S | rs72845024   | 0.007 | 6.1 |  |
| 531 | p.Ile640Arg | I611R | rs1307478617 | 0.724 | 0.4 |  |
| 532 | p.Asp641Val | D612V | rs759386648  | 0.012 | 0.4 |  |
| 533 | p.Leu642Val | L613V | rs2029871862 | 0.396 | 0.7 |  |
| 534 | p.Val643Met | V614M | rs767279985  | 0.449 | 0.7 |  |
| 535 | p.Val643Ala | V614A | rs1317871269 | 0.098 | 0.4 |  |
| 536 | p.Thr644Ser | T615S | rs752660066  | 0.001 | 1.6 |  |
| 537 | p.Asp645Asn | D616N | rs763603427  | 0.995 | 1.4 |  |
| 538 | p.Asp645Ala | D616A | rs1281544974 | 0.995 | 1.1 |  |
| 539 | p.Ala649Val | A620V | rs2029872327 | 0.998 | 0.7 |  |
| 540 | p.Phe652Tyr | F623Y | rs1393713094 | 0.892 | 0.7 |  |
| 541 | p.Val653Met | V624M | rs1248095456 | 0.058 | 0.4 |  |
| 542 | p.Glu654Lys | E625K | rs2029872533 | 0.565 | 0.4 |  |
| 543 | p.Glu655Asp | E626D | rs1487276305 | 0.539 | 0.4 |  |
| 544 | p.Glu655Lys | E626K | rs1371611657 | 0.824 | 0.7 |  |
| 545 | p.Tyr656His | Y627H | rs2029872680 | 0.994 | 6.0 |  |
| 546 | p.Arg658Trp | R629W | rs778684365  | 0.581 | 0.8 |  |
| 547 | p.Ser660Cys | S631C | rs147429960; | 0.242 | 93  |  |
| 548 | p.Ser660Ala | S631A | rs2029873057 | 0.000 | 0.4 |  |
| 549 | p.Gln661Leu | Q632L | rs1406304639 | 0.001 | 0.4 |  |
| 550 | p.Gln661His | Q632H | rs2029873234 | 0.004 | 0.4 |  |
| 551 | p.Val662Gly | V633G | rs1379553980 | 0.002 | 0.4 |  |
| 552 | p.Val663Leu | V634L | rs1178170347 | 0.002 | 0.4 |  |
| 553 | p.Glu666Lys | E637K | rs201804955  | 0.313 | 33  |  |
| 554 | p.Glu666Asp | E637D | rs2029873572 | 0.160 | 0.4 |  |
| 555 | p.Tyr667Cys | Y638C | rs1434646780 | 0.938 | 0.4 |  |
| 556 | p.Glu669Lys | E640K | rs769228405  | 0.813 | 19  |  |
| 557 | p.Glu669Gly | E640G | rs1266247312 | 0.921 | 0.7 |  |
| 558 | p.Ala670Asp | A641D | rs1177823963 | 0.075 | 0.4 |  |
| 559 | p.Asn671Thr | N642T | rs538715770  | 0.121 | 1.5 |  |
| 560 | p.Asn673Lys | N644K | rs564928656  | 0.005 | 0.4 |  |
| 561 | p.Asn675His | N646H | rs1245129210 | 0.076 | 0.4 |  |
| 562 | p.Ile678Val | I649V | rs371131106  | 0.628 | 8.4 |  |
| 563 | p.Thr679Ile | T650I | rs532375661  | 0.635 | 0.4 |  |
| 564 | p.Thr679Ala | T650A | rs771872424  | 0.023 | 0.8 |  |
| 565 | p.Glu681Asp | E652D | rs764154741  | 0.002 | 0.4 |  |
| 566 | p.Thr682Asn | T653N | rs753705010  | 0.000 | 0.8 |  |
| 567 | p.Lys684Asn | K655N | rs1453772021 | 0.003 | 0.4 |  |
| 568 | p.Met691Val | M662V | rs775191459  | 0.000 | 0.4 |  |
| 569 | p.Gln692Lys | Q663K | rs1260448350 | 0.015 | 0.7 |  |
| 570 | p.Ile693Val | I664V | rs2029953456 | 0.000 | 0.8 |  |
| 571 | p.Ala694Thr | A665T | rs764410917  | 0.327 | 0.8 |  |

Table S2

|     |             |       |              |              |     |  |
|-----|-------------|-------|--------------|--------------|-----|--|
| 572 | p.Asn695Ser | N666S | rs762256846  | 0.053        | 1.4 |  |
| 573 | p.His696Asn | H667N | rs1187097777 | <b>0.688</b> | 0.4 |  |
| 574 | p.His696Leu | H667L | rs2029954191 | 0.269        | 4.7 |  |
| 575 | p.Thr697Asn | T668N | rs765315607  | <b>0.928</b> | 1.1 |  |
| 576 | p.Gly701Ser | G672S | rs1172339137 | <b>0.999</b> | 3.2 |  |
| 577 | p.Thr702Asn | T673N | rs2029955964 | 0.001        | 0.4 |  |
| 578 | p.Gln703His | Q674H | rs751787326  | 0.089        | 2.6 |  |
| 579 | p.Ala704Val | A675V | rs756018163  | <b>0.663</b> | 0.8 |  |
| 580 | p.Arg705Gly | R676G | rs2029956646 | 0.006        | 0.0 |  |
| 581 | p.Arg705Lys | R676K | rs2029956870 | 0.003        | 0.4 |  |
| 582 | p.Lys706Arg | K677R | rs777673950  | 0.000        | 0.4 |  |
| 583 | p.Asp708Asn | D679N | rs1303374381 | <b>0.990</b> | 0.4 |  |
| 584 | p.Asn710Ser | N681S | rs770923059  | 0.000        | 1.7 |  |
| 585 | p.Gln711His | Q682H | rs2029958548 | 0.000        | 0.4 |  |
| 586 | p.Asn714Lys | N685K | rs778987310  | 0.012        | 0.8 |  |
| 587 | p.Thr716Ala | T687A | rs745422986  | 0.012        | 2.4 |  |
| 588 | p.Ile717Met | I688M | rs771585066  | 0.001        | 0.8 |  |
| 589 | p.Lys718Arg | K689R | rs1316503803 | 0.286        | 0.7 |  |
| 590 | p.Arg719Trp | R690W | rs200649158  | <b>1.000</b> | 5.6 |  |
| 591 | p.Arg719Gln | R690Q | rs371010069  | <b>0.995</b> | 2.4 |  |
| 592 | p.Ile721Val | I692V | rs769028657  | 0.006        | 0.4 |  |
| 593 | p.Ile721Met | I692M | rs1424703433 | 0.023        | 0.7 |  |
| 594 | p.Lys722Asn | K693N | rs188993222  | 0.123        | 0.8 |  |
| 595 | p.Gln725Glu | Q696E | rs139263584  | 0.393        | 1.2 |  |
| 596 | p.Gln725His | Q696H | rs2029962852 | <b>0.904</b> | 0.8 |  |
| 597 | p.Asp726Val | D697V | rs1420953232 | <b>0.946</b> | 0.4 |  |
| 598 | p.Leu727Arg | L698R | rs2029963533 | <b>0.696</b> | 6.0 |  |
| 599 | p.Arg729Trp | R700W | rs375232467  | <b>1.000</b> | 1.6 |  |
| 600 | p.Arg729Gln | R700Q | rs201527082  | <b>0.994</b> | 2.4 |  |
| 601 | p.Ala730Glu | A701E | rs767880620  | <b>0.999</b> | 8.4 |  |
| 602 | p.Ala730Ser | A701S | rs2029964544 | <b>0.968</b> | 6.0 |  |
| 603 | p.Ala731Val | A702V | rs1374995262 | 0.013        | 7.1 |  |
| 604 | p.Ala734Ser | A705S | rs199785479  | 0.011        | 0.8 |  |
| 605 | p.Leu737Gln | L708Q | rs757100327  | <b>0.999</b> | 0.4 |  |
| 606 | p.Glu738Val | E709V | rs1334538300 | 0.048        | 0.7 |  |
| 607 | p.Asn741Lys | N712K | rs779433192  | <b>0.996</b> | 0.4 |  |
| 608 | p.Lys742Glu | K713E | rs2029992650 | 0.001        | 0.7 |  |
| 609 | p.Lys742Arg | K713R | rs2029992890 | 0.001        | 0.7 |  |
| 610 | p.Ile743Met | I714M | rs1401450584 | <b>0.846</b> | 0.4 |  |
| 611 | p.Met747Thr | M718T | rs2029994732 | <b>0.997</b> | 6.0 |  |
| 612 | p.Glu748Lys | E719K | rs921762904  | <b>0.999</b> | 0.4 |  |
| 613 | p.Glu748Gly | E719G | rs1362206431 | <b>1.000</b> | 0.7 |  |
| 614 | p.Thr749Pro | T720P | rs1599146760 | <b>0.911</b> | 1.4 |  |
| 615 | p.Thr750Ile | T721I | rs2029996149 | 0.005        | 0.7 |  |
| 616 | p.Ser752Ile | S723I | rs2029996374 | <b>0.929</b> | 0.4 |  |
| 617 | p.Val753Met | V724M | rs140129129  | 0.075        | 4.3 |  |
| 618 | p.Ala754Pro | A725P | rs1202344569 | <b>0.943</b> | 0.7 |  |
| 619 | p.Ala754Val | A725V | rs1319509042 | <b>0.830</b> | 1.4 |  |
| 620 | p.Thr755Ile | T726I | rs200503880  | 0.095        | 0.4 |  |
| 621 | p.Thr755Ala | T726A | rs2029998101 | 0.002        | 5.0 |  |
| 622 | p.Val756Leu | V727L | rs773578992  | 0.364        | 0.4 |  |
| 623 | p.Val756Ala | V727A | rs377567489  | <b>0.907</b> | 0.7 |  |
| 624 | p.Cys757Tyr | C728Y | rs1232177858 | <b>0.999</b> | 0.8 |  |
| 625 | p.Pro759Ser | P730S | rs1180603936 | 0.000        | 0.7 |  |
| 626 | p.Pro759Gln | P730Q | rs143843660  | 0.001        | 0.8 |  |

Table S2

|     |             |       |              |       |     |  |
|-----|-------------|-------|--------------|-------|-----|--|
| 627 | p.Cys763Tyr | C734Y | rs370481039  | 0.999 | 3.6 |  |
| 628 | p.Leu764Gln | L735Q | rs145819052; | 0.662 | 25  |  |
| 629 | p.Glu767Lys | E738K | rs148995315; | 0.818 | 26  |  |
| 630 | p.Glu767Gly | E738G | rs1421152152 | 0.895 | 1.4 |  |
| 631 | p.Asp769Gly | D740G | rs559834728  | 0.613 | 2.4 |  |
| 632 | p.Leu770Val | L741V | rs374146846  | 0.994 | 1.6 |  |
| 633 | p.Thr771Met | T742M | rs780755664  | 0.918 | 0.8 |  |
| 634 | p.Val773Met | V744M | rs143830698  | 0.018 | 8.4 |  |
| 635 | p.Met774Val | M745V | rs559585445  | 0.408 | 3.2 |  |
| 636 | p.Thr776Met | T747M | rs769940023  | 0.796 | 1.1 |  |
| 637 | p.Thr776Ala | T747A | rs199869667  | 0.043 | 2.8 |  |
| 638 | p.Arg778Trp | R749W | rs745724462  | 0.988 | 2.6 |  |
| 639 | p.Arg778Gln | R749Q | rs771819046  | 0.194 | 2.0 |  |
| 640 | p.Asp782Glu | D753E | rs760477392  | 0.000 | 1.2 |  |
| 641 | p.Leu784Ser | L755S | rs1162307952 | 0.228 | 0.4 |  |
| 642 | p.Trp785Gly | W756G | rs763670346  | 0.666 | 0.8 |  |
| 643 | p.Glu788Lys | E759K | rs761401927  | 0.002 | 9.2 |  |
| 644 | p.Glu788Asp | E759D | rs565463716  | 0.001 | 1.6 |  |
| 645 | p.Gly789Asp | G760D | rs953051570  | 0.618 | 0.4 |  |
| 646 | p.Arg791Gln | R762Q | rs755385604  | 0.996 | 2.0 |  |
| 647 | p.Asp792His | D763H | rs1291650441 | 0.868 | 0.8 |  |
| 648 | p.Lys793Met | K764M | rs748246753  | 0.324 | 0.8 |  |
| 649 | p.Ala794Thr | A765T | rs756178155  | 0.006 | 0.4 |  |
| 650 | p.Ala794Val | A765V | rs373970727  | 0.003 | 2.8 |  |
| 651 | p.Gly795Arg | G766R | rs2030160089 | 1.000 | 0.4 |  |
| 652 | p.Arg796Lys | R767K | rs2030160538 | 0.002 | 12  |  |
| 653 | p.Ala797Thr | A768T | rs1486364002 | 0.001 | 0.4 |  |
| 654 | p.Ala797Val | A768V | rs1455404812 | 0.003 | 0.4 |  |
| 655 | p.Iso798Val | I769V | rs117647476; | 0.004 | 213 |  |
| 656 | p.Leu799Phe | L770F | rs2030162108 | 0.939 | 0.4 |  |
| 657 | p.Leu799Pro | L770P | rs2030162361 | 0.939 | 1.1 |  |
| 658 | p.Gln800His | Q771H | rs567706604  | 0.003 | 1.2 |  |
| 659 | p.Pro803Leu | P774L | rs367822781  | 0.913 | 6.4 |  |
| 660 | p.Val806Met | V777M | rs769397961  | 1.000 | 4.2 |  |
| 661 | p.Leu808Phe | L779F | rs773031583  | 0.087 | 1.4 |  |
| 662 | p.Ile809Val | I780V | rs762647568  | 0.007 | 3.6 |  |
| 663 | p.Asn810Ser | N781S | rs1206246426 | 0.995 | 22  |  |
| 664 | p.Gln811Arg | Q782R | rs1255043434 | 0.017 | 0.7 |  |
| 665 | p.Ala812Val | A783V | rs751806358  | 0.533 | 0.4 |  |
| 666 | p.Arg814Trp | R785W | rs142799747  | 0.007 | 1.2 |  |
| 667 | p.Arg814Gln | R785Q | rs375979946  | 0.001 | 11  |  |
| 668 | p.Leu815Phe | L786F | rs935705219  | 0.967 | 0.7 |  |
| 669 | p.Asn816Ser | N787S | rs777776998  | 0.853 | 1.2 |  |
| 670 | p.Tyr818Phe | Y789F | rs369245002  | 0.015 | 2.0 |  |
| 671 | p.Val819Ala | V790A | rs1568043314 | 0.002 | 0.8 |  |
| 672 | p.Asp820Asn | D791N | rs1018632632 | 0.784 | 1.2 |  |
| 673 | p.Ala821Val | A792V | rs781086412  | 0.232 | 0.4 |  |
| 674 | p.Ala821Ser | A792S | rs2030182044 | 0.246 | 0.8 |  |
| 675 | p.Gly822Glu | G793E | rs1340223445 | 0.986 | 1.1 |  |
| 676 | p.Asp823Asn | D794N | rs995556379  | 0.609 | 0.4 |  |
| 677 | p.Asp823Val | D794V | rs777851729  | 0.032 | 2.8 |  |
| 678 | p.Ser824Pro | S795P | rs2030184043 | 0.870 | 0.4 |  |
| 679 | p.Ser827Cys | S798C | rs200757344  | 0.864 | 0.8 |  |
| 680 | p.Met828Val | M799V | rs890006891  | 0.001 | 0.4 |  |
| 681 | p.Met828Thr | M799T | rs13306091   | 0.072 | 8.0 |  |

Table S2

|     |             |       |               |       |     |        |
|-----|-------------|-------|---------------|-------|-----|--------|
| 682 | p.Glu830Lys | E801K | rs267604983   | 0.508 | 0.8 |        |
| 683 | p.Thr831Ile | T802I | rs777098855   | 0.482 | 0.4 |        |
| 684 | p.Pro832Leu | P803L | rs761838241   | 0.752 | 0.4 |        |
| 685 | p.Ser833Phe | S804F | rs1568043397  | 0.006 | 0.4 |        |
| 686 | p.Glu835Gly | E806G | rs2030188578  | 0.998 | 0.4 |        |
| 687 | p.Gln836Pro | Q807P | rs1599149424  | 0.006 | 50  | Korean |
| 688 | p.Leu838Val | L809V | rs2030189487  | 0.073 | 0.4 |        |
| 689 | p.Arg840Trp | R811W | rs3730036     | 0.612 | 281 |        |
| 690 | p.Arg840Gln | R811Q | rs767425642   | 0.002 | 3.2 |        |
| 691 | p.Leu841Phe | L812F | rs2030190997  | 0.293 | 0.4 |        |
| 692 | p.Phe842Ser | F813S | rs537201274   | 0.365 | 0.4 |        |
| 693 | p.Gln843Pro | Q814P | rs1314869920  | 0.239 | 0.8 |        |
| 694 | p.Leu848Val | L819V | rs1263864253  | 0.968 | 0.8 |        |
| 695 | p.Tyr849Cys | Y820C | rs2030193846  | 0.998 | 0.4 |        |
| 696 | p.Asn851His | N822H | rs1599149517  | 0.674 | 110 | Korean |
| 697 | p.His853Tyr | H824Y | rs377172559   | 0.999 | 0.4 |        |
| 698 | p.Ala854Asp | A825D | rs1258657289  | 0.999 | 0.4 |        |
| 699 | p.Ala854Thr | A825T | rs2030195429  | 0.999 | 0.4 |        |
| 700 | p.Tyr855Cys | Y826C | rs1290778035  | 0.997 | 3.0 |        |
| 701 | p.Val856Met | V827M | rs369111551   | 0.936 | 2.8 |        |
| 702 | p.Arg857His | R828H | rs146089353;  | 1.000 | 3.2 | Low    |
| 703 | p.Arg857Cys | R828C | rs989791368   | 1.000 | 0.8 |        |
| 704 | p.Arg858Gln | R829Q | rs765246562   | 0.997 | 12  |        |
| 705 | p.Arg858Trp | R829W | rs762333619   | 1.000 | 1.2 |        |
| 706 | p.Ala859Thr | A830T | rs1474446784  | 0.672 | 0.4 |        |
| 707 | p.Leu860Val | L831V | rs1164595381  | 0.994 | 0.4 |        |
| 708 | p.Leu860Pro | L831P | rs773277069   | 1.000 | 1.7 |        |
| 709 | p.His861Tyr | H832Y | rs140056206;  | 0.006 | 5.6 |        |
| 710 | p.Arg862Cys | R833C | rs751363862   | 0.850 | 1.6 |        |
| 711 | p.Arg862His | R833H | rs756018518   | 0.010 | 3.6 |        |
| 712 | p.Gly865Arg | G836R | rs939884644   | 1.000 | 2.0 |        |
| 713 | p.Ala866Ser | A837S | rs1037068942  | 0.004 | 1.5 |        |
| 714 | p.His868Gln | H839Q | rs753727679   | 0.106 | 0.0 |        |
| 715 | p.Ile869Val | I840V | rs757164151   | 0.013 | 0.8 |        |
| 716 | p.Leu871Gln | L842Q | rs1272138201  | 0.999 | 0.4 |        |
| 717 | p.Pro876Ser | P847S | rs757874491   | 0.999 | 1.2 |        |
| 718 | p.Ala877Gly | A848G | rs931392712   | 0.996 | 0.4 |        |
| 719 | p.His878Gln | H849Q | rs200196657   | 0.985 | 1.2 |        |
| 720 | p.Gly881Glu | G852E | rs1232536510  | 1.000 | 0.8 |        |
| 721 | p.Asn882Ser | N853S | rs771162255   | 0.997 | 0.8 |        |
| 722 | p.Met883Val | M854V | rs774518339   | 0.994 | 0.4 |        |
| 723 | p.Met883Thr | M854T | rs1267969615; | 1.000 | 0.4 |        |
| 724 | p.Met883Ile | M854L | rs759679121   | 0.996 | 4.1 |        |
| 725 | p.Tyr884Arg | Y855R | rs568842388   | 1.000 | 3.6 |        |
| 726 | p.Ala885Pro | A856P | rs1173972262  | 0.071 | 0.4 |        |
| 727 | p.Ala885Val | A856V | rs1251602237  | 0.803 | 0.4 |        |
| 728 | p.Thr887Ala | T858A | rs1181835738  | 0.157 | 1.1 |        |
| 729 | p.Thr887Asn | T858N | rs761719023   | 0.752 | 0.4 |        |
| 730 | p.Trp888Ser | W859S | rs1468320560  | 1.000 | 0.4 |        |
| 731 | p.Trp888Cys | W859C | rs1157631466  | 1.000 | 0.4 |        |
| 732 | p.Tyr892Cys | Y863C | rs750406199   | 0.993 | 0.4 |        |
| 733 | p.Val895Leu | V866L | rs1393589215  | 0.048 | 0.4 |        |
| 734 | p.Val896Met | V867M | rs145422285   | 0.039 | 0.4 |        |
| 735 | p.Pro899Leu | P870L | rs2030335337  | 0.984 | 0.4 |        |
| 736 | p.Ala901Ser | A872S | rs752266791   | 0.561 | 2.4 |        |

Table S2

|     |             |       |              |       |     |  |
|-----|-------------|-------|--------------|-------|-----|--|
| 737 | p.Ser903Trp | S874W | rs558504919  | 0.429 | 3.4 |  |
| 738 | p.Met904Thr | M875T | rs779560946  | 0.029 | 0.4 |  |
| 739 | p.Asp905Gly | D876G | rs745987517  | 0.973 | 1.1 |  |
| 740 | p.Thr906Ala | T877A | rs1274588146 | 0.000 | 0.7 |  |
| 741 | p.Thr906Ile | T877I | rs772024137  | 0.007 | 0.8 |  |
| 742 | p.Glu908Lys | E879K | rs747159428  | 0.117 | 2.0 |  |
| 743 | p.Ala909Ser | A880S | rs1290624816 | 0.126 | 0.4 |  |
| 744 | p.Lys912Arg | K883R | rs1329922107 | 0.002 | 2.1 |  |
| 745 | p.Gln913Glu | Q884E | rs372614913  | 0.092 | 0.4 |  |
| 746 | p.Gln913Arg | Q884R | rs1026599078 | 0.008 | 2.4 |  |
| 747 | p.Gly914Asp | G885D | rs1362563545 | 0.481 | 0.4 |  |
| 748 | p.Trp915Ser | W886S | rs1271898535 | 0.989 | 0.7 |  |
| 749 | p.Thr916Ala | T887A | rs755053417  | 0.422 | 0.4 |  |
| 750 | p.Thr916Met | T887M | rs730043     | 0.969 | 397 |  |
| 751 | p.Pro917Ala | P888A | rs748317639  | 0.070 | 0.4 |  |
| 752 | p.Pro917Arg | P888R | rs770741758  | 0.989 | 0.8 |  |
| 753 | p.Met920Thr | M891T | rs745827618  | 0.948 | 0.4 |  |
| 754 | p.Lys922Glu | K893E | rs551723440  | 0.000 | 0.4 |  |
| 755 | p.Ser930Phe | S901F | rs1231385013 | 1.000 | 0.4 |  |
| 756 | p.Leu931Pro | L902P | rs1317192622 | 1.000 | 0.4 |  |
| 757 | p.Gly932Arg | G903R | rs1335323894 | 1.000 | 2.1 |  |
| 758 | p.Gly932Ala | G903A | rs768235439  | 0.998 | 0.4 |  |
| 759 | p.Pro935Ser | P906S | rs199555061  | 0.922 | 1.2 |  |
| 760 | p.Pro935Leu | P906L | rs537884559  | 0.984 | 8.0 |  |
| 761 | p.Val936Met | V907M | rs752081336  | 0.036 | 2.4 |  |
| 762 | p.Glu939Gln | E910Q | rs755034079  | 0.382 | 0.7 |  |
| 763 | p.Trp941Arg | W912R | rs375020796  | 1.000 | 0.4 |  |
| 764 | p.Trp941Cys | W912C | rs1202055050 | 0.999 | 0.4 |  |
| 765 | p.Asn942His | N913H | rs1290388486 | 0.000 | 0.4 |  |
| 766 | p.Asn942Lys | N913K | rs201517271  | 0.003 | 0.4 |  |
| 767 | p.Asn942Ser | N913S | rs2030363936 | 0.000 | 0.4 |  |
| 768 | p.Lys943Arg | K914R | rs777955033  | 0.492 | 0.8 |  |
| 769 | p.Lys943Asn | K914N | rs1456982290 | 0.724 | 0.4 |  |
| 770 | p.Leu946Val | L917V | rs1397259349 | 0.198 | 0.4 |  |
| 771 | p.Glu947Lys | E918K | rs201076681  | 0.902 | 1.6 |  |
| 772 | p.Pro949Ser | P920S | rs779881202  | 0.999 | 0.4 |  |
| 773 | p.Asp951Tyr | D922Y | rs776223808  | 0.992 | 0.8 |  |
| 774 | p.Gly952Arg | G923R | rs987787902  | 0.993 | 3.0 |  |
| 775 | p.Arg953Trp | R924W | rs772888815  | 1.000 | 1.2 |  |
| 776 | p.Cys957Arg | C928R | rs759966983  | 0.999 | 0.4 |  |
| 777 | p.Cys957Ser | C928S | rs767594429  | 0.994 | 0.4 |  |
| 778 | p.Ala959Thr | A930T | rs756159839  | 0.810 | 0.8 |  |
| 779 | p.Ala959Asp | A930D | rs764275894  | 0.890 | 0.8 |  |
| 780 | p.Ser960Leu | S931L | rs1420430019 | 0.999 | 1.6 |  |
| 781 | p.Ala961Pro | A932P | rs779833433  | 0.999 | 2.8 |  |
| 782 | p.Asn966Asp | N937D | rs746934582  | 0.997 | 0.4 |  |
| 783 | p.Gly967Ser | G938S | rs937878555  | 0.967 | 1.6 |  |
| 784 | p.Asp969Tyr | D940Y | rs913463914  | 0.999 | 2.1 |  |
| 785 | p.Phe970Cys | F941C | rs2030374256 | 1.000 | 0.4 |  |
| 786 | p.Arg971Trp | R942W | rs769406157  | 1.000 | 2.4 |  |
| 787 | p.Arg971Gln | R942Q | rs554004241  | 0.998 | 8.0 |  |
| 788 | p.Ile972Val | I943V | rs2030513571 | 0.970 | 0.8 |  |
| 789 | p.Ile972Thr | I943T | rs2030513778 | 0.999 | 0.4 |  |
| 790 | p.Gln974Arg | Q945R | rs375442845  | 0.995 | 0.4 |  |
| 791 | p.Cys975Gly | C946G | rs1318768216 | 1.000 | 0.4 |  |

Table S2

|     |              |        |              |       |     |        |
|-----|--------------|--------|--------------|-------|-----|--------|
| 792 | p.Cys975Tyr  | C946Y  | rs1346738730 | 1.000 | 0.4 |        |
| 793 | p.Thr977Ile  | T948I  | rs1439040577 | 0.006 | 1.1 |        |
| 794 | p.Val978Met  | V949M  | rs141750591  | 0.993 | 26  |        |
| 795 | p.Leu980Ser  | L951S  | rs2030516614 | 0.266 | 0.4 |        |
| 796 | p.Val985Met  | V956M  | rs2030518300 | 0.568 | 0.7 |        |
| 797 | p.Ala986Pro  | A957P  | rs1218838386 | 0.492 | 330 | Korean |
| 798 | p.His987Tyr  | H958Y  | rs1285477249 | 0.999 | 1.2 |        |
| 799 | p.His988Arg  | H959R  | rs1315238107 | 0.792 | 0.4 |        |
| 800 | p.Glu989Lys  | E960K  | rs752685131  | 1.000 | 1.2 |        |
| 801 | p.Met990Arg  | M961M  | rs1468555557 | 0.601 | 0.4 |        |
| 802 | p.Met990Ile  | M961I  | rs1227030637 | 0.005 | 0.8 |        |
| 803 | p.Gly991Ser  | G962S  | rs756019276  | 1.000 | 0.4 |        |
| 804 | p.His992Asp  | H963D  | rs1244440863 | 1.000 | 1.2 |        |
| 805 | p.His992Arg  | H963R  | rs771384705  | 0.999 | 0.8 |        |
| 806 | p.Ile993Val  | I964V  | rs753450698  | 0.003 | 1.4 |        |
| 807 | p.Gln994Arg  | Q965R  | rs2030522217 | 0.995 | 0.4 |        |
| 808 | p.Tyr995His  | Y966H  | rs778562737  | 0.999 | 0.4 |        |
| 809 | p.Phe996Ser  | F967S  | rs2030522633 | 0.997 | 0.7 |        |
| 810 | p.Met997Val  | M968V  | rs745486055  | 0.341 | 1.1 |        |
| 811 | p.Met997Ile  | M968I  | rs1395070641 | 0.341 | 0.4 |        |
| 812 | p.Gln998Lys  | Q969K  | rs772433710  | 0.991 | 0.4 |        |
| 813 | p.Tyr999Cys  | Y970C  | rs1325658187 | 1.000 | 0.4 |        |
| 814 | p.Pro1003Leu | P974L  | rs377280373  | 0.909 | 2.4 |        |
| 815 | p.Arg1007Lys | R978K  | rs747362596  | 0.999 | 0.4 |        |
| 816 | p.Gly1009Val | G980V  | rs769272334  | 0.994 | 2.9 |        |
| 817 | p.Ala1010Gly | A981G  | rs1740970700 | 0.992 | 0.7 |        |
| 818 | p.Gly1013Ser | G984S  | rs571848794; | 1.000 | 6.8 |        |
| 819 | p.Gly1013Ala | G984A  | rs540734174  | 1.000 | 0.8 |        |
| 820 | p.His1015Tyr | H986Y  | rs2030527371 | 0.999 | 0.4 |        |
| 821 | p.His1015Arg | H986R  | rs773600140  | 0.999 | 1.6 |        |
| 822 | p.His1015Gln | H986Q  | rs144751624  | 0.999 | 19  |        |
| 823 | p.Glu1016Gly | E987G  | rs2030528115 | 1.000 | 0.4 |        |
| 824 | p.Ala1017Thr | A988T  | rs1471502216 | 0.999 | 0.4 |        |
| 825 | p.Ile1018Val | I989V  | rs2030528735 | 0.215 | 0.7 |        |
| 826 | p.Ile1018Thr | I989T  | rs4976; (7)  | 0.988 | 143 |        |
| 827 | p.Gly1019Arg | G990R  | rs1418273122 | 1.000 | 0.4 |        |
| 828 | p.Asp1020Gly | D991G  | rs1200211350 | 1.000 | 3.2 |        |
| 829 | p.Val1021Met | V992M  | rs764129854  | 0.977 | 3.2 |        |
| 830 | p.Leu1024Phe | L995F  | rs753672462  | 1.000 | 1.6 |        |
| 831 | p.Ser1025Ala | S996A  | rs1489092015 | 0.997 | 0.7 |        |
| 832 | p.Val1026Met | V997M  | rs377550847  | 0.998 | 1.2 |        |
| 833 | p.Val1026Ala | V997A  | rs1372691116 | 0.886 | 0.4 |        |
| 834 | p.Ser1027Cys | S998C  | rs2030532177 | 0.980 | 0.7 |        |
| 835 | p.Thr1028Met | T999M  | rs778331848  | 1.000 | 2.9 |        |
| 836 | p.Pro1029Ser | P1000S | rs758105347  | 0.999 | 0.4 |        |
| 837 | p.Lys1030Asn | K1001N | rs374679629  | 0.561 | 1.2 |        |
| 838 | p.His1033Pro | H1004P | rs747442787  | 0.437 | 0.8 |        |
| 839 | p.Asp1036Lys | N1007K | rs142947404; | 0.041 | 71  |        |
| 840 | p.Leu1037Pro | L1008P | rs1258035065 | 1.000 | 0.4 |        |
| 841 | p.Ser1039Asn | S1010N | rs1368193999 | 0.011 | 0.8 |        |
| 842 | p.Ser1039Arg | S1010R | rs2030536211 | 0.034 | 0.4 |        |
| 843 | p.Ser1040Thr | S1011T | rs749362077  | 0.000 | 0.4 |        |
| 844 | p.Glu1041Asp | E1012D | rs771342124  | 0.000 | 1.1 |        |
| 845 | p.Gly1043Ser | G1014S | rs2030536853 | 0.001 | 0.7 |        |
| 846 | p.Gly1043Val | G1014V | rs1599154510 | 0.002 | 0.7 |        |



Table S2

|     |              |         |               |       |     |         |
|-----|--------------|---------|---------------|-------|-----|---------|
| 847 | p.Asp1045His | D1016H  | rs140980792   | 0.001 | 4.8 |         |
| 848 | p.Asp1045Glu | D1016E  | rs200011052   | 0.000 | 0.8 |         |
| 849 | p.Glu1046Lys | E1017K  | rs761601299   | 0.996 | 0.4 |         |
| 850 | p.Asp1048Gly | D1019G  | rs1313627969  | 0.509 | 0.8 |         |
| 851 | p.Ile1049Val | I1020V  | rs765835019   | 0.984 | 0.8 |         |
| 852 | p.Asn1050Asp | N1021D  | rs751226904   | 0.998 | 0.4 |         |
| 853 | p.Asn1050Ser | N1021S  | rs935304784   | 0.994 | 1.5 |         |
| 854 | p.Leu1052Val | L1023V  | rs989584821   | 0.988 | 0.4 |         |
| 855 | p.Leu1052Pro | L1023PV | rs1351048530  | 1.000 | 0.4 |         |
| 856 | p.Met1055Leu | M1026L  | rs144926742   | 0.065 | 4.4 |         |
| 857 | p.Met1055Thr | M1026T  | rs1568046795  | 0.962 | 0.4 |         |
| 858 | p.Met1055Iso | M1026I  | rs767184799   | 0.017 | 0.4 |         |
| 859 | p.Alal056Thr | A1027T  | rs569898686   | 0.999 | 0.4 |         |
| 860 | p.Asp1058Asn | D1029N  | rs1197014458  | 0.830 | 0.4 |         |
| 861 | p.Asp1058Gly | D1029G  | rs1458584759  | 0.916 | 0.7 |         |
| 862 | p.Iso1060Val | I1031V  | rs1458035301  | 0.021 | 1.6 |         |
| 863 | p.Alal061Thr | A1032T  | rs773695336   | 0.057 | 4.2 |         |
| 864 | p.Phe1062Leu | F1033L  | rs778802598   | 0.998 | 0.8 |         |
| 865 | p.Pro1064Leu | P1035L  | rs1384728709  | 0.671 | 1.5 |         |
| 866 | p.Tyr1067His | Y1038H  | rs1342469069  | 0.990 | 1.1 |         |
| 867 | p.Tyr1067Cys | Y1038C  | rs1382876528  | 0.992 | 0.7 |         |
| 868 | p.Val1069Iso | V1040I  | rs147763588   | 0.002 | 2.4 |         |
| 869 | p.Val1069Ala | V1040A  | rs1322398043  | 0.422 | 3.2 |         |
| 870 | p.Asp1070Asn | D1041N  | rs571910640   | 1.000 | 4.0 |         |
| 871 | p.Gln1071Lys | Q1042K  | rs769531227   | 0.444 | 0.4 |         |
| 872 | p.Arg1073Cys | R1044C  | rs762807750   | 1.000 | 1.6 |         |
| 873 | p.Arg1073His | R1044H  | rs141139841   | 0.999 | 0.8 |         |
| 874 | p.Val1076Leu | V1047L  | rs534480370   | 0.995 | 17  |         |
| 875 | p.Asp1078Asn | D1049N  | rs2030566841  | 0.338 | 18  | Japan   |
| 876 | p.Asp1078Gly | D1049G  | rs375039288   | 0.946 | 2.4 |         |
| 877 | p.Gly1079Glu | G1050E  | rs752369560   | 0.856 | 0.8 |         |
| 878 | p.Ser1080Cys | S1051C  | rs1472584106  | 0.778 | 0.4 |         |
| 879 | p.Ser1080Asn | S1051N  | rs1166034708  | 0.111 | 0.8 |         |
| 880 | p.Iso1081Val | I1052V  | rs761139845   | 0.014 | 0.8 |         |
| 881 | p.Iso1081Asn | I1052N  | rs2030568517  | 0.994 | 0.4 |         |
| 882 | p.Glu1084Lys | E1055K  | rs1455896148  | 0.012 | 0.8 |         |
| 883 | p.Glu1084Asp | E1055D  | rs2030568933  | 0.001 | 0.4 |         |
| 884 | p.Gln1088His | Q1059H  | rs764489358   | 0.874 | 0.8 |         |
| 885 | p.Trp1091Arg | W1062R  | rs2030569963  | 1.000 | 0.7 |         |
| 886 | p.Ser1092Gly | S1063G  | rs2030570388  | 0.082 | 0.7 |         |
| 887 | p.Arg1094Gly | R1065G  | rs754412363   | 1.000 | 1.2 |         |
| 888 | p.Gln1098Arg | Q1069R  | rs1568047250; | 1.000 | 1.6 | 36 (17) |
| 889 | p.Pro1102Thr | P1073T  | rs145349565   | 0.989 | 69  |         |
| 890 | p.Pro1103Thr | P1074T  | rs745776314   | 1.000 | 5.6 |         |
| 891 | p.Val1104Ala | V1075A  | rs1458829834  | 0.040 | 0.7 |         |
| 892 | p.Arg1106Ser | R1077S  | rs2030598589  | 1.000 | 0.4 |         |
| 893 | p.Gln1108Arg | Q1079R  | rs2030599332  | 0.006 | 0.7 |         |
| 894 | p.Gly1109Val | G1080V  | rs768468260   | 0.476 | 0.7 |         |
| 895 | p.Phe1111Leu | F1082L  | rs1465879181  | 0.996 | 0.4 |         |
| 896 | p.Asp1112Gly | D1083G  | rs1568047328  | 1.000 | 0.4 |         |
| 897 | p.Asp1112Glu | D1083E  | rs762107963   | 0.994 | 0.8 |         |
| 898 | p.Alal115Asp | A1086D  | rs565263717   | 0.887 | 0.8 |         |
| 899 | p.His1118Tyr | H1089Y  | rs1192509168  | 0.999 | 0.4 |         |
| 900 | p.Val1123Met | V1094M  | rs373319603   | 0.987 | 1.2 |         |
| 901 | p.Pro1124Thr | P1096T  | rs1455545095  | 1.000 | 0.4 |         |

Table S2

|     |              |        |                      |       |           |  |
|-----|--------------|--------|----------------------|-------|-----------|--|
| 902 | p.Iso1126Leu | I1097L | rs567659245          | 0.022 | <b>11</b> |  |
| 903 | p.Iso1126Ser | I1097S | rs2030603816         | 0.974 | 0.4       |  |
| 904 | p.Arg1127Ser | R1098S | rs1229959665         | 0.999 | 0.7       |  |
| 905 | p.Tyr1128Cys | Y1099C | rs1481913226         | 1.000 | 0.4       |  |
| 906 | p.Val1130Iso | V1101I | rs575830312          | 0.031 | 2.4       |  |
| 907 | p.Val1130Ala | V1101A | rs2030731929         | 0.877 | 0.4       |  |
| 908 | p.Ser1131Pro | S1102P | rs777258874          | 0.998 | 0.4       |  |
| 909 | p.Ser1131Gly | S1102G | rs2030732506         | 0.091 | 0.8       |  |
| 910 | p.Phe1132Leu | F1123L | rs1308790992         | 0.997 | 0.8       |  |
| 911 | p.Gln1135Lys | Q1106K | rs749711522;<br>(15) | 0.995 | 4.0       |  |
| 912 | p.Gln1135Arg | Q1106R | rs771232505          | 0.998 | 0.4       |  |
| 913 | p.Gln1137Arg | Q1108R | rs1895643705         | 1.000 | 0.4       |  |
| 914 | p.His1139Tyr | H1110Y | rs1281978641         | 0.993 | 0.8       |  |
| 915 | p.Glu1140Lys | E1111K | rs1228691156         | 0.011 | 1.2       |  |
| 916 | p.Gln1144Pro | Q1115P | rs775709106          | 0.063 | 0.4       |  |
| 917 | p.Ala1145Val | A1116V | rs1444132860         | 0.032 | 0.4       |  |
| 918 | p.Ala1146Pro | A1117P | rs2030736169         | 0.998 | 0.4       |  |
| 919 | p.His1148Tyr | H1119Y | rs1246627721         | 0.900 | 0.7       |  |
| 920 | p.Thr1149Met | T1120M | rs764430271          | 0.439 | 3.2       |  |
| 921 | p.Gly1150Ala | G1121A | rs762872915          | 0.439 | 1.2       |  |
| 922 | p.Pro1151Leu | P1122L | rs1460629643         | 0.680 | 0.7       |  |
| 923 | p.His1153Gln | H1124Q | rs1167765854         | 0.899 | 0.4       |  |
| 924 | p.Cys1155Tyr | C1126Y | rs1319412351         | 0.999 | 1.9       |  |
| 925 | p.Asp1156Arg | D1127R | rs751557067          | 0.998 | 0.4       |  |
| 926 | p.Ile1157Thr | I1128T | rs1215104945         | 0.999 | 2.4       |  |
| 927 | p.Ser1160Phe | S1131F | rs1435131111         | 1.000 | 0.4       |  |
| 928 | p.Glu1162Asp | E1133D | rs2030740252         | 0.006 | 0.4       |  |
| 929 | p.Ala1163Ser | A1134S | rs1299150514         | 0.998 | 1.2       |  |
| 930 | p.Gly1164Arg | G1135R | rs145579007          | 1.000 | <b>10</b> |  |
| 931 | p.Arg1166Cys | R1137C | rs777499791          | 0.456 | 1.2       |  |
| 932 | p.Arg1166His | R1137H | rs201126192          | 0.273 | 8.0       |  |
| 933 | p.Leu1167Val | L1138V | rs1227093005         | 0.994 | 1.4       |  |
| 934 | p.Leu1167Pro | L1138P | rs2030743196         | 1.000 | 0.4       |  |
| 935 | p.Ala1168Thr | A1139T | rs771285769          | 0.439 | 0.4       |  |
| 936 | p.Ala1168Val | A1139V | rs993733529          | 0.647 | 0.7       |  |
| 937 | p.Ala1170Thr | A1141T | rs747412511          | 0.756 | 0.8       |  |
| 938 | p.Ala1170Val | A1141V | rs2030766252         | 0.058 | 0.7       |  |
| 939 | p.Met1171Leu | M1142L | rs776634959          | 0.018 | 0.4       |  |
| 940 | p.Gly1174Asp | G1145D | rs1458534207         | 1.000 | 1.1       |  |
| 941 | p.Arg1177Ser | R1177S | rs1385800001         | 0.036 | 0.8       |  |
| 942 | p.Pro1178Leu | P1149L | rs538659872          | 0.836 | 1.6       |  |
| 943 | p.Pro1180Ala | P1151A | rs767177049          | 0.995 | 2.0       |  |
| 944 | p.Pro1180Leu | P1151L | rs775501006          | 1.000 | 5.6       |  |
| 945 | p.Met1183Val | M1154V | rs376826294          | 0.957 | 0.8       |  |
| 946 | p.Met1183Thr | M1154T | rs753388395          | 0.634 | 0.4       |  |
| 947 | p.Met1183Ile | M1154I | rs756739847          | 0.998 | 0.4       |  |
| 948 | p.Iso1186Met | I1157M | rs764893306          | 0.059 | 0.8       |  |
| 949 | p.Thr1187Met | T1158M | rs12709442           | 1.000 | <b>76</b> |  |
| 950 | p.Gln1189Arg | Q1160R | rs1210452594         | 0.995 | 0.8       |  |

Table S2

|     |              |               |                        |              |                  |                    |
|-----|--------------|---------------|------------------------|--------------|------------------|--------------------|
| 951 | p.Pro1190Ser | P1161S        | rs1295931503           | 0.028        | 1.9              |                    |
| 952 | p.Pro1190Leu | P1161L        | rs1264163829           | <b>0.663</b> | 0.7              |                    |
| 953 | p.Met1192Val | M1163V        | rs2030771924           | <b>0.654</b> | 6.0              |                    |
| 954 | p.Ser1193Asn | S1164N        | rs780228220            | <b>0.996</b> | 1.6              |                    |
| 955 | p.Alal194Thr | A1165T        | rs755506668            | <b>0.898</b> | 0.8              |                    |
| 956 | p.Alal194Asp | A1165D        | rs777388821            | <b>0.982</b> | 0.4              |                    |
| 957 | p.Ser1195Pro | S1166P        | rs1343107612           | 0.092        | 0.4              |                    |
| 958 | p.Ser1195Leu | S1166L        | rs748284095            | 0.004        | 2.4              |                    |
| 959 | p.Alal196Thr | A1167T        | rs773596097            | 0.433        | 0.4              |                    |
| 960 | p.Met1197Val | M1168V        | rs201870045            | 0.016        | 1.2              |                    |
| 961 | p.Phe1201Leu | F1172L        | rs775204602            | <b>0.998</b> | 0.4              |                    |
| 962 | p.Pro1203Leu | P1174L        | rs369760270            | <b>1.000</b> | 1.6              |                    |
| 963 | p.Asp1206Tyr | D1177Y        | rs2030775874           | <b>0.871</b> | 0.4              |                    |
| 964 | p.Asp1206Ala | D1177A        | rs1291258688           | 0.164        | 0.8              |                    |
| 965 | p.Arg1209Pro | <b>R1180P</b> | rs5381166970;<br>(1,4) | 0.358        | 1.6              | Low                |
| 966 | p.Arg1209His | R1180H        |                        | 0.240        |                  |                    |
| 967 | p.Arg1209Cys | R1180C        | rs1353694784           | 0.414        | 0.8              |                    |
| 968 | p.Thr1210Met | T1181M        | rs12720742             | 0.421        | <b>106</b>       |                    |
| 969 | p.Glu1211Lys | E1182K        | rs766053859            | 0.116        | 0.9              |                    |
| 970 | p.Glu1211Val | E1182V        | rs1568049110           | <b>0.880</b> | 0.4              |                    |
| 971 | p.Asn1212Asp | N1183D        | rs996589954            | <b>0.999</b> | 1.4              |                    |
| 972 | p.Asn1212Thr | N1183T        | rs574717474            | <b>1.000</b> | 2.4              |                    |
| 973 | p.Glu1213Lys | E1184K        | rs149590791            | 0.001        | 0.4              |                    |
| 974 | p.Glu1213Ala | E1184A        | rs2030780027           | 0.001        | 0.7              |                    |
| 975 | p.Leu1214Pro | L1185P        | rs1451027689           | 0.058        | 1.1              |                    |
| 976 | p.His1215Arg | H1186R        | rs757974064            | 0.040        | 0.4              |                    |
| 977 | p.His1215Gln | H1186Q        | rs144312383            | 0.003        | 6.0              |                    |
| 978 | p.Gly1216Arg | G1187R        | rs2030781426           | <b>0.699</b> | 0.4              |                    |
| 979 | p.Glu1217Asp | E1188S        | rs1248102885           | 0.048        | 0.4              |                    |
| 980 | p.Lys1218Gln | K1189Q        | rs2030782089           | 0.001        | 0.4              |                    |
| 981 | p.Lys1218Arg | K1189R        | rs2030782285           | 0.023        | 0.4              |                    |
| 982 | p.Leu1219Pro | L1190P        | rs140941300            | <b>0.989</b> | 4.7              |                    |
| 983 | p.Gly1220Ser | G1191S        | rs1418538736           | <b>1.000</b> | 0.4              |                    |
| 984 | p.Pro1222Ser | P1193S        | rs144888208            | <b>0.999</b> | 0.4              |                    |
| 985 | p.Pro1222Leu | P1193L        | rs779175881            | <b>1.000</b> | 2.4              |                    |
| 986 | p.Tyr1224His | Y1195H        | rs776554544            | <b>0.962</b> | 0.4              |                    |
| 987 | p.Asn1225Lys | <b>N1196K</b> | rs1033103629;          | 0.137        | 2.4              | <b>434 (6)</b>     |
| 988 | p.Asn1225Thr | N1196T        | rs761685671            | 0.001        | 0.4              |                    |
| 989 | p.Trp1226Cys | W1197C        | rs769710002            | <b>1.000</b> | 0.4              |                    |
| 990 | p.Thr1227Ala | T1198A        | rs772778762            | 0.000        | 0.8              |                    |
| 991 | p.Thr1227Met | T1198M        | rs762495578            | 0.010        | 4.5              |                    |
| 992 | p.Pro1228Leu | <b>P1199L</b> | rs121912703;           | <b>1.000</b> | 3.7 <sup>d</sup> | <b>425 (6, 18)</b> |
| 993 | p.Asn1229Ser | N1200S        | rs753269825            | 0.000        | 0.4              |                    |
| 994 | p.Ser1230Tyr | S1201Y        | rs756742824            | 0.372        | 2.9              |                    |
| 995 | p.Alal231Thr | A1202T        | rs959741765            | 0.183        | 0.4              |                    |
| 996 | p.Arg1232Cys | R1203C        | rs750545791            | 0.265        | 1.1              |                    |
| 997 | p.Arg1232His | R1203H        | rs372282664;<br>(7)    | 0.001        | 6.9              |                    |
| 998 | p.Ser1233Leu | S1204L        | rs1474601688           | 0.001        | 6.0              |                    |

Table S2

|      |              |        |                        |              |            |  |
|------|--------------|--------|------------------------|--------------|------------|--|
| 999  | p.Pro1236Leu | P1207L | rs751737727            | 0.001        | 0.4        |  |
| 1000 | p.Asp1239Gly | D1210G | rs777561376            | 0.000        | 0.9        |  |
| 1001 | p.Asp1239Glu | D1210E | rs749019292            | 0.000        | 0.4        |  |
| 1002 | p.Gly1241Ser | G1212S | rs367916721            | 0.003        | <b>38</b>  |  |
| 1003 | p.Arg1242Cys | R1213C | rs1226490350           | <b>0.446</b> | 1.4        |  |
| 1004 | p.Arg1242His | R1213H | rs781198085            | 0.374        | 3.5        |  |
| 1005 | p.Val243Ile  | V1214I | rs372416620            | 0.279        | 5.6        |  |
| 1006 | p.Phe1245Leu | F1216L | rs521181910            | 0.039        | 0.4        |  |
| 1007 | p.Gly1247Val | G1218V | rs2030812434           | <b>0.976</b> | 0.4        |  |
| 1008 | p.Asp1249Ala | D1220A | rs777124668            | 0.001        | 0.4        |  |
| 1009 | p.Leu1250Val | L1221V | rs1193002337           | 0.034        | 0.4        |  |
| 1010 | p.Ala1252Val | A1223V | rs762056936            | 0.007        | 0.4        |  |
| 1011 | p.Arg1256Cys | R1227C | rs763049172            | 0.353        | <b>32</b>  |  |
| 1012 | p.Arg1256His | R1227H | rs766377685            | 0.001        | 1.8        |  |
| 1013 | p.Val1257Met | V1228M | rs759857038            | 0.016        | 0.5        |  |
| 1014 | p.Gly1258Ser | G1229S | rs1347084405           | 0.341        | 0.5        |  |
| 1015 | p.Gly1258Asp | G1229D | rs1434928128           | <b>0.888</b> | 0.8        |  |
| 1016 | p.Gln1259Pro | Q1230P | rs756978461            | <b>0.497</b> | 0.5        |  |
| 1017 | p.Gly1266Asp | G1237S | rs778929965            | 0.075        | 5.3        |  |
| 1018 | p.Ala1268Thr | A1239T | rs757997489            | 0.005        | 3.4        |  |
| 1019 | p.Leu1270Pro | L1241P | rs1179455074           | 0.024        | 0.8        |  |
| 1020 | p.Val1271I   | V1242I | rs780690514            | 0.003        | 0.4        |  |
| 1021 | p.Ala1272Thr | A1243T | rs1425238764           | 0.029        | 0.8        |  |
| 1022 | p.Ala1272Gly | A1243G | rs770016471            | <b>0.530</b> | 1.4        |  |
| 1023 | p.Arg1279Gln | R1250Q | rs4980; (7,10)         | 0.002        | <b>410</b> |  |
| 1024 | p.Arg1279Trp | R1250W | rs568401628            | <b>0.451</b> | 4.5        |  |
| 1025 | p.Phe1281Ser | F1252S | rs1393052928           | 0.004        | 0.7        |  |
| 1026 | p.Iso1283Val | I1254V | rs1268051765           | 0.011        | 0.8        |  |
| 1027 | p.Arg1284Cys | R1255C | rs375527470;<br>(7,19) | 0.353        | 5.4        |  |
| 1028 | p.Arg1284His | R1255H | rs1333987355           | 0.001        | 0.7        |  |
| 1029 | p.Arg1286Ser | R1257S | rs4364; (16,19)        | 0.013        | <b>733</b> |  |
| 1030 | p.Arg1286Cys | R1257C |                        | <b>0.733</b> |            |  |
| 1031 | p.Arg1286His | R1257H | rs767828019            | 0.000        | <b>17</b>  |  |
| 1032 | p.Leu1288Phe | L1259F | rs2030824754           | 0.008        | 0.4        |  |
| 1033 | p.His1289Arg | H1260R | rs1004296792           | 0.000        | 1.1        |  |
| 1034 | p.Arg1290Trp | R1261W | rs752812293            | 0.000        | <b>42</b>  |  |
| 1035 | p.Arg1290Gln | R1261Q | rs12720745             | 0.000        | <b>622</b> |  |
| 1036 | p.His1291Pro | H1262P | rs2030827530           | 0.000        | 0.4        |  |
| 1037 | p.His1293Tyr | H1264Y | rs765069550            | 0.027        | 6.0        |  |
| 1038 | p.His1293Gln | H1264Q | rs1013454628           | 0.001        | 4.0        |  |
| 1039 | p.Gly1294Arg | G1265R | rs1422356094           | 0.006        | 0.4        |  |
| 1040 | p.Gly1294Glu | G1265E | rs2030827530           | 0.004        | 0.7        |  |
| 1041 | p.Pro1295Leu | P1266L | rs886053226            | <b>0.466</b> | 0.8        |  |
| 1042 | p.Gln1296Arg | Q1267R | rs4961                 | 0.001        | 0.7        |  |
| 1043 | p.Gly1298Cys | G1269C | rs1024799181           | 0.009        | 2.9        |  |
| 1044 | p.Glu1300Lys | E1271K | rs751134637            | 0.313        | 2.8        |  |
| 1045 | p.Glu1300Gly | E1271G | rs1385347177           | <b>0.725</b> | 0.7        |  |
| 1046 | p.Glu1300Asp | E1271D | rs1244045213           | <b>0.453</b> | 0.8        |  |

Table S2

| <b>III. Combined frequency</b>                          |               |  |
|---------------------------------------------------------|---------------|--|
|                                                         |               |  |
| <b>Probably damaging (red)</b>                          | <b>3,854</b>  |  |
| <b>Possibly damaging (violet)</b>                       | <b>1,700</b>  |  |
| <b>Probably damaging and possibly damaging combined</b> | <b>5,554</b>  |  |
| <b>Benign</b>                                           | <b>4,871</b>  |  |
| <b>All (MAF)</b>                                        | <b>10,425</b> |  |

Name of the ACE mutations (column 3), that were already confirmed as LoF, were marked with **red**.

<sup>a</sup> Japanese; <sup>b</sup> Mutations, eliminating transmembrane anchor, i.e. increasing (>10-fold) blood ACE, and thus, decreasing tissue ACE; <sup>c</sup> mostly African; <sup>d</sup> much more frequent in Netherlands [18];

Frequency of mutations (MAF, column 6): >10-**bold**, >100-**red**, >1000-**bold red**.

Blood ACE levels (column 7) is expressed as % of mean in population.

**Polyphen2:** PolyPhen 2 (dbNSFP version 3.3a) annotation based on HumanVar database. This annotation should be used when evaluating rare alleles at loci potentially involved in complex phenotypes, dense mapping of regions identified by genome-wide association studies, and analysis of natural selection from sequence data. The annotation consists of score and categorical prediction. There are three possible predictions: **D** (**Probably damaging, score**≥0.909), **P** (**possibly damaging,**
